# Supplementary material for: Sugar furanoid trans-vicinal diacid as a γ-turn inducer: synthesis and conformational study
Source: Royal Society of Chemistry journal article supplement (doi:10.1039/c3ob41462k), 2013-01-01

## Supporting Information

### Sugar furanoid trans-vicinal diacid as $\gamma$ -turn inducer: Synthesis and Conformational study

Madhuri Vangala,<sup>a</sup> Snehal A. Dhokale,<sup>b</sup> Rupesh L. Gawade,<sup>c</sup> Rajamohanan R. Pattuparambil,<sup>b</sup> Vedavati G Puranik<sup>c</sup> and Dilip D. Dhavale<sup>a\*</sup>

<sup>a</sup> Department of Chemistry, Garware Research Centre, University of Pune, Pune, 411 007, India.

E-mail: [ddd@chem.unipune.ac.in](mailto:ddd@chem.unipune.ac.in)

<sup>b</sup> Central NMR Facility, National Chemical Laboratory, Dr. Homi Bhabha Road, Pune 411 008, India.

<sup>c</sup> Centre for Materials Characterization, National Chemical Laboratory, Dr. Homi Bhabha Road, Pune 411 008, India.

| Contents                                                             | Page No  |
|----------------------------------------------------------------------|----------|
| Experimental Section                                                 | S2, S3   |
| <sup>1</sup> H, <sup>13</sup> C NMR Spectra of Compounds 2, 3, 4, 5  | S4-S11   |
| IR of Compound 5                                                     | S12      |
| HRMS Spectra of Compounds 2, 3, 4, 5                                 | S13-S16  |
| IR of Resin bound glycopeptides 7                                    | S17      |
| HPLC Profiles of Crude and Pure 8                                    | S18-S19  |
| HRMS of 8                                                            | S20      |
| Glycopeptide 8 numbering, <sup>1</sup> H, <sup>13</sup> C HSQC table | S21, S22 |
| <sup>1</sup> H, <sup>13</sup> C, DEPT of 8                           | S23, S24 |
| COSY of 8                                                            | S25-S27  |
| TOCSY of 8                                                           | S28-S30  |
| NOESY of 8                                                           | S31-S33  |
| HMBC of 8                                                            | S33-S35  |
| HSQC, <sup>15</sup> N HSQC of 8                                      | S36-S38  |
| DMSO titration studies                                               | S39      |
| Distance constraints NOE                                             | S40      |

## Experimental Section

**General Methods.** Reactions were carried out with distilled and dried solvents using oven-dried glassware. All reagents, protected amino acids, 2-Chloro Trityl chloride resin, were purchased from commercial sources.  $^1\text{H}$  NMR and  $^{13}\text{C}$  NMR were recorded in  $\text{CDCl}_3$  and  $\text{DMSO}-d_6$  using TMS as internal standard. Melting points are uncorrected. Optical rotations were measured on a polarimeter. Kaiser test was used for detection of primary amines on the solid phase. HPLC analyses were carried out using analytical (RP Luna  $5\mu\text{C}18(2)$   $100\text{\AA}$  Column  $250 \times 4.6$  mm) with gradient elution: Mass samples were analyzed by High-resolution mass spectrometry using ESI TOF and MALDI TOF/TOF. IR spectra were obtained using FT-IR spectrophotometer using KBr pellets and NaCl plates and recorded in  $\text{cm}^{-1}$ . Circular dichroism (CD) was performed on spectrophotometer using a cell of 2mm path length. Spectra were recorded as an accumulation of 3 scans using a scan speed of 100nm/min, with resolution of 1.0 nm, band-width 1.0 nm and a response of 1 sec. Spectra were smoothed(5) and plotted using OriginPro 6.1.

### 1,2:5,6-di-*O*-isopropylidene-3-*C*-trichloromethyl- $\alpha$ -*D*-allofuranose (**2**)

To a solution of ketone (5.0 g, 19.3 mmol) in dry THF (50 mL) and  $\text{CHCl}_3$  (12.0 mL, 144.2 mmol) under nitrogen atmosphere, cooled at  $-78\text{ }^\circ\text{C}$  in julabo was added 1M LHMDS soln (38.7 mL, 38.7 mmol) dropwise over a period of 20 min. Reaction mixture was stirred at this temperature for 3h and then brought to  $0\text{ }^\circ\text{C}$ . Reaction mixture was quenched with saturated solution of  $\text{NaHCO}_3$  at  $0\text{ }^\circ\text{C}$  to neutralize. The resulting mixture was concentrated at rotary evaporation and extracted with  $\text{CHCl}_3$  (75 mL X 3). The combined organic layer was washed with water, brine and dried over  $\text{Na}_2\text{SO}_4$  and concentrated. Purification of the residue by column chromatography over silica with 9:1 hexane/EtOAc as eluent afforded trichloromethyl alcohol **2** as a white crystalline solid: (3.5g, 48%)  $R_f = 0.5$  (hexane/EtOAc, 85:15);  $[\alpha]_D^{26} = +31.8$  ( $c$  1.0,  $\text{CHCl}_3$ ) [lit.<sup>ref-15</sup>: +30.1( $c$  1.0,  $\text{CHCl}_3$ )]; mp-  $136\text{-}138\text{ }^\circ\text{C}$ ; IR (KBr,  $\nu$ ,  $\text{cm}^{-1}$ ) 3435 (OH), 2991, 1452, 1375, 1267, 1159, 850, 642;  $^1\text{H}$ NMR (300 MHz,  $\text{CDCl}_3$ )  $\delta$  (ppm) 1.36 (s, 3H,  $\text{CH}_3$ ), 1.43 (s, 3H,  $\text{CH}_3$ ), 1.45 (s, 3H,  $\text{CH}_3$ ), 1.63 (s, 3H,  $\text{CH}_3$ ), 3.86 (s, exchangeable, 1H, OH), 3.91 (dd,  $J = 8.4, 7.1$  Hz, 6CHa), 4.20-4.10 (m, 2H, 4CH, 6CHa'), 4.73-4.67 (m, 1H, 5CH), 4.80 (d,  $J = 4.4$  Hz, 1H, 2CH), 5.91 (d,  $J = 4.4$  Hz, 1H, 1CH);  $^{13}\text{C}$  NMR (75 MHz,  $\text{CDCl}_3$ )  $\delta$  (ppm) 25.5 ( $\text{CH}_3$ ), 26.3 ( $\text{CH}_3$ ), 26.6 ( $\text{CH}_3$ ), 26.9 ( $\text{CH}_3$ ), 67.8 (C6), 71.9 (C5), 82.0 (C2), 85.0 (C4), 87.5 (C3), 100.8 ( $\text{CCl}_3$ ), 103.9 (C1), 109.8 ( $\underline{\text{C}}(\text{CH}_3)_2$ ), 113.3 ( $\underline{\text{C}}(\text{CH}_3)_2$ ). HRMS (TOF ES<sup>+</sup>,  $\text{CH}_3\text{CN}$ ) calcd for  $\text{C}_{13}\text{H}_{19}\text{Cl}_3\text{O}_6$   $[\text{M}+\text{Na}]^+ = 399.0144$ , found 399.0145.

### 3-Azido-3-deoxy-1,2:5,6-di-*O*-isopropylidene-3-*C*-benzylcarbamoyl- $\alpha$ -*D*-glucofuranose(**3**)

To a solution of trichloromethyl alcohol **2** (1.40 g, 3.69 mmol) in dioxane (20 mL), cooled to  $10\text{ }^\circ\text{C}$ , was added NaOH (591 mg, 14.79 mmol) dissolved in 40 mL of  $\text{H}_2\text{O}$  followed, by immediate addition of  $\text{NaN}_3$  (480 mg, 7.39 mmol) and TBAI (136 mg, 0.36 mmol). Reaction mixture was warmed to rt and stirred for 1h. Dioxane removed on rotary evaporatory and reaction mixture acidified to pH 3 using solid  $\text{NH}_4\text{Cl}$ . The reaction mixture was extracted with EtOAc (75 mL X 3), combined organic layers dried over  $\text{Na}_2\text{SO}_4$  and concentrated to obtain azido acid. To crude azido acid compound (1.1 g, 3.34 mmol) in dry DCM (12 mL) was added EDCI (832 mg, 4.34 mmol), HOBT (586 mg, 4.34 mmol), mol.seives under nitrogen atmosphere. Reaction mixture was stirred at rt for 15 min.  $\text{BnNH}_2$  (1.1 mL, 10.02 mmol) was added dropwise and stirred at rt for overnight. Water was added to the reaction mixture and extracted into DCM (50 mL X 2). Combined organic layer washed with water, brine, dried over  $\text{Na}_2\text{SO}_4$  and concentrated. The residue was purified by column chromatography over silica with 8.5:1.5 hexane/EtOAc as eluent to give compound **3** as a white solid:  $R_f = 0.5$  (hexane/EtOAc, 80:20); (1.08 g, 78%);  $[\alpha]_D^{26} = +58.32$  ( $c$  1.0,  $\text{CHCl}_3$ ); mp-  $146\text{-}148\text{ }^\circ\text{C}$ ; IR ( $\text{CHCl}_3$ ,  $\nu$ ,  $\text{cm}^{-1}$ ) 3290, 2923, 2127, 1669, 1547, 1373, 850;  $^1\text{H}$ NMR (300 MHz,  $\text{CDCl}_3$ )  $\delta$  (ppm) 1.22 (s, 3H,  $\text{CH}_3$ ), 1.33 (s, 3H,  $\text{CH}_3$ ), 1.37 (s, 3H,  $\text{CH}_3$ ), 1.55 (s, 3H,  $\text{CH}_3$ ), 3.95 (dd,  $J = 8.6, 5.4$  Hz, 1H, 6CHa), 4.25-4.10 (m, 2H, 5CH, 6CHa'), 4.31-4.26 (m, 1H, 4CH), 4.49 (d,  $J = 5.0$  Hz, 2H,  $\text{CH}_2\text{Ph}$ ), 4.89 (d,  $J = 3.2$  Hz, 1H, 2CH), 5.82 (d,  $J = 3.2$  Hz, 1H, 1CH), 7.40-7.20 (m, 5H, Ph), 7.69 (br s, 1H, NH);  $^{13}\text{C}$  NMR (75 MHz,  $\text{CDCl}_3$ )  $\delta$  (ppm) 24.8 ( $\text{CH}_3$ ), 25.6 ( $\text{CH}_3$ ), 26.4 ( $\text{CH}_3$ ), 26.8 ( $\text{CH}_3$ ), 43.9 ( $\text{CH}_2\text{Ph}$ ), 67.9 (C6), 71.7 (C5), 75.3 (C3), 79.9 (C4), 85.1 (C2), 103.2 (C1), 110.4 ( $\underline{\text{C}}(\text{CH}_3)_2$ ), 113.3 ( $\underline{\text{C}}(\text{CH}_3)_2$ ), 127.6 (Ph), 128.0 (Ph), 128.6 (Ph), 137.1 (Ph), 164.6 (CONH). HRMS (TOF ES<sup>+</sup>,  $\text{CH}_3\text{CN}$ ) calcd for  $\text{C}_{20}\text{H}_{26}\text{N}_4\text{O}_6$   $[\text{M}+\text{Na}]^+ = 441.1749$ , found 441.1750.

### 3-Azido-3-deoxy 1,2-*O*-isopropylidene 3-*C*-benzyl carbamoyl $\alpha$ -*D*-glucofuranose (**4**)

A soln of **3** (750 mg) in AcOH (8 mL, 85%) was heated to  $50\text{ }^\circ\text{C}$  for 3h. Reaction mixture neutralized with solid  $\text{NaHCO}_3$  and extracted into EtOAc (25 mL X 3). Combined organic layer washed with sat.  $\text{NaHCO}_3$  (5 mL X 3), brine, dried over  $\text{Na}_2\text{SO}_4$  and concentrated. Residue after purification by chromatography over silica 4:6 hexane/EtOAc as eluent gave product **4** as a sticky compound:  $R_f = 0.3$  (hexane/EtOAc, 40:60) (603.0 mg, 90%);  $[\alpha]_D^{24} = +43.48$  ( $c$  0.51,  $\text{CHCl}_3$ ); IR (neat,  $\nu$ ,  $\text{cm}^{-1}$ ) 3345 (br), 2115, 1660, 1376, 1030, 874;  $^1\text{H}$ NMR (300 MHz,  $\text{CDCl}_3$ )  $\delta$  (ppm) 1.35 (s, 3H,  $\text{CH}_3$ ), 1.52 (s, 3H,  $\text{CH}_3$ ), 2.80-3.60 (br, exchangeable, 2H, OH), 3.66 (dd,  $J = 11.9, 5.1$  Hz, 1H, 6CHa), 3.80 (dd,  $J = 11.9, 3.2$  Hz, 1H, 6CHa'), 4.10- 3.90 (m, 1H, 5CH), 4.41 (d,  $J = 9.2$  Hz, 1H, 4CH), 4.46 (dd,  $J = 15, 5.5$  Hz, 1H,  $\text{CH}_2\text{Ph}$ ), 4.54 (dd,  $J = 15, 5.9$  Hz, 1H,  $\text{CH}_2\text{Ph}$ ), 4.74 (d,  $J = 3.6$  Hz, 1H, 2CH), 5.87 (d,  $J = 3.6$  Hz, 1H, 1CH), 7.40-7.20 (m, 5H, Ph), 7.65 (br s, 1H, NH);  $^{13}\text{C}$  NMR (75 MHz,  $\text{CDCl}_3$ )  $\delta$  (ppm) 26.5 ( $\text{CH}_3$ ), 26.6 ( $\text{CH}_3$ ), 43.8 ( $\text{CH}_2\text{Ph}$ ), 64.0 (C6), 69.0 (C5), 75.5 (C3), 79.6 (C4), 84.7 (C2),

103.8 (C1), 113.6 (C(CH<sub>3</sub>)<sub>2</sub>), 127.4 (Ph), 127.5 (Ph), 128.6 (Ph), 137.1 (Ph), 166.1 (CONH). HRMS (TOF ES<sup>+</sup>, CH<sub>3</sub>CN) calcd for C<sub>17</sub>H<sub>22</sub>N<sub>4</sub>O<sub>6</sub> [M+Na]<sup>+</sup> = 401.1436, found 401.1436.

### 3-Azido-3-deoxy 1,2-O-isopropylidene 3-C-benzyl carbamoyl α-D-glucofuranose 5-carboxylic acid (5)

To the diol **4** (590 mg, 1.56 mmol) in THF (10 mL) and H<sub>2</sub>O (2.5 mL) was added NaIO<sub>4</sub> (433 mg, 2.02 mmol) in two portions and reaction mixture stirred at 0 °C for 30min. Ethylene glycol (0.15 mL) was added to quench the reaction mixture and extracted with EtOAc (25 mL X 2). Combined organic layer washed with water, brine, dried over Na<sub>2</sub>SO<sub>4</sub> and concentrated to give aldehyde as white foam. To the crude aldehyde (480 mg, 1.38 mmol) and oxone (420 mg, 1.38 mmol) taken in a RB was added dry DMF (8 mL) under N<sub>2</sub> atmosphere. Reaction mixture stirred at RT for 3h and then quenched by adding sat. NH<sub>4</sub>Cl. DMF removed on rota under reduced pressure and residue extracted with EtOAc (75 mL X 3) and dried over Na<sub>2</sub>SO<sub>4</sub>. Crude compound was purified by chromatography over silica using 9.5:0.5 EtOAc/MeOH as eluent to give product **5** as a white solid: *R*<sub>f</sub> = 0.1 (EtOAc/MeOH, 90:10); (426 mg, 85%); [α]<sub>D</sub><sup>24</sup> = +106.81 (*c* 0.57, MeOH); mp- 153-155 °C; IR (CHCl<sub>3</sub>, ν, cm<sup>-1</sup>) 3392 (br), 2121, 1739, 1662, 1383, 1247, 1041, 873; <sup>1</sup>H NMR (300 MHz, DMSO-*d*<sub>6</sub>) δ (ppm) 1.26 (s, 3H, CH<sub>3</sub>), 1.40 (s, 3H, CH<sub>3</sub>), 4.50-4.30 (m, 2H, CH<sub>2</sub> Ph), 4.58 (s, 1H, 4CH), 4.82 (br s, 1H, 2CH), 5.86 (br s, 1H, 1CH), 7.40-7.15 (m, 5H, Ph), 11.4-11.2 (br s, 1H, NH). <sup>13</sup>C NMR (75 MHz, DMSO-*d*<sub>6</sub>) δ (ppm) 26.3 (CH<sub>3</sub>), 26.5 (CH<sub>3</sub>), 42.1 (CH<sub>2</sub>NH), 75.4 (C4), 78.0 (C3), 84.2 (C2), 102.0 (C1), 111.6 (C(CH<sub>3</sub>)<sub>2</sub>), 126.7 (Ph), 126.8 (Ph), 128.2 (Ph), 138.7 (Ph), 165.0 (CONH), 169.0 (COOH). HRMS (TOF ES<sup>+</sup>, MeOH) calcd for C<sub>16</sub>H<sub>18</sub>N<sub>4</sub>O<sub>6</sub> [M+Na]<sup>+</sup> = 385.1123, found 385.1125.

### Synthesis and Analysis of peptides

2-chlorotrityl chloride resin (0.8 mmol/g) was used. FmocAA/SAA-**5** (3 eq each), HBTU (3 eq), HOBT (3 eq) was dissolved in 200 μL of DMF, followed by addition of DIPEA (7 eq). The solution was agitated at rt for 2 min and transferred to the resin. The coupling reaction was performed for 4 h, after which the resin was drained and washed with several times with DMF/DCM/DMF. The *N*-terminal Fmoc group was removed by addition of 20% piperidine in DMF (2 x 1.5 mL) and monitored by Kaiser's test. Finally, after the last coupling with SAA-**5**, resin is washed with DMF (4 x 1 mL), DCM (4 x 1 mL), MeOH (1 x 1 mL), DCM (4 x 1 mL) and dried under vacuum.

### Cleavage of **8** from resin

Resin was cleaved under very mild conditions using the following protocol: To 50 mg resin in a vial was added 400 μL of cooled 0.2% TFA in DCM for 15 min. The reaction mixture was filtered through a sintered funnel, the residue washed with DCM and the combined filtrate and washings were evaporated under vacuum to get residue which was redissolved in 200 μL of HPLC grade CH<sub>3</sub>CN for rp-HPLC analysis and purification to give colourless amorphous solid. (*t*<sub>R</sub>=25.7 min, [A = 0.05% TFA in H<sub>2</sub>O (100%), B = 0.05% TFA in CH<sub>3</sub>CN (100%) with flow rate 1.0 mL min<sup>-1</sup> (Linear gradient from A to 100% B in 30 min) UV detection: 220, 260 nm]. IR (CHCl<sub>3</sub>, ν, cm<sup>-1</sup>) 3450-3410 (br), 2922, 2115, 1637-1630 (br); <sup>1</sup>H NMR (500MHz, CD<sub>3</sub>CN) δ (ppm) 1.11 (d, *J* = 6.3 Hz, 3H), 1.16 (s, 9H), 1.20 (t, *J* = 7.6 Hz, 2H), 1.33 (s, 3H), 1.36 (br s, 2H), 1.39 (s, 9H), 1.50 (s, 3H), 1.54 (d, *J* = 7.0 Hz, 1H), 1.77 - 1.69 (m, 1H), 2.85 (dd, *J* = 14.1, 8.7 Hz, 1 H), 2.95 (q, *J* = 6.6 Hz, 2H), 3.06 (dd, *J* = 14.1, 4.9 Hz, 2H), 3.14 - 3.09 (m, 1H), 3.22 (dd, *J* = 14.8, 5.3 Hz, 1H), 4.21 (dq, *J* = 6.2, 2.8 Hz, 1H), 4.37 - 4.33 (m, 1H), 4.39 (dd, *J* = 8.3, 2.6 Hz, 1H), 4.43 (d, *J* = 5.8 Hz, 2H), 4.56 - 4.50 (m, 1H), 4.66 - 4.60 (m, 1H), 4.85 (m, 2H), 4.86 (br s, 1H), 5.33 (br s, 1H), 5.92 (d, *J* = 3.2 Hz, 1H), 6.93 (br s, 1H), 6.95 (br s, 1H), 7.03 (s, 1H), 7.06 - 7.04 (m, 1H), 7.09 (d, *J* = 2.3 Hz, 2H), 7.11 (s, 1H), 7.16 (br s, 1H), 7.19 (s, 1H), 7.20 (s, 1H), 7.22 (s, 1H), 7.23 (s, 2H), 7.29 (s, 2H), 7.31 (s, 1H), 7.33 (s, 2 H), 7.37 (s, 1H), 7.58 (d, *J* = 7.9 Hz, 1H), 8.75 (t, *J* = 5.3 Hz, 1H), 9.21 (br s, 1H); <sup>13</sup>C NMR (500MHz, CD<sub>3</sub>CN) δ (ppm) 20.2, 23.2, 26.6, 27.1, 28.4, 28.5, 30.2, 32.2, 37.9, 40.8, 43.7, 53.9, 54.9, 55.2, 58.3, 67.7, 75.4, 76.5, 78.7, 79.0, 85.3, 104.6, 110.8, 112.2, 114.6, 118.2, 119.3, 119.8, 122.4, 124.8, 127.6, 128.0, 128.4, 129.7, 129.4, 130.3, 137.3, 137.5, 139.3, 157.0, 165.3, 169.0, 170.9, 172.0, 172.7. HRMS (TOF ES<sup>+</sup>, CH<sub>3</sub>CN) calcd for C<sub>55</sub>H<sub>72</sub>N<sub>10</sub>O<sub>13</sub> [M+Na]<sup>+</sup> = 1103.5178, found 1103.5216.

### NMR and MD Simulations

All NMR studies were carried out on 500 MHz spectrometer at a probe temperature of 295 K. For NOE experiment 12 scans were done and mixing time was (D<sub>8</sub>)1S. MD simulations were carried out using Schrödinger software. Minimization was done with steepest decent, using conjugate gradient methods. For 500 iterations each, the energy-minimized structures were then subjected to MD simulations at 295K with dielectric constant 37.5 for CD<sub>3</sub>CN. Distance constraints obtained from NOESY experiment were used in MD calculations in Schrödinger software by using macromodule application.

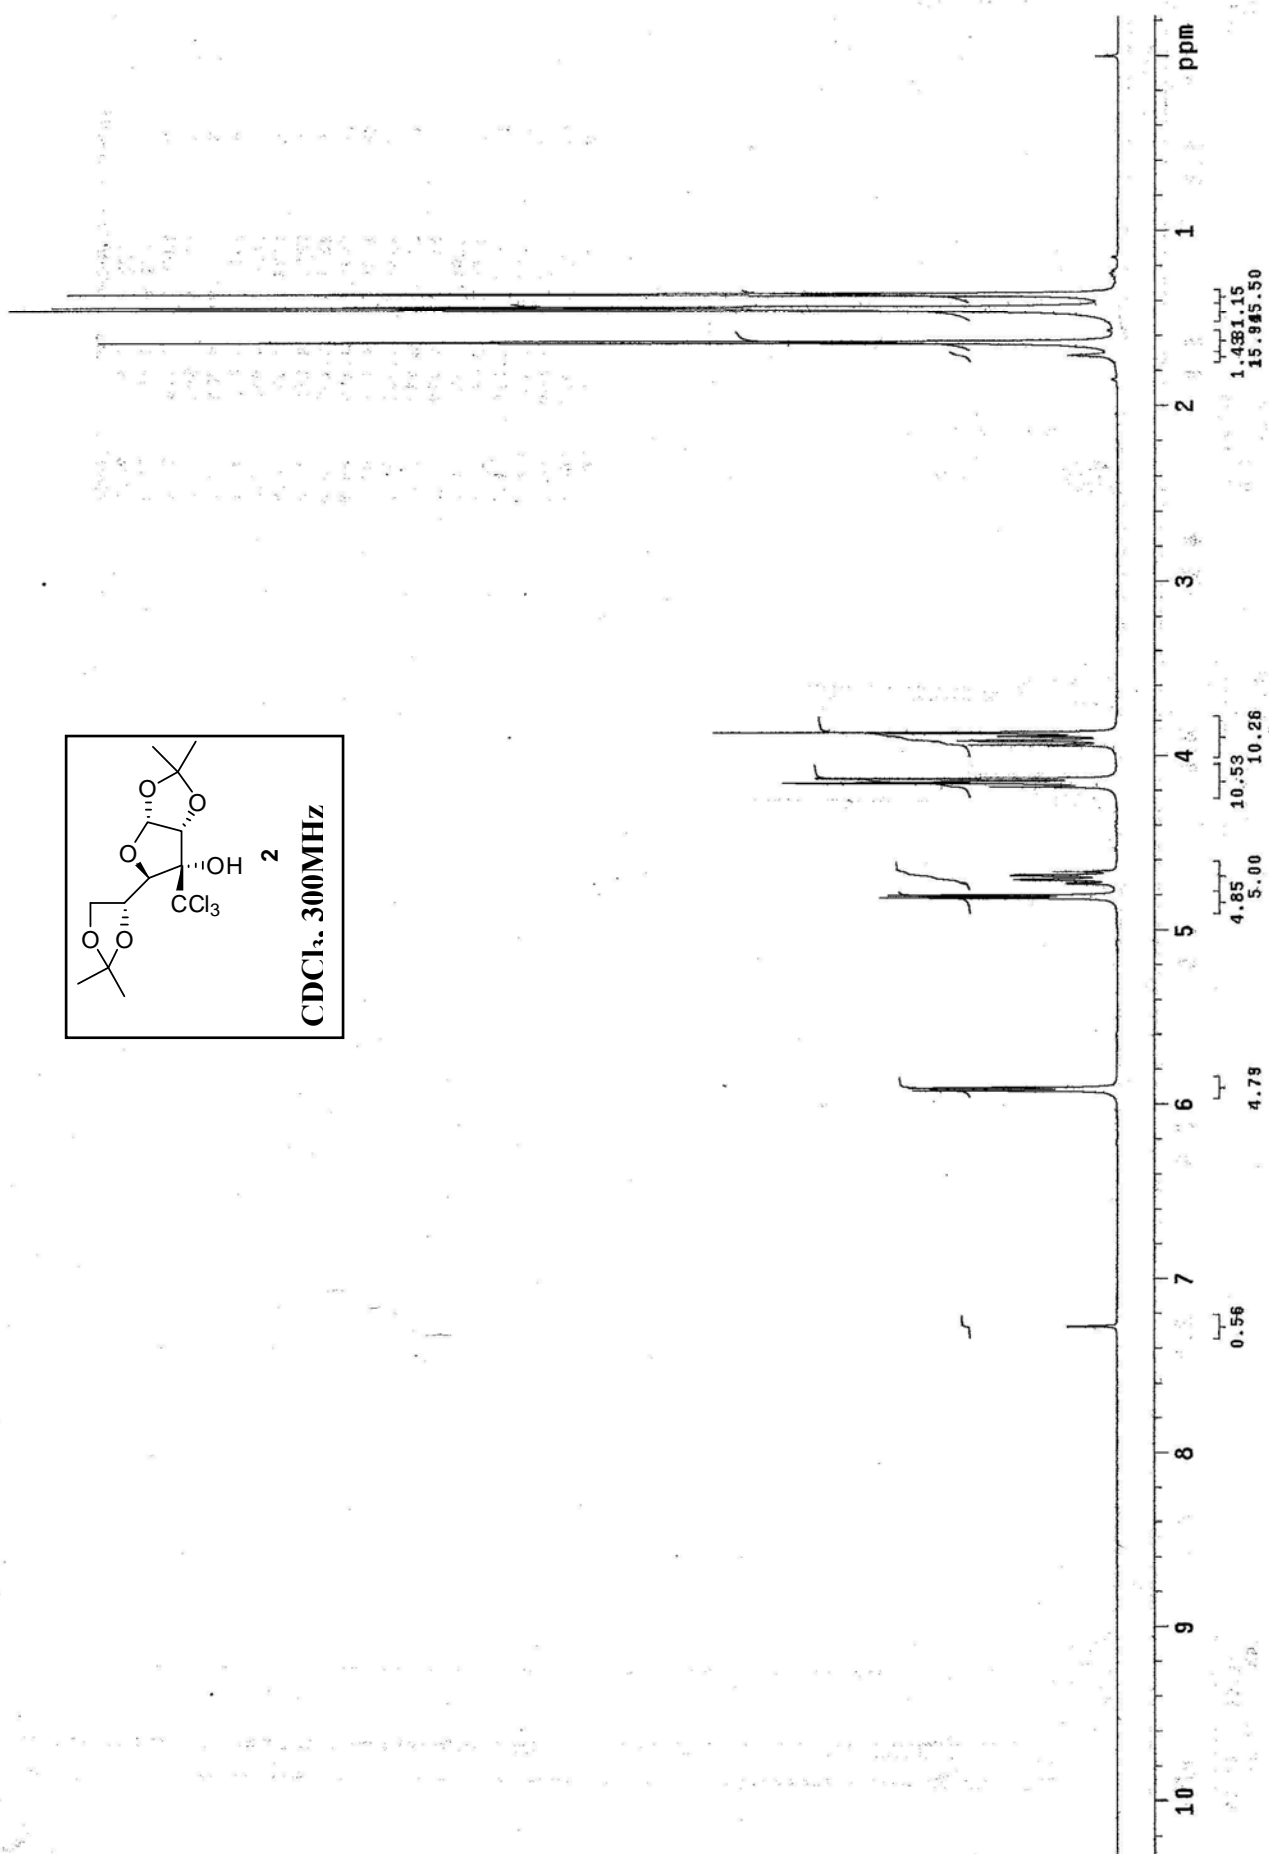

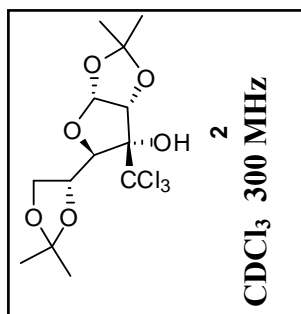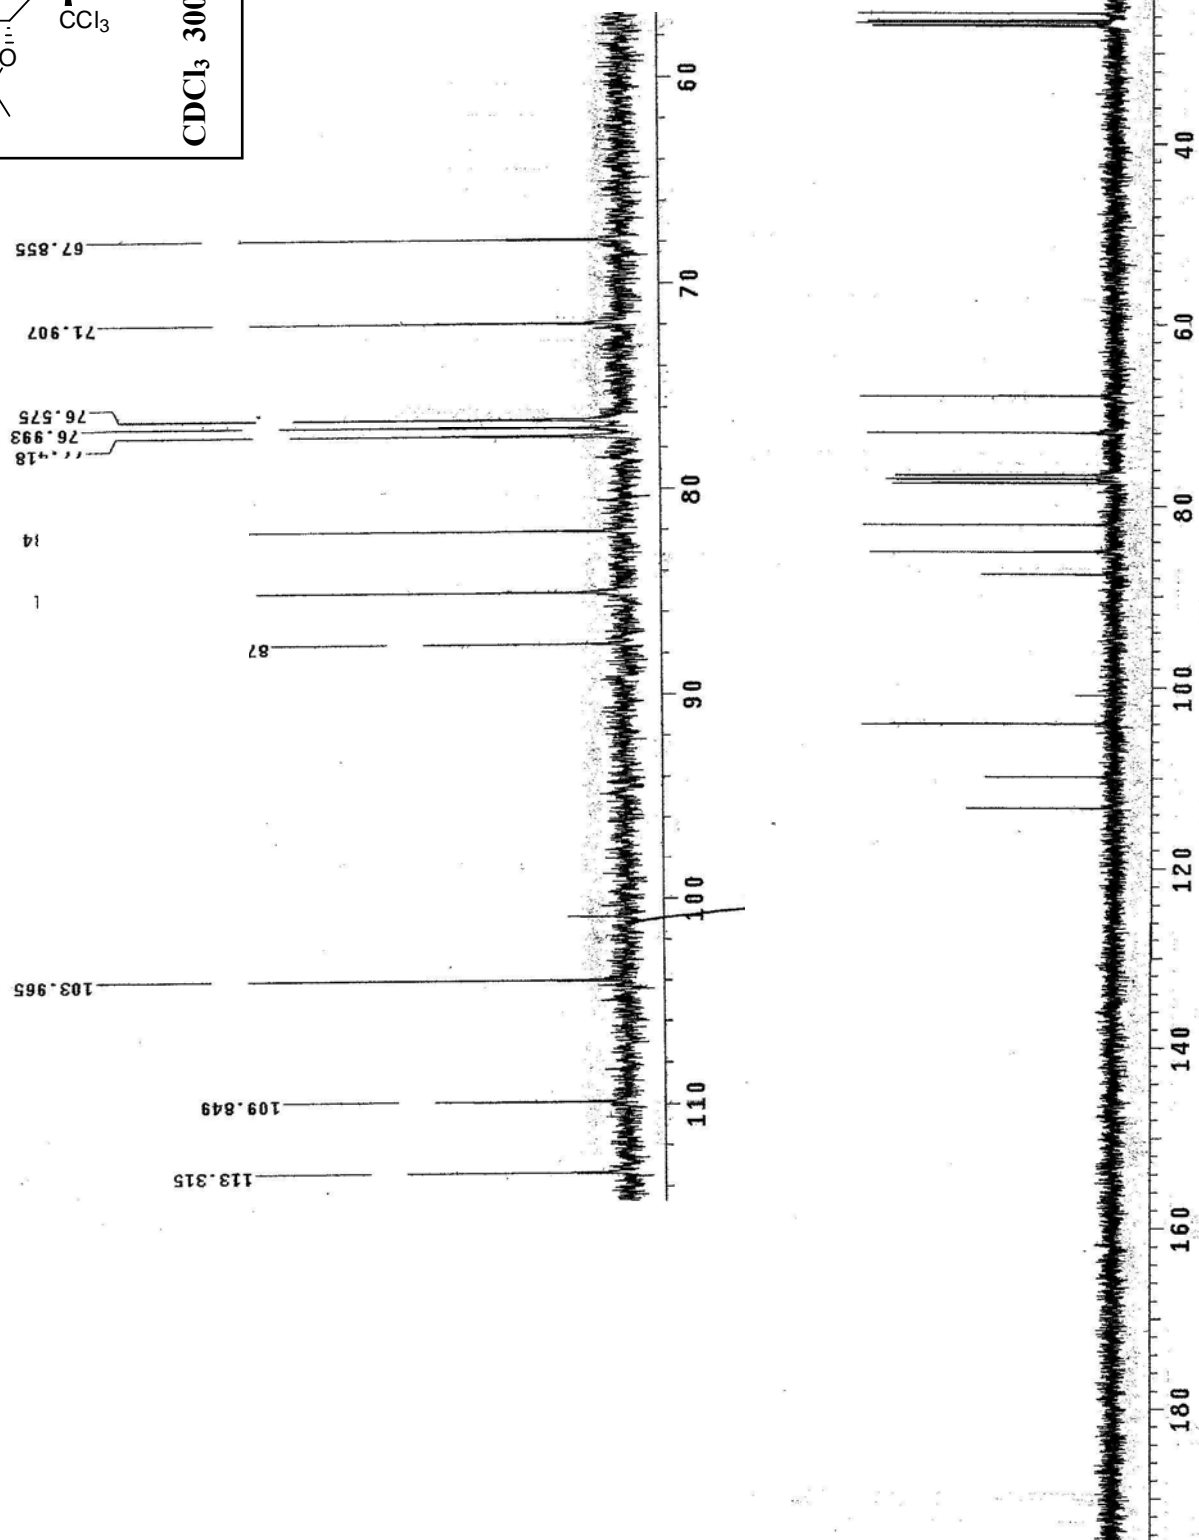

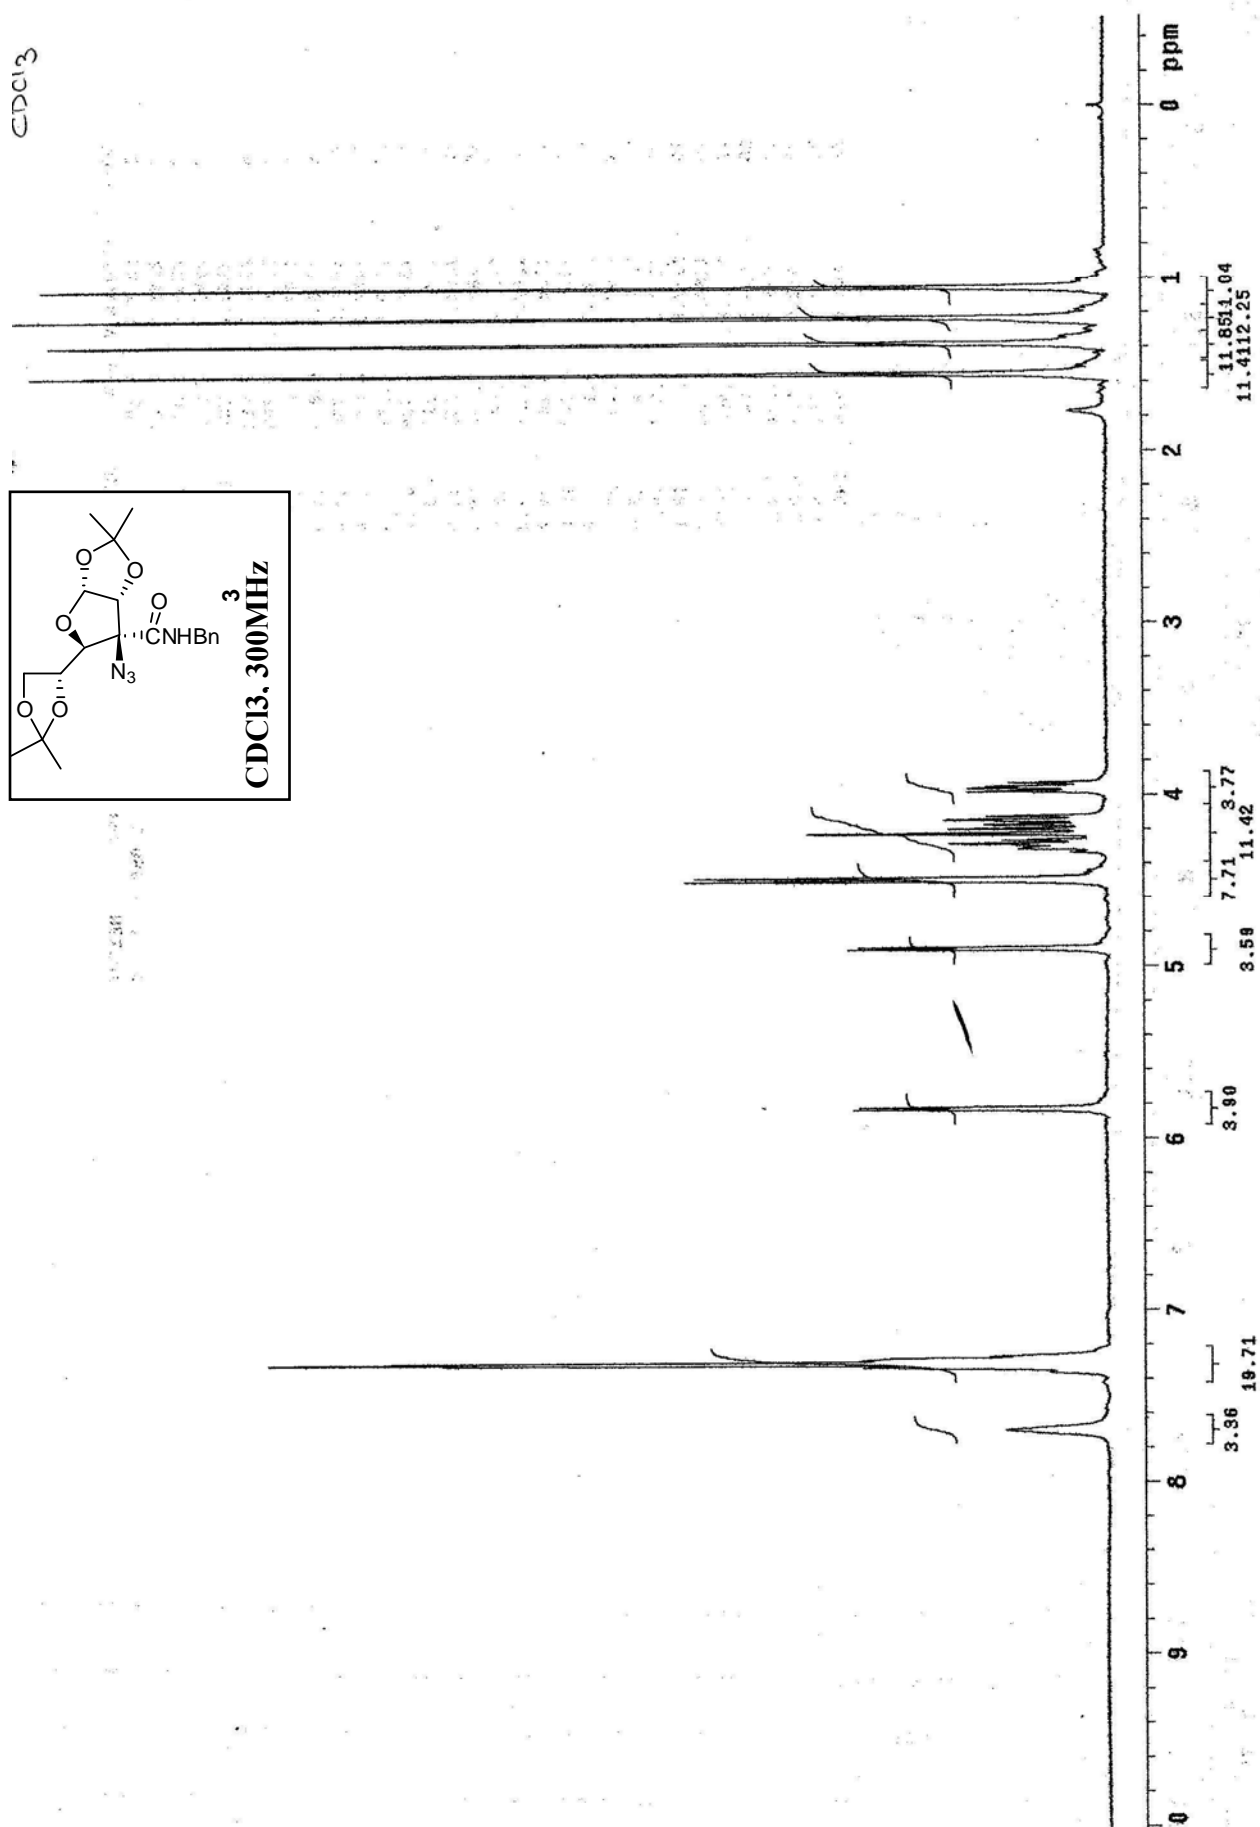

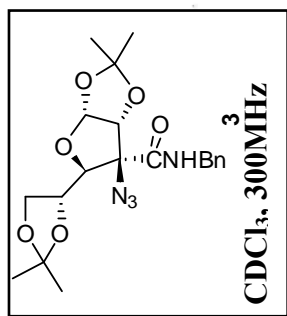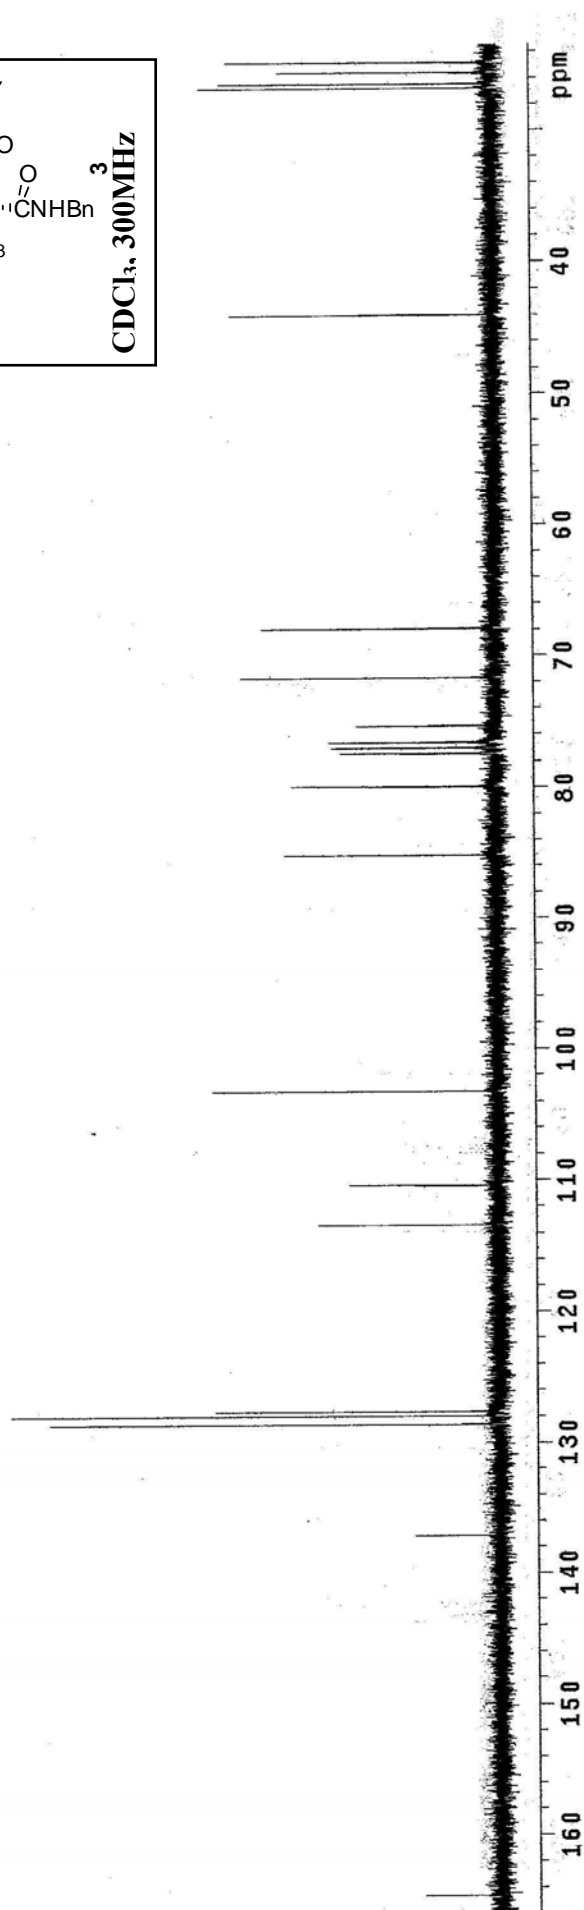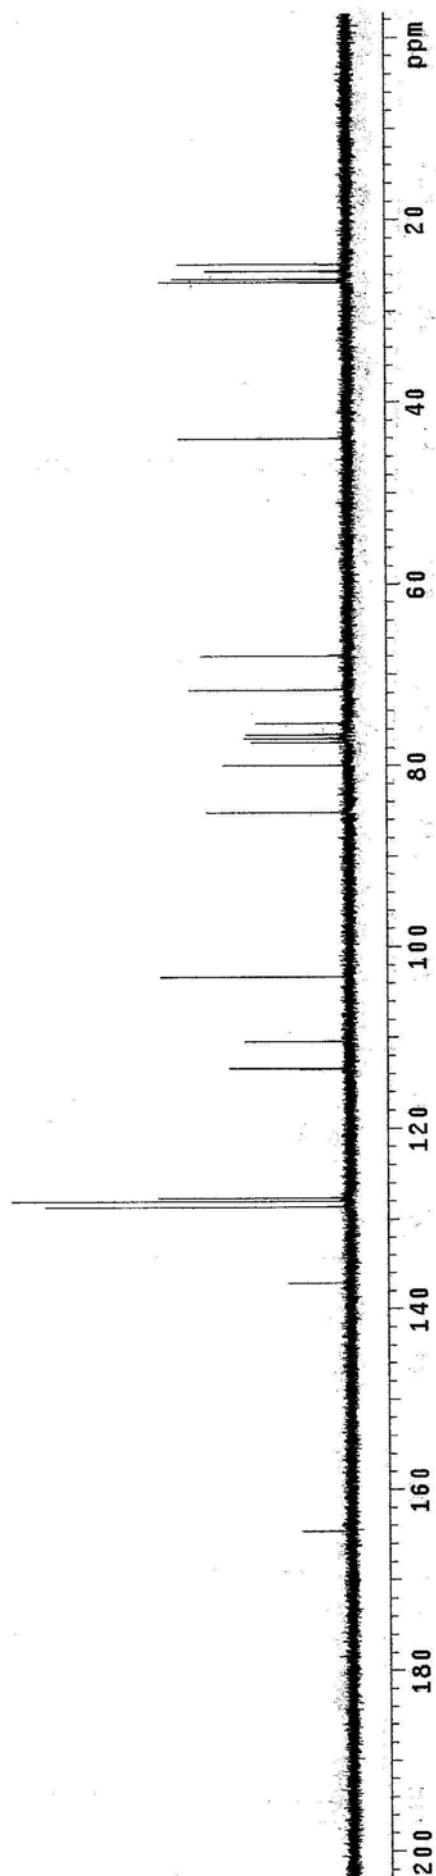



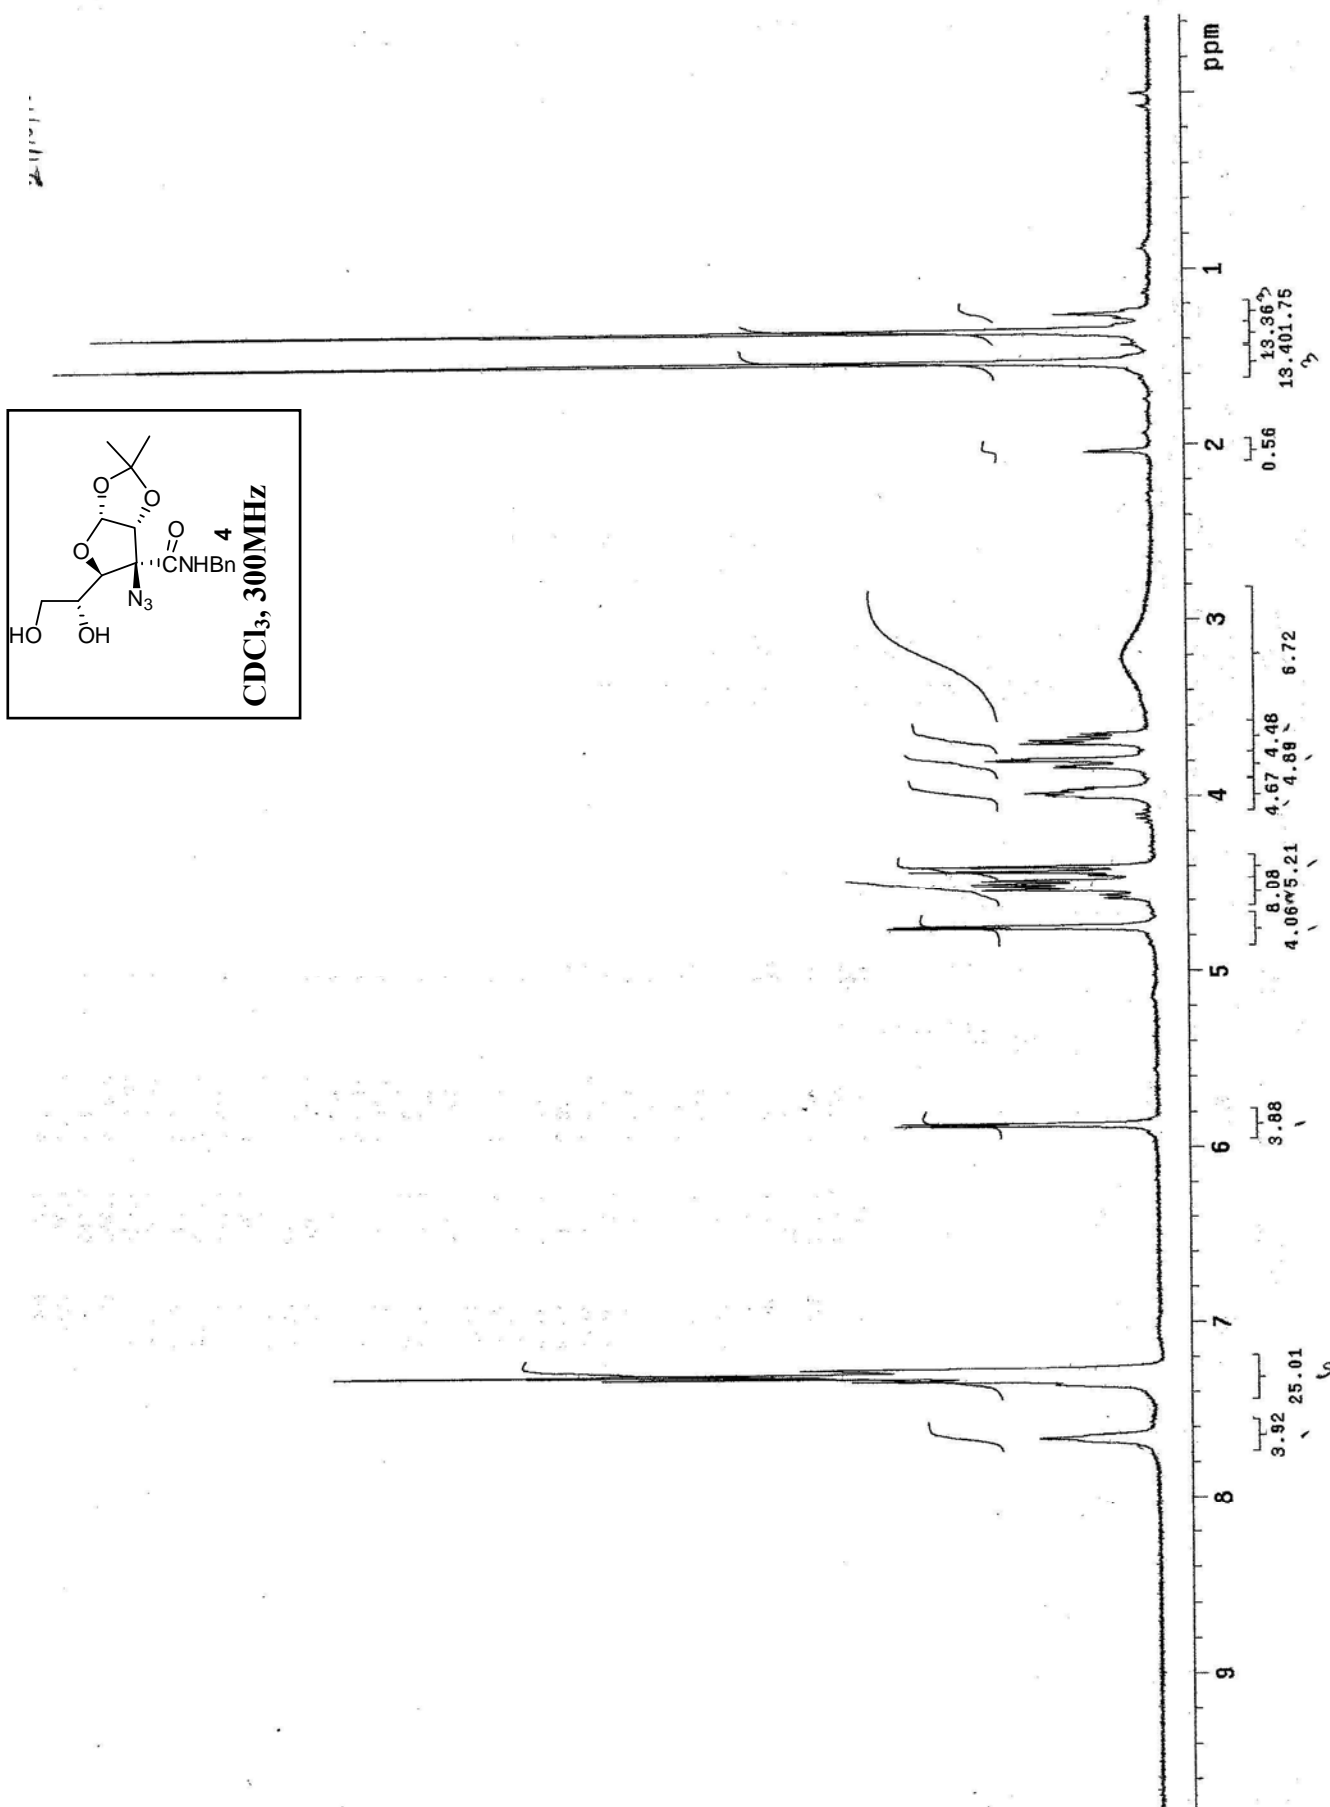



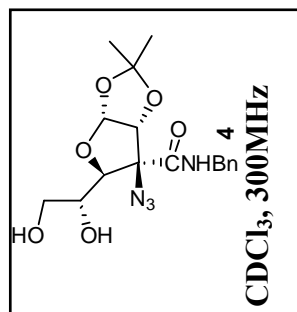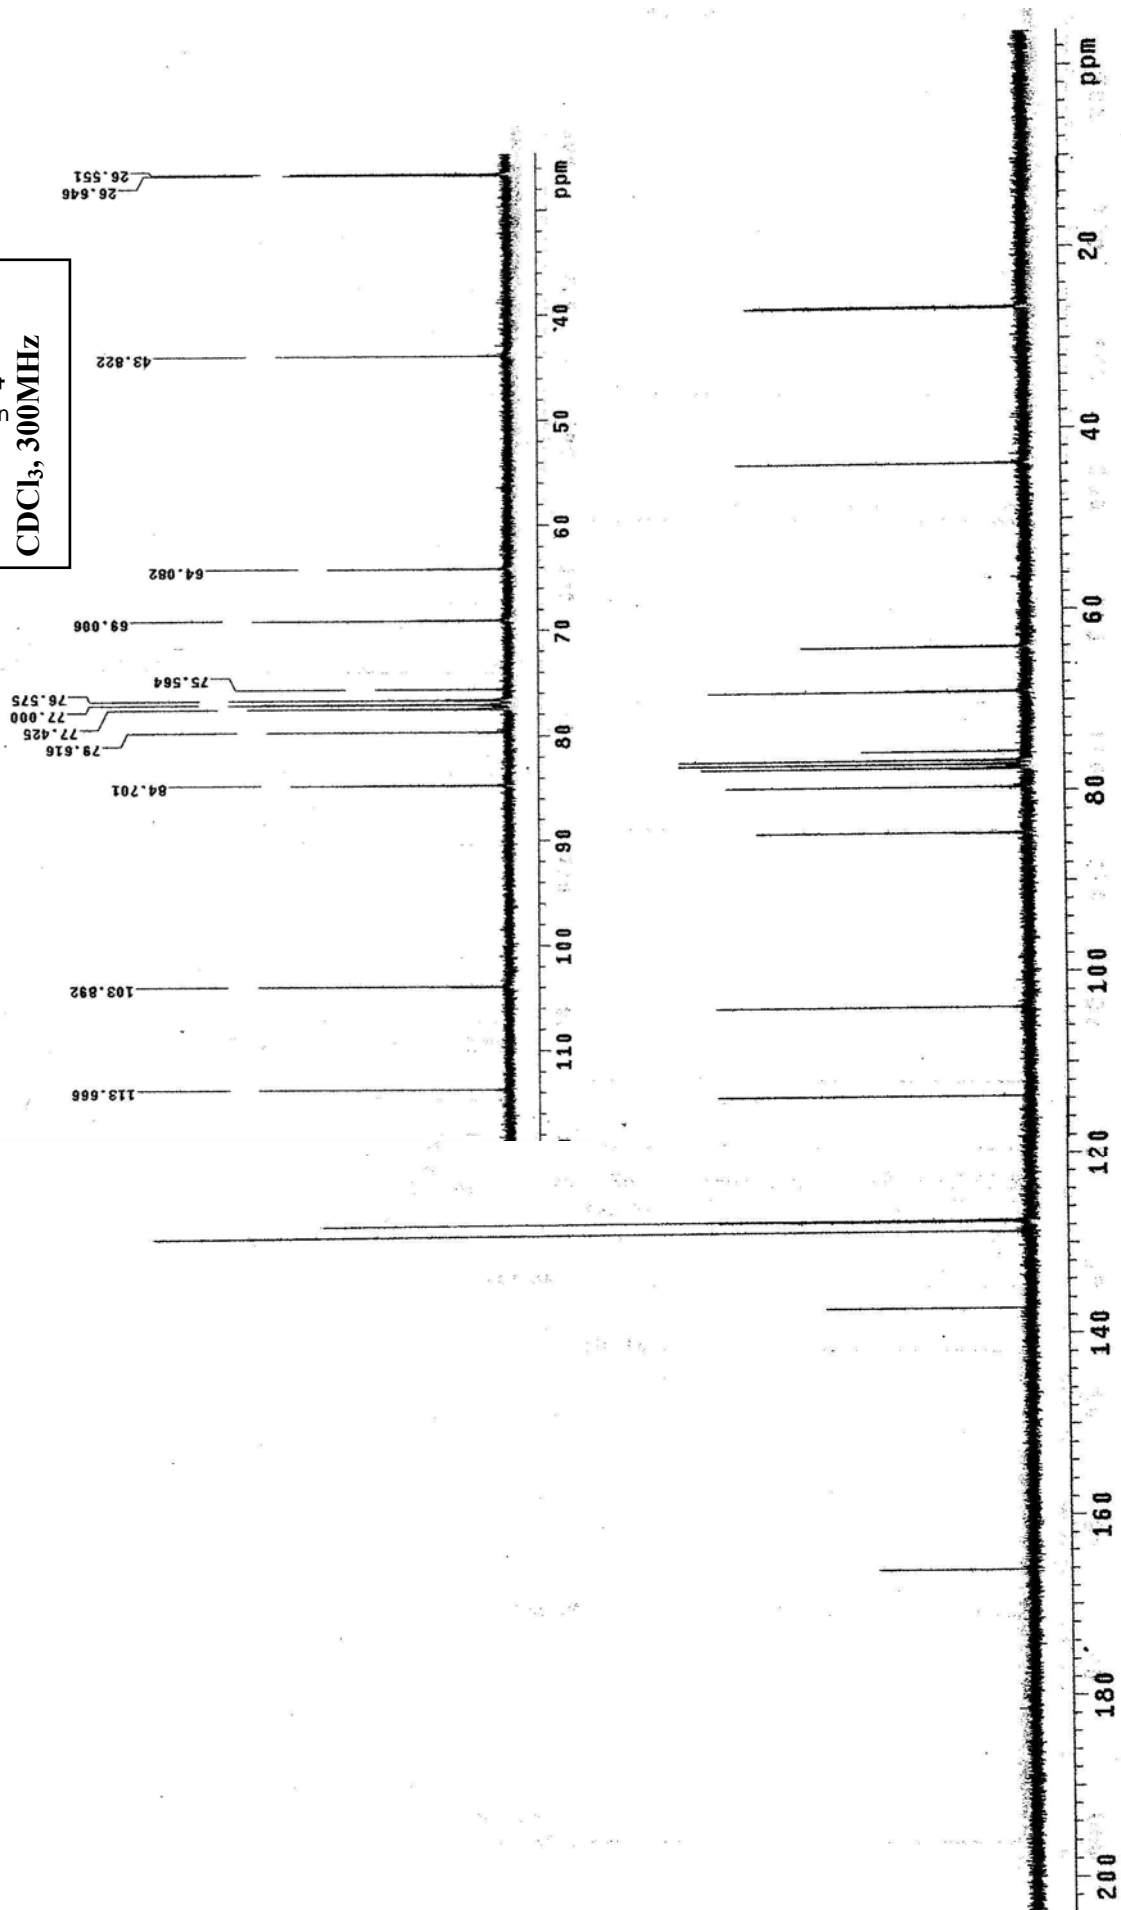

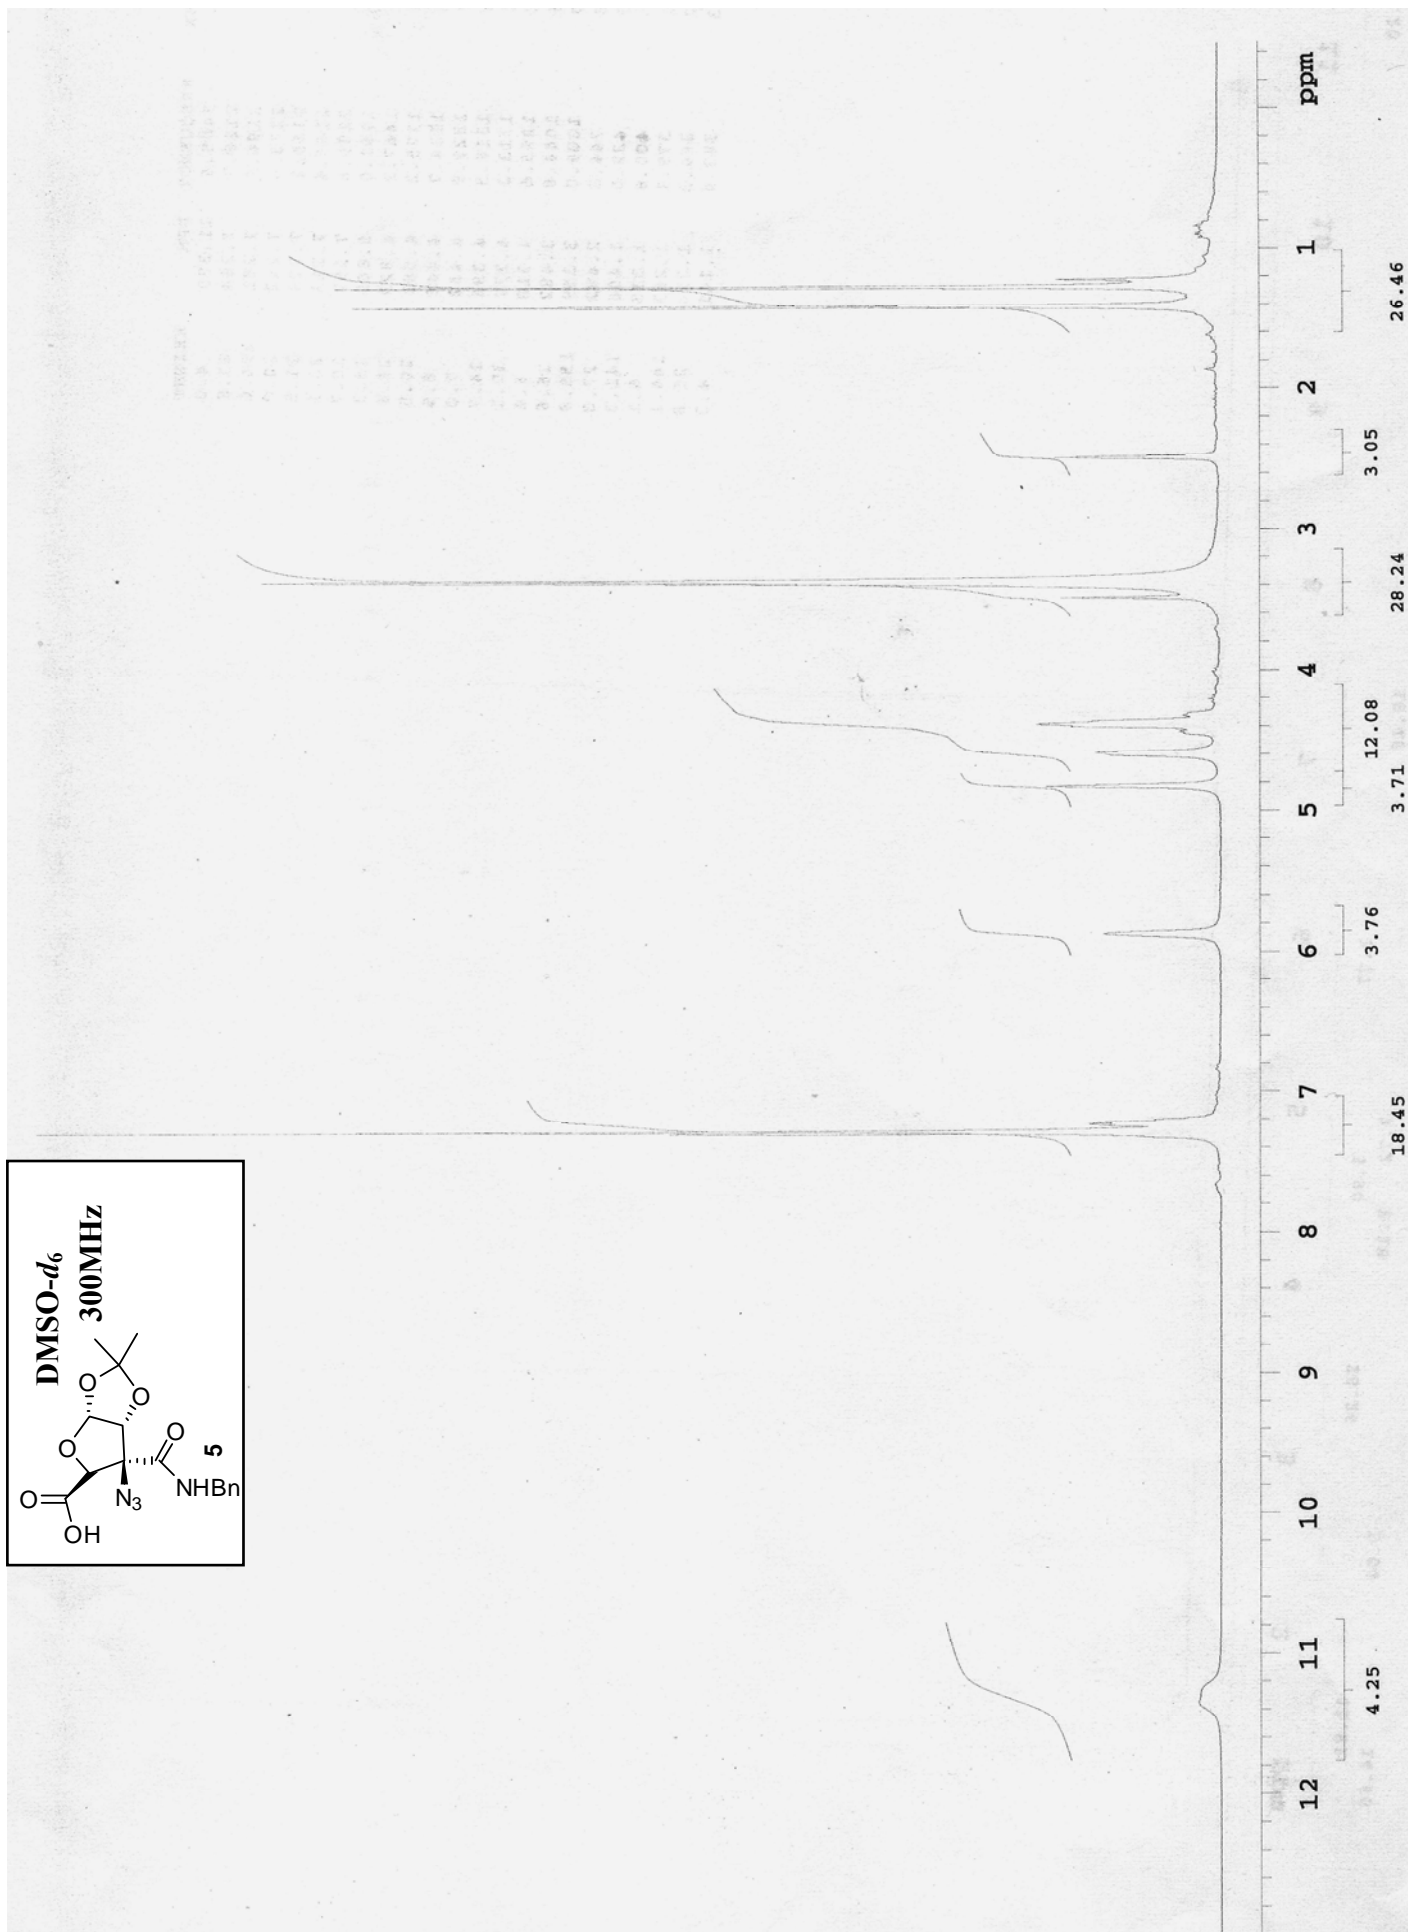

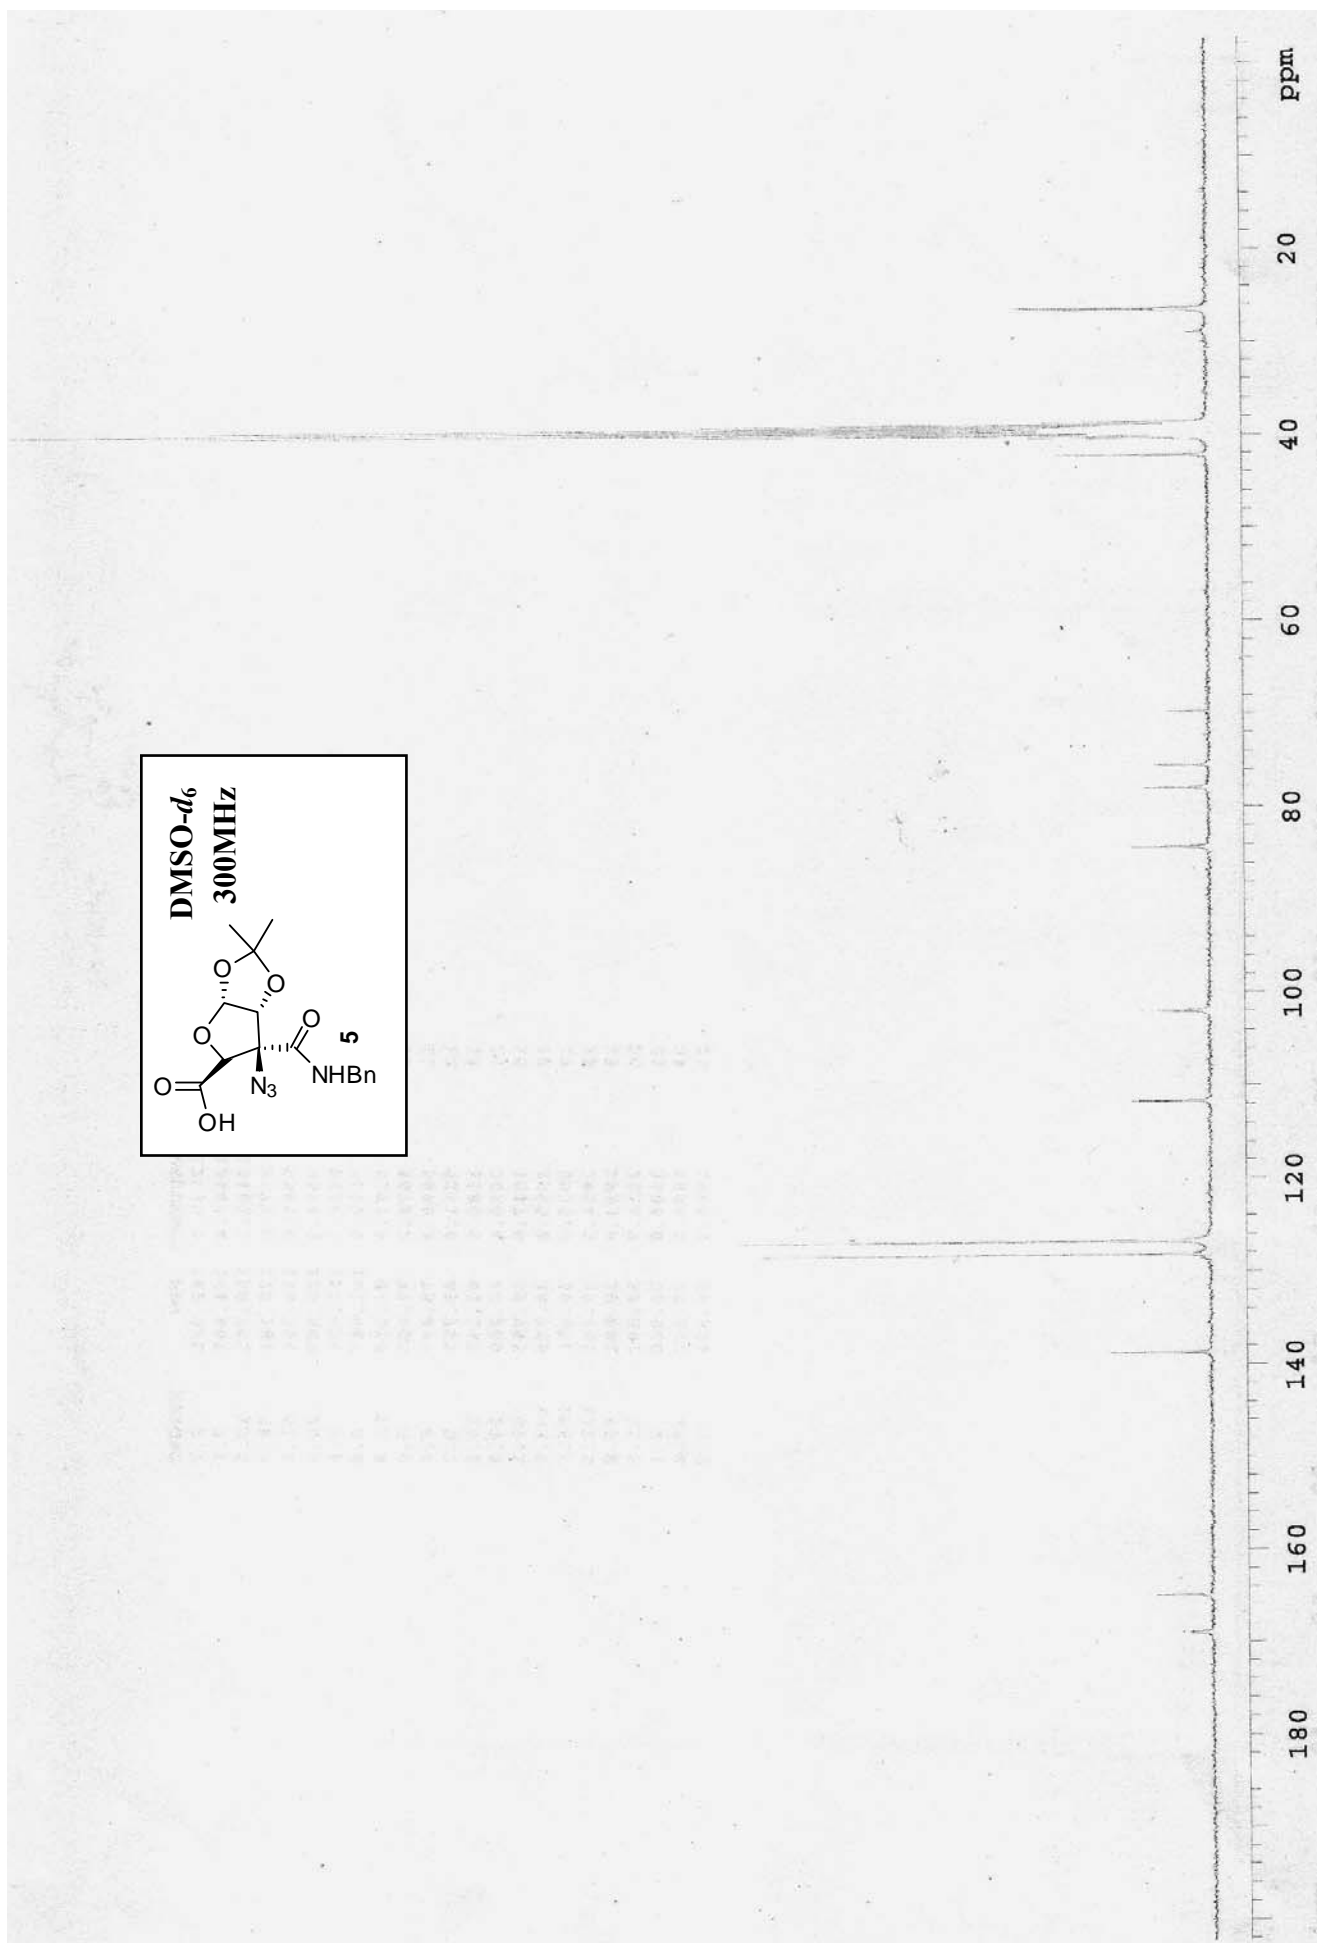

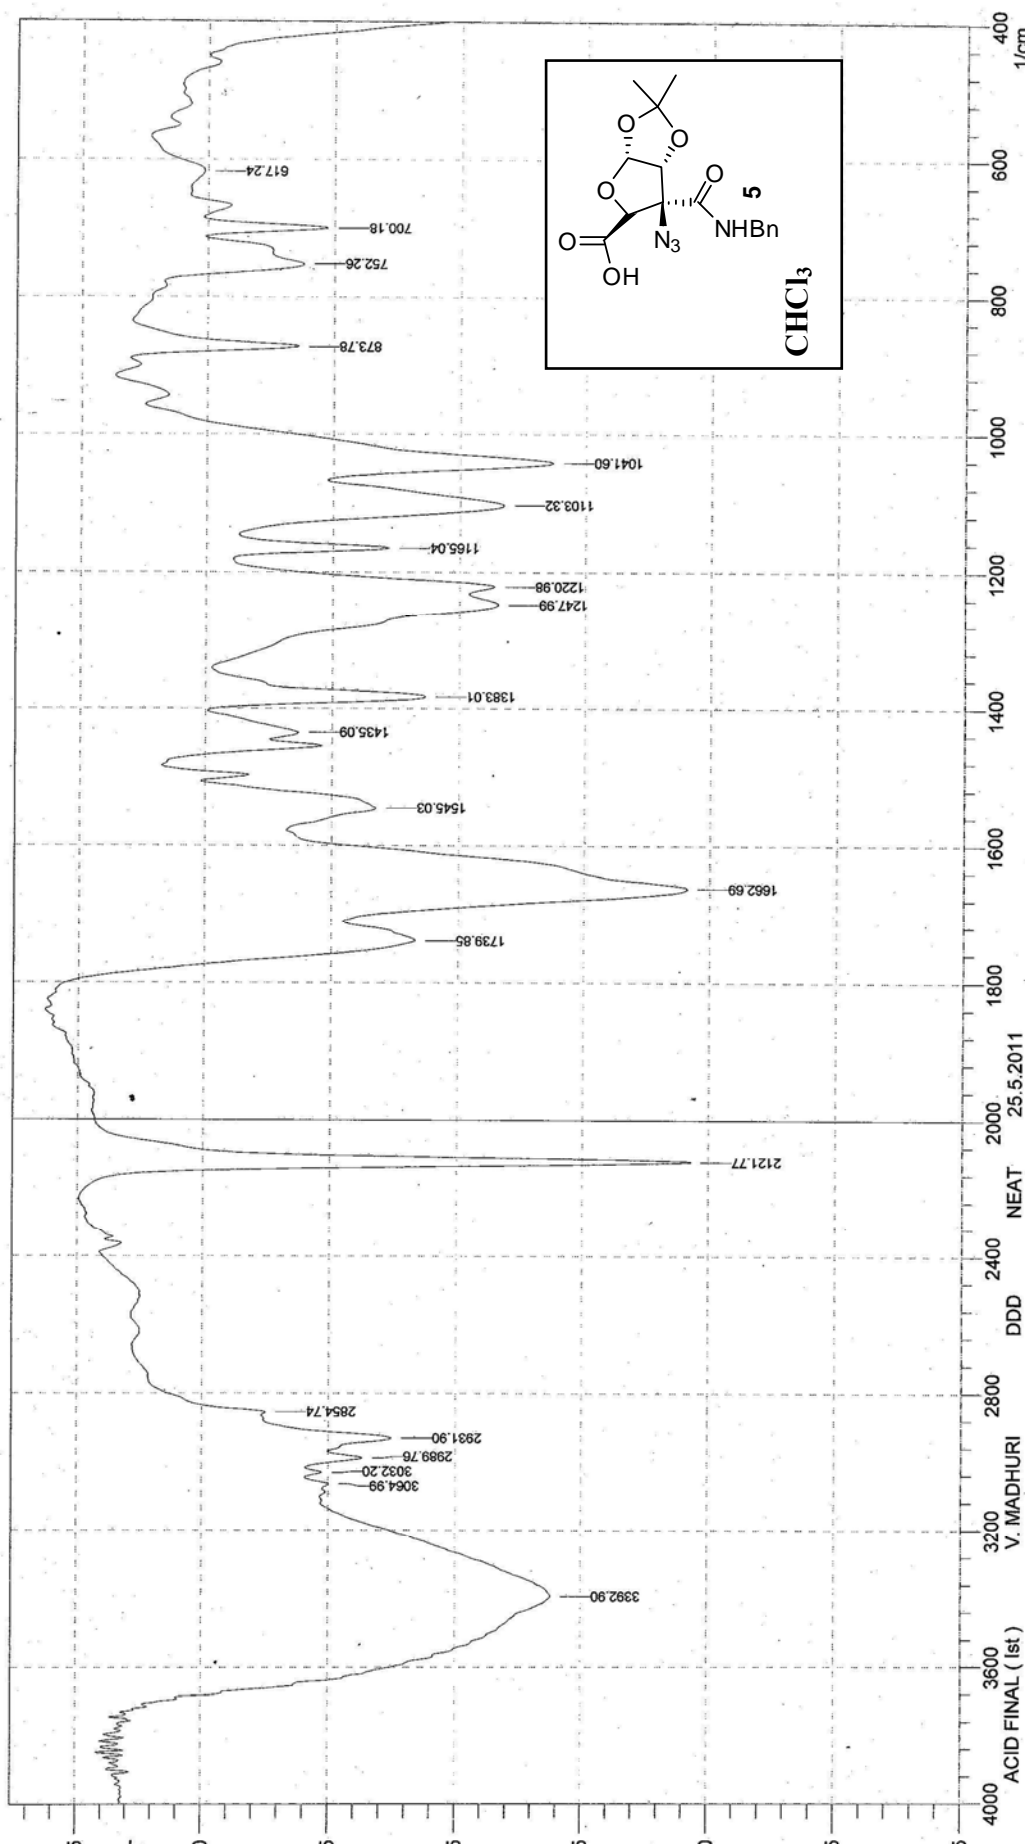

IISER PUNE

λ-24 (0.464) AM2 (Ar,20000.0,556.28,0.00,LS 3); ABS; Sm (Mn, 1x1.00); Cm (3:52)

1: TOF MS ES+  
1.05e6

CALCULATED MASS  
(M+Na)+ 399.0144

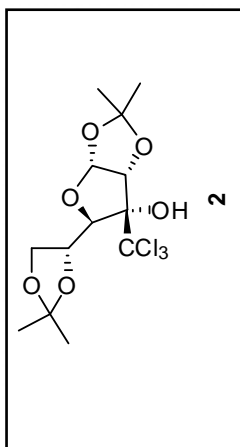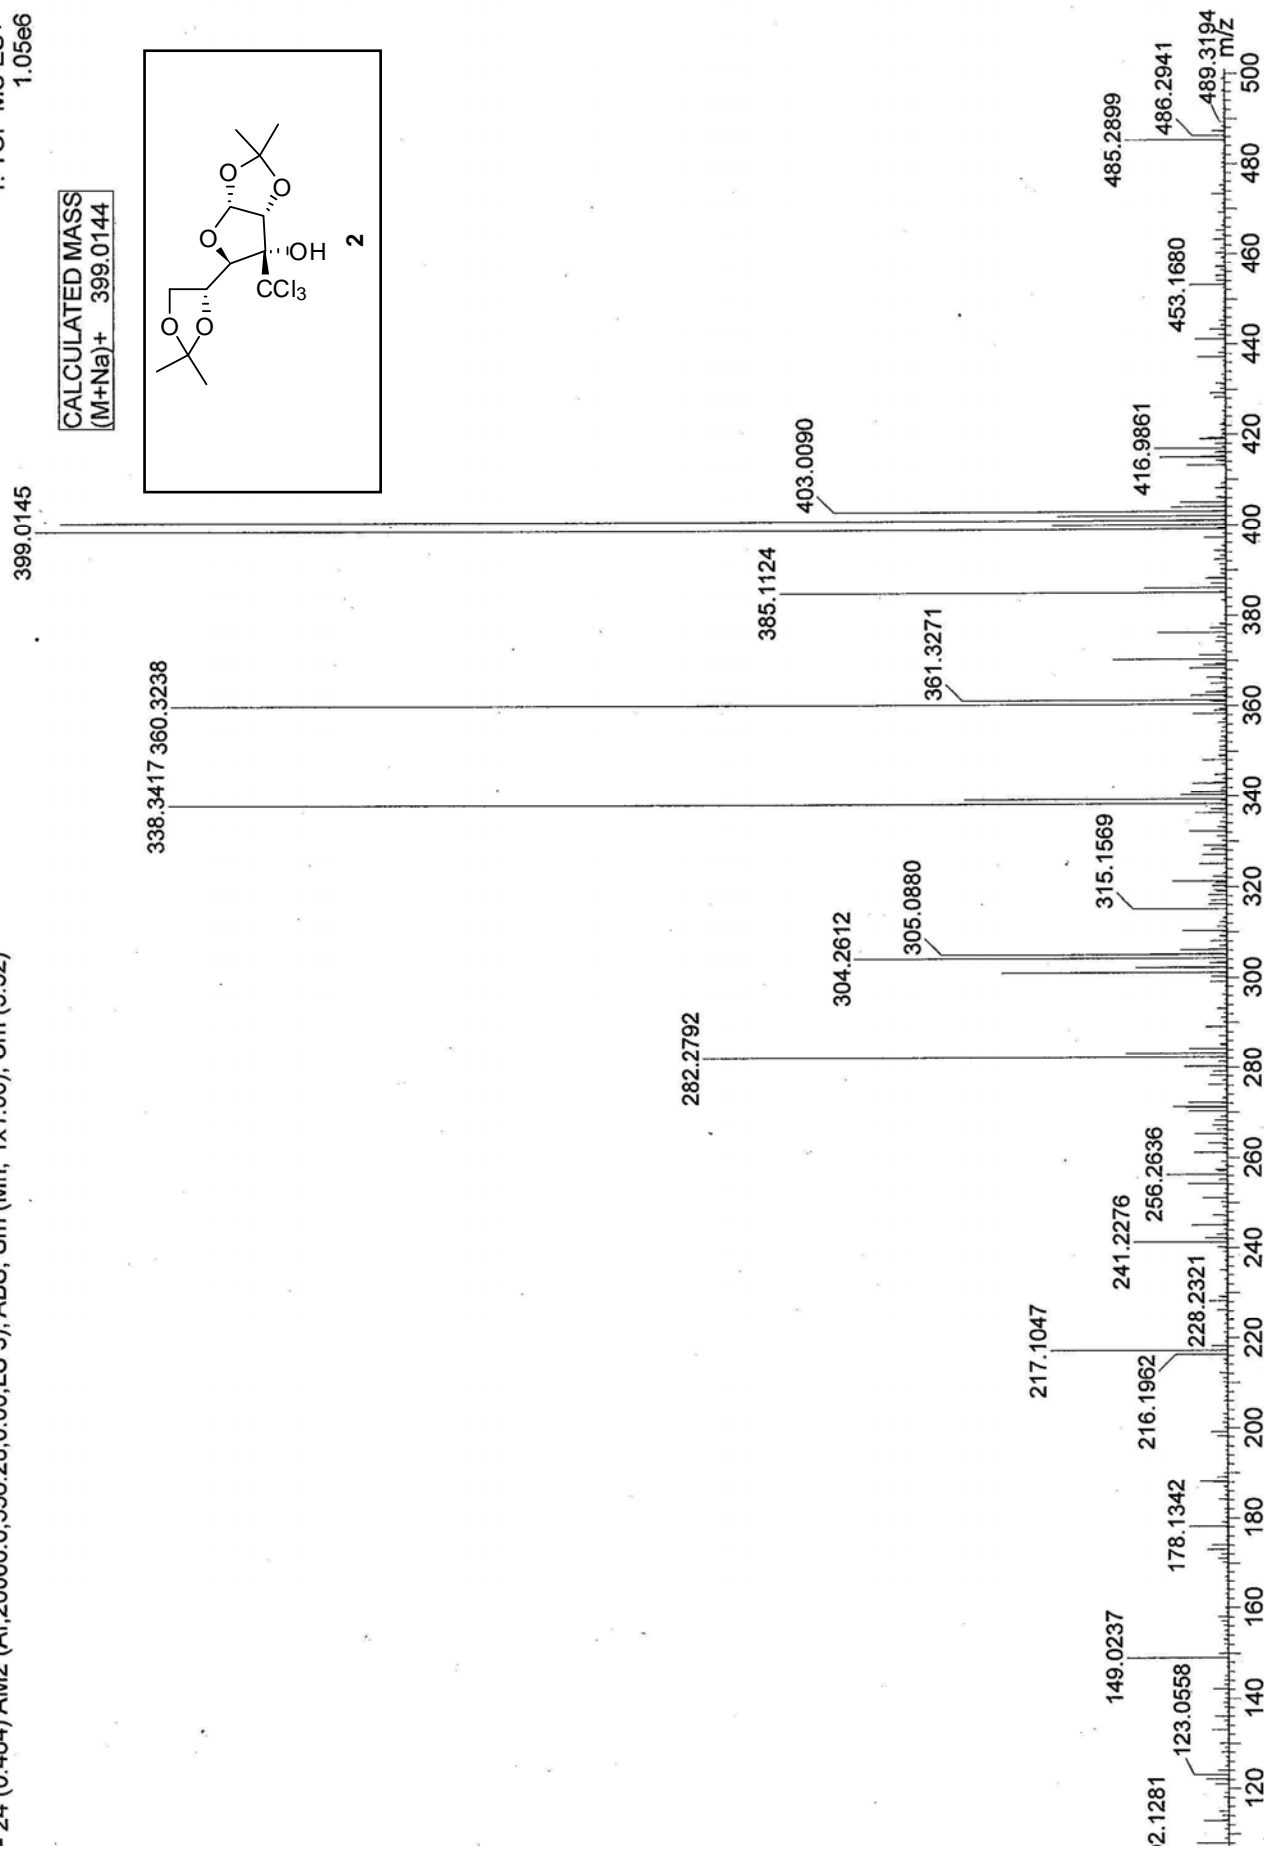

IISER PUNE

BnN3-

3hN3- 35 (0.652) AM2 (Ar, 20000.0, 556.28, 0.00, LS 3); ABS; Sm (Mn, 1x1.00); Cm (3:52)

1: TOF MS ES+  
5.5866

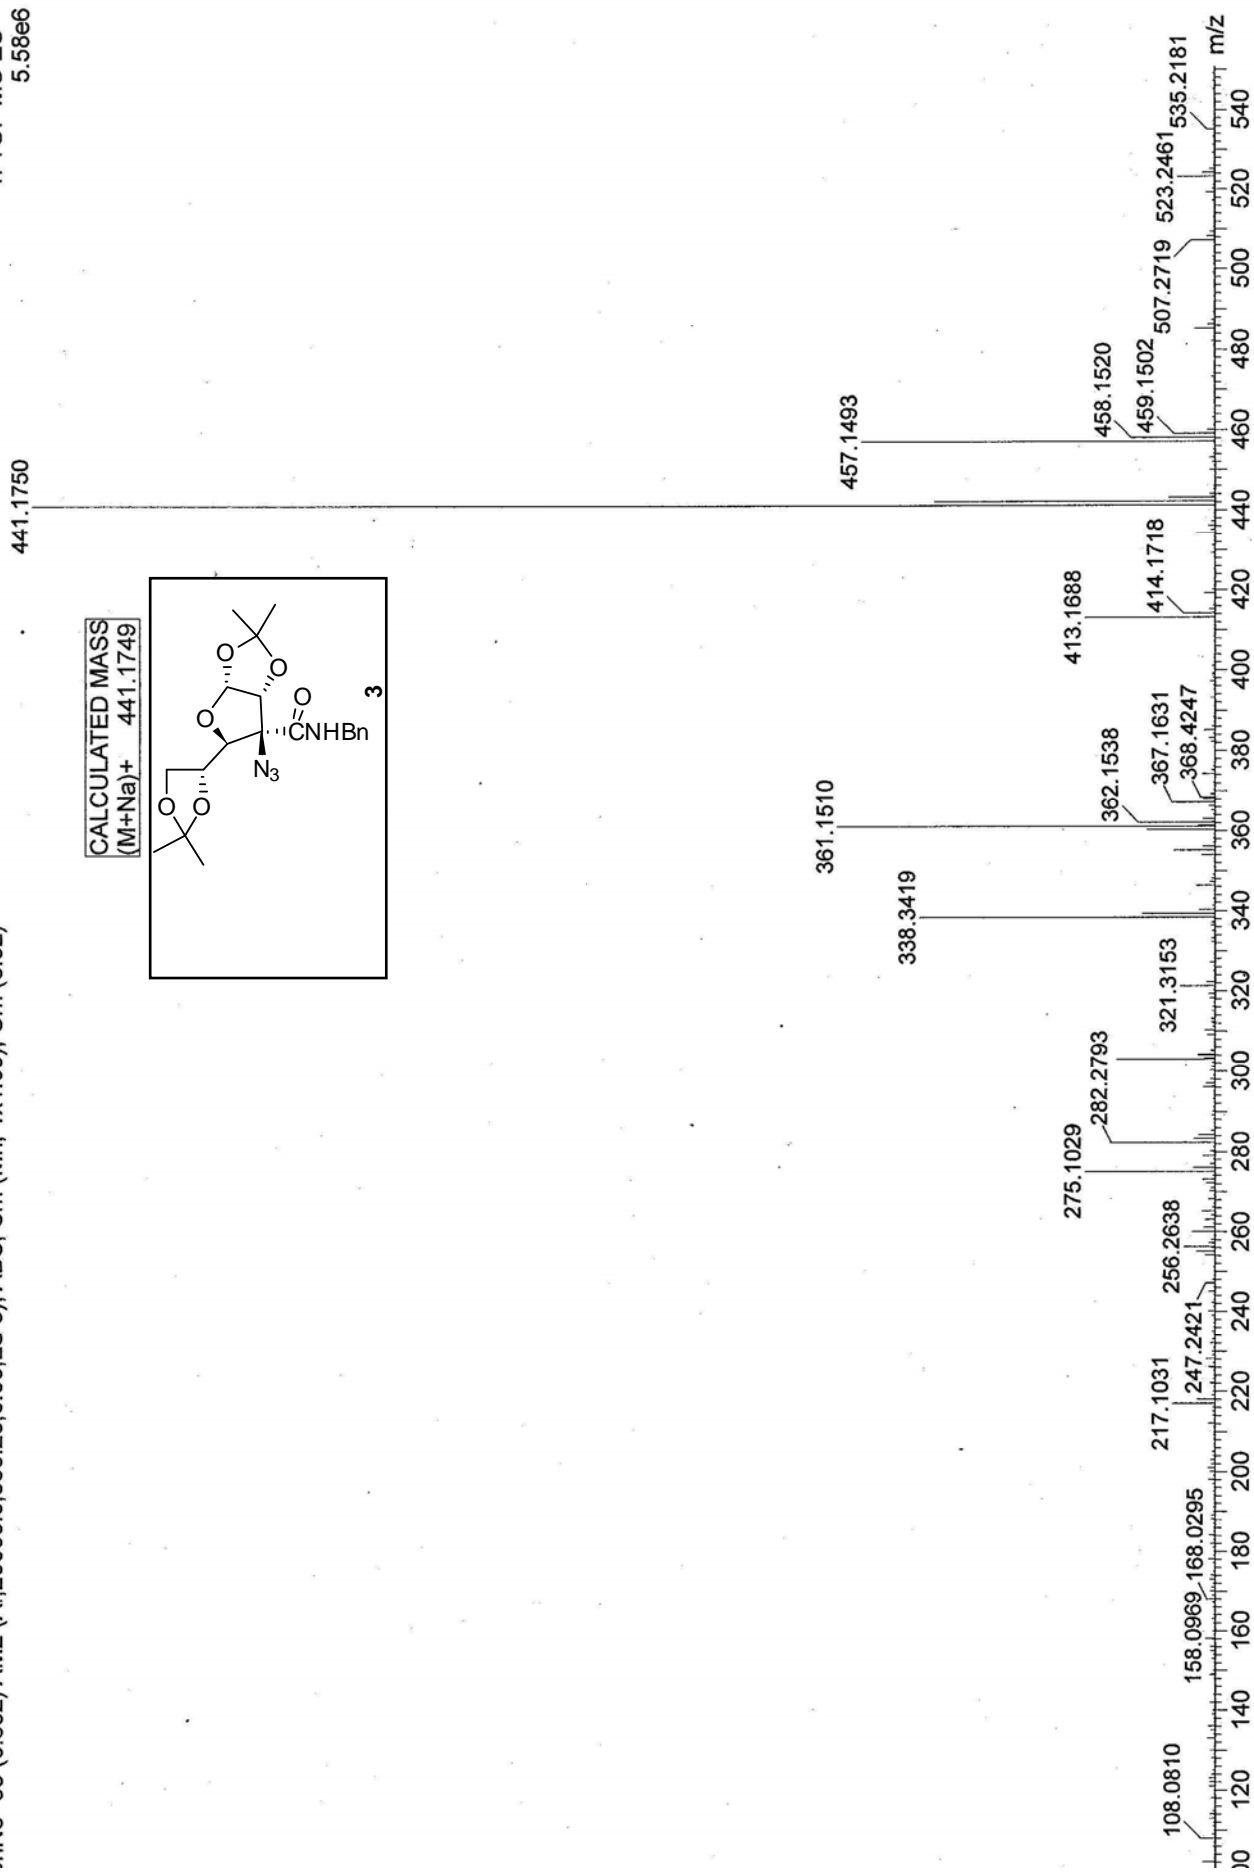

CALCULATED MASS  
(M+Na)+ 441.1749

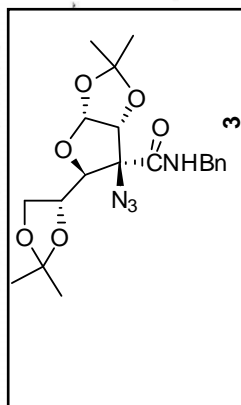



IOL  
IOL 52 (0.962) AM2 (Ar,20000.0,556.28,0.00,LS 3); ABS; Sm (Mn, 1x1.00); Cm (3:52)  
IISER PUNE  
1: TOF MS ES+  
3.66e6  
401.1436

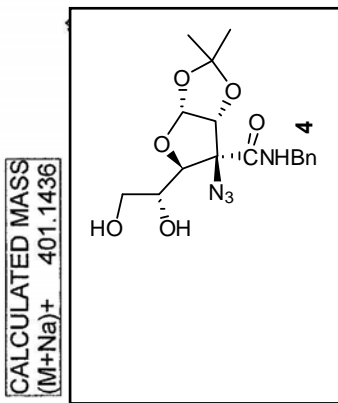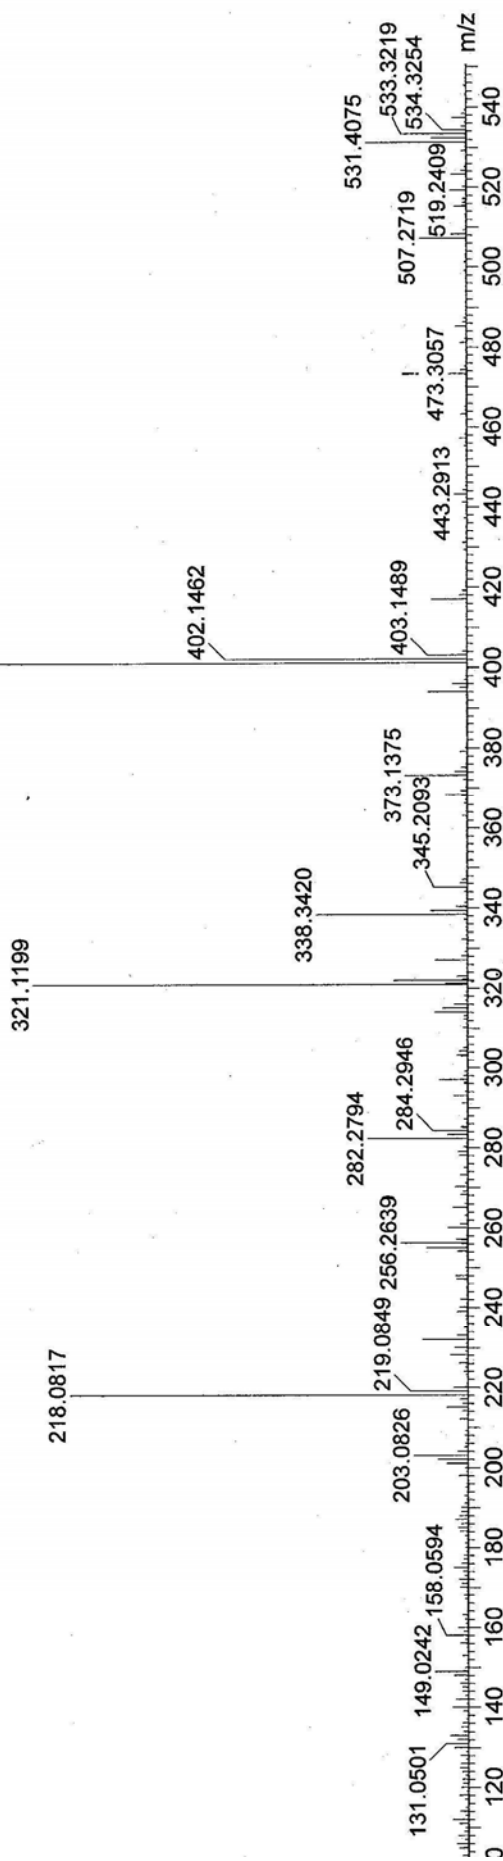



IISER PUNE

D-29 (0.550) AM2 (Ar.20000.0,556.28,0.00,LS 3); ABS; Sm (Mn, 1x1.00); Cm (1:52)

1: TOF MS ES+  
3.82e6

CALCULATED MASS  
(M+Na)<sup>+</sup> 385.1123

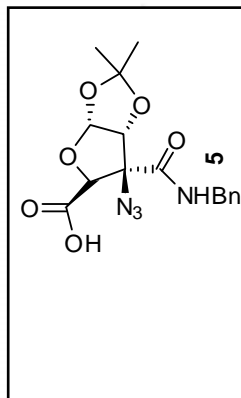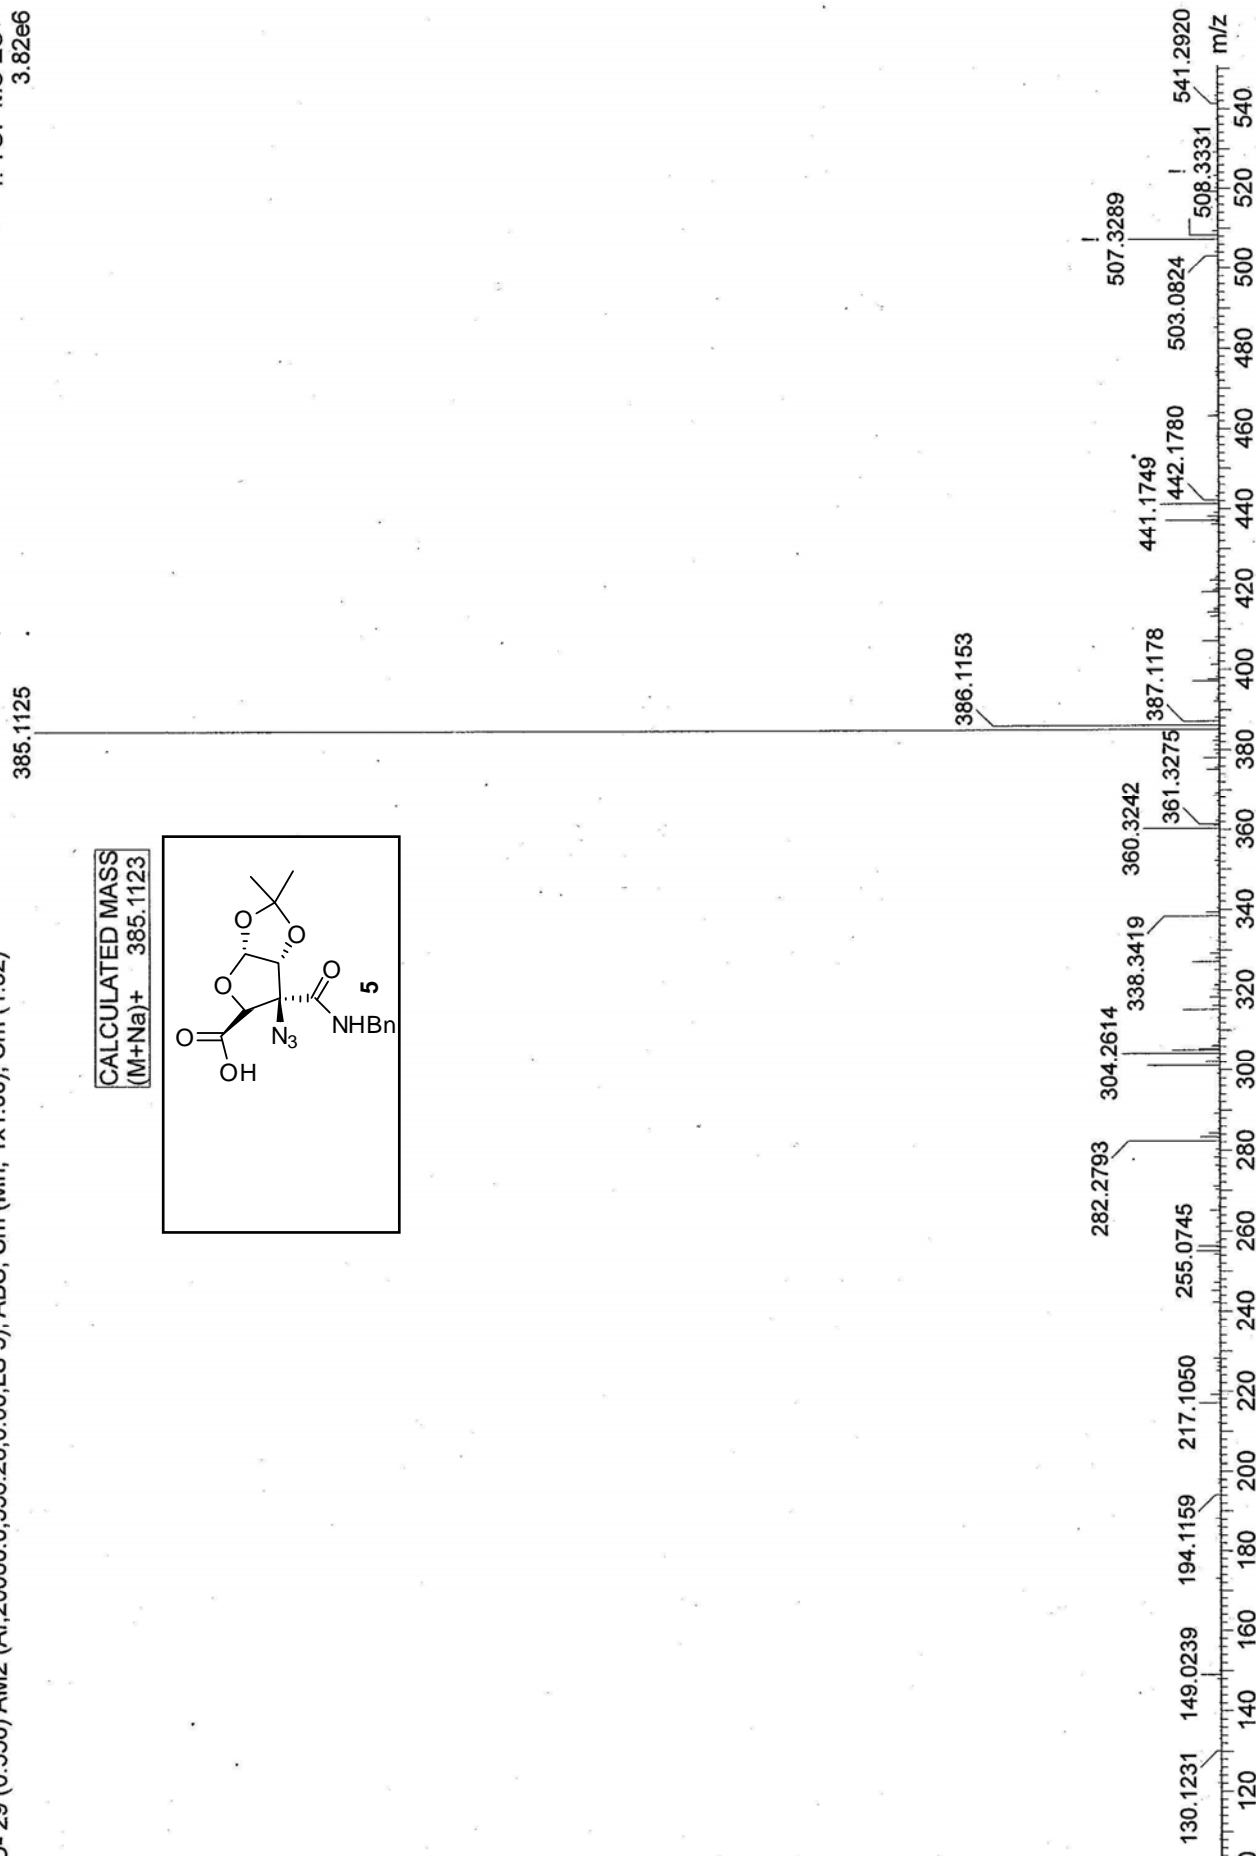

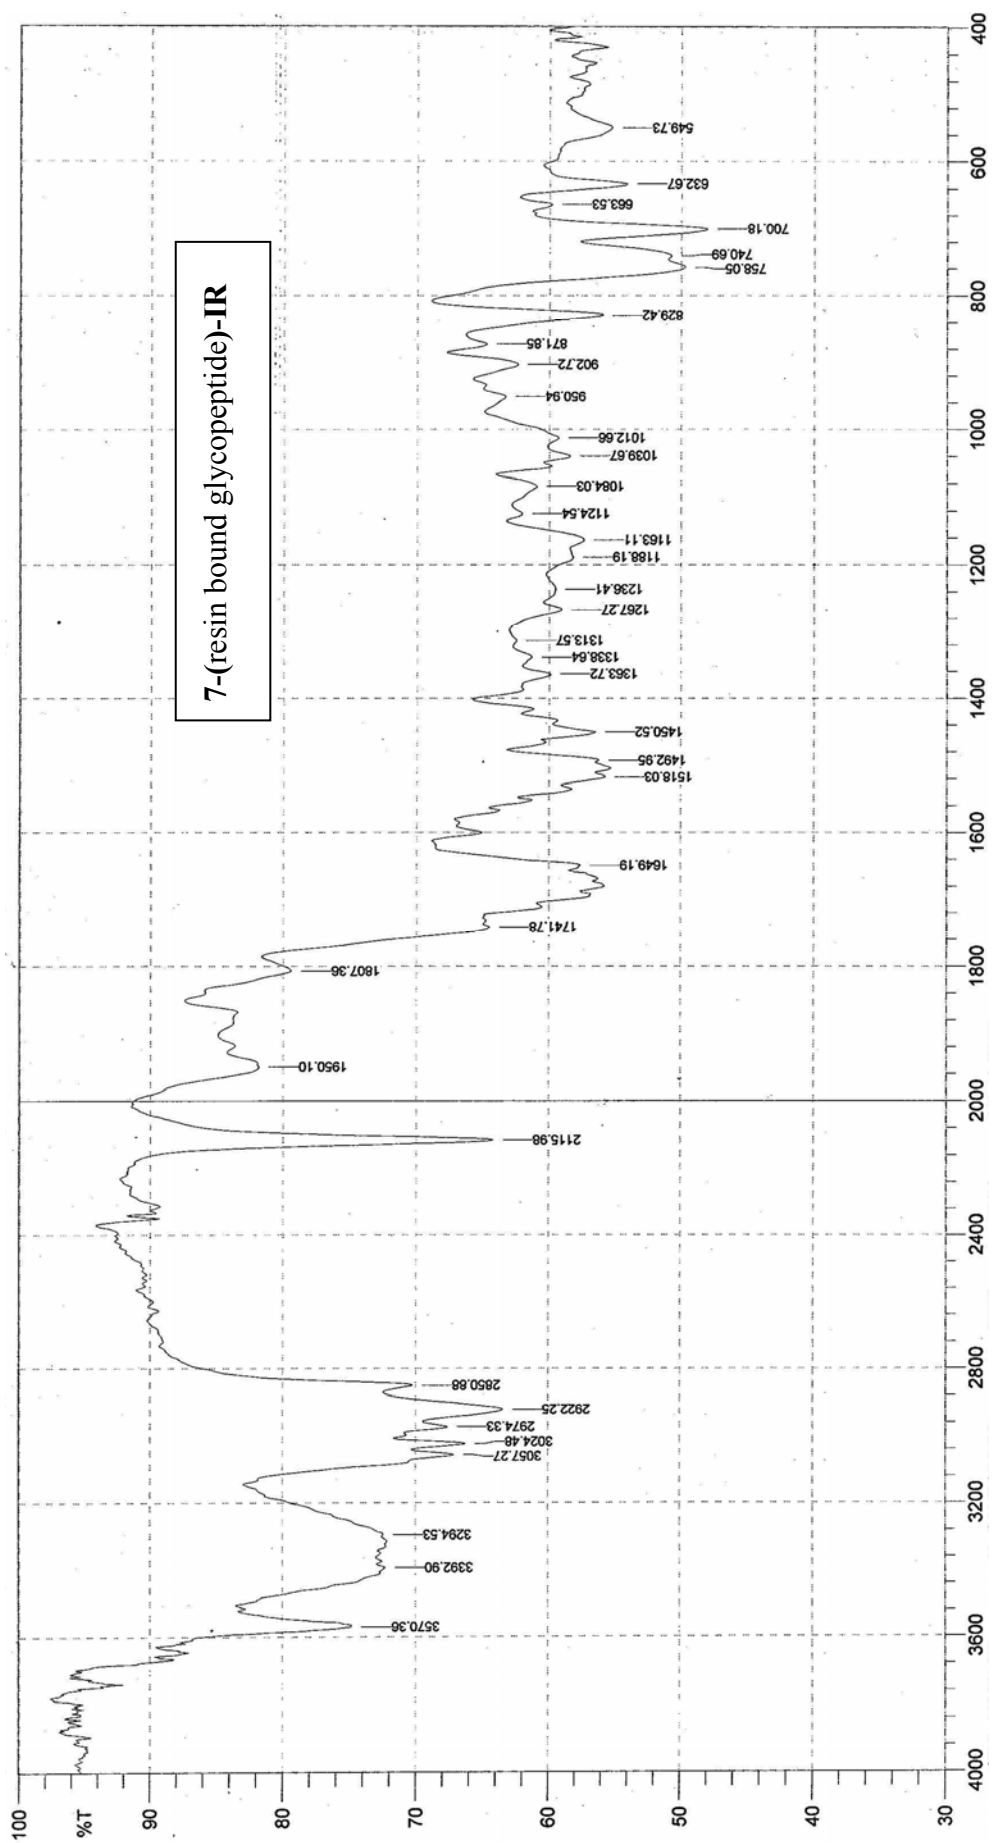

**Glycopeptide 8-CRUDE**

Flow Rate : 1 ml / min

<Chromatogram>

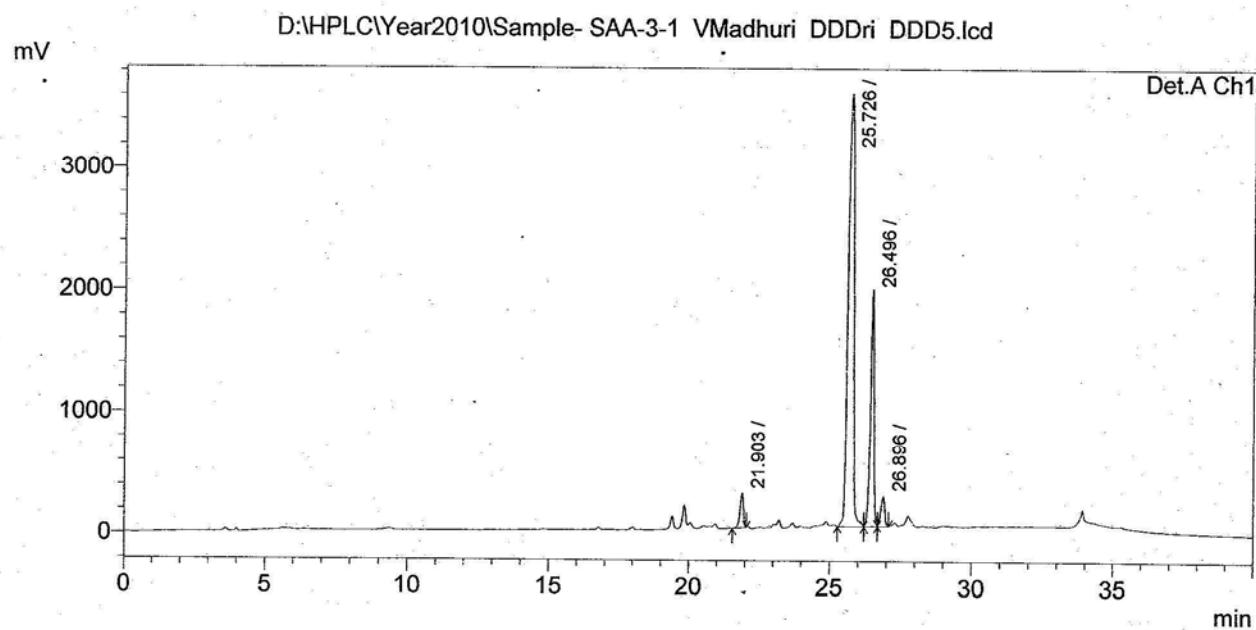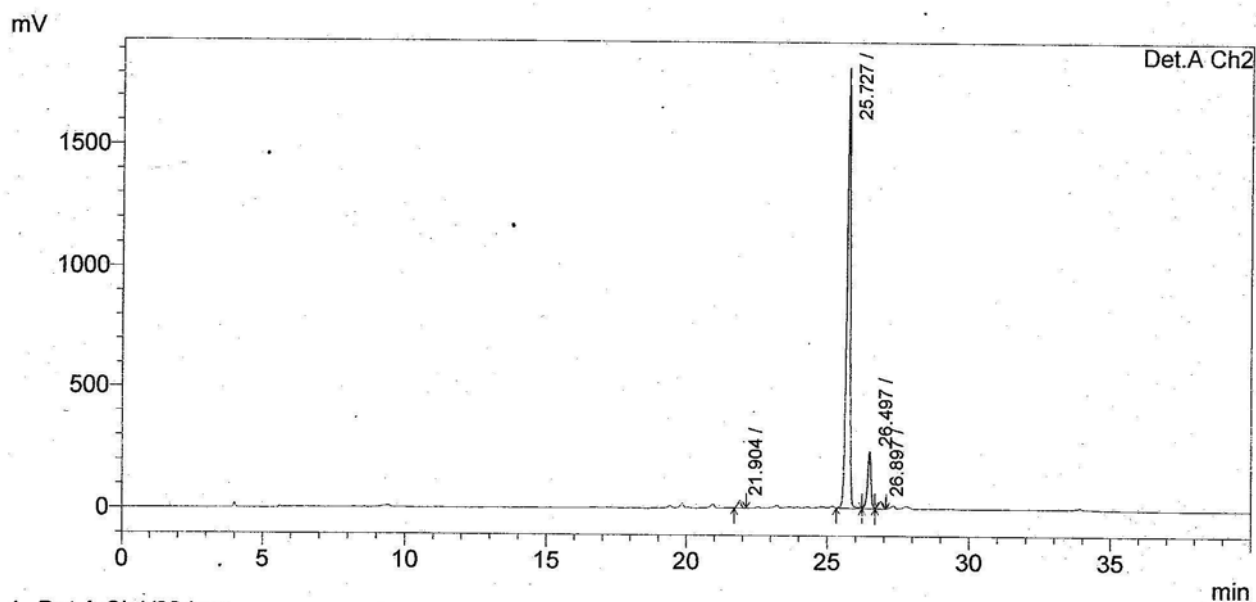

1 Det.A Ch1/224nm  
2 Det.A Ch2/260nm

**Glycopeptide 8- PURE**

Flow Rate : 1 ml / min  
<Chromatogram>

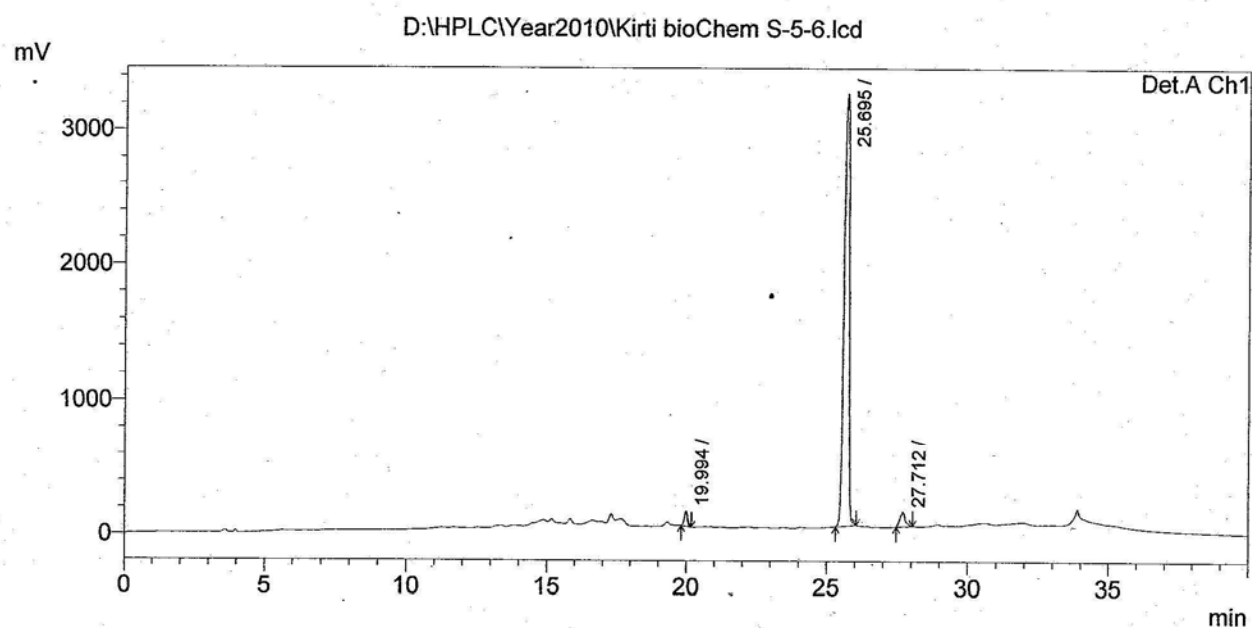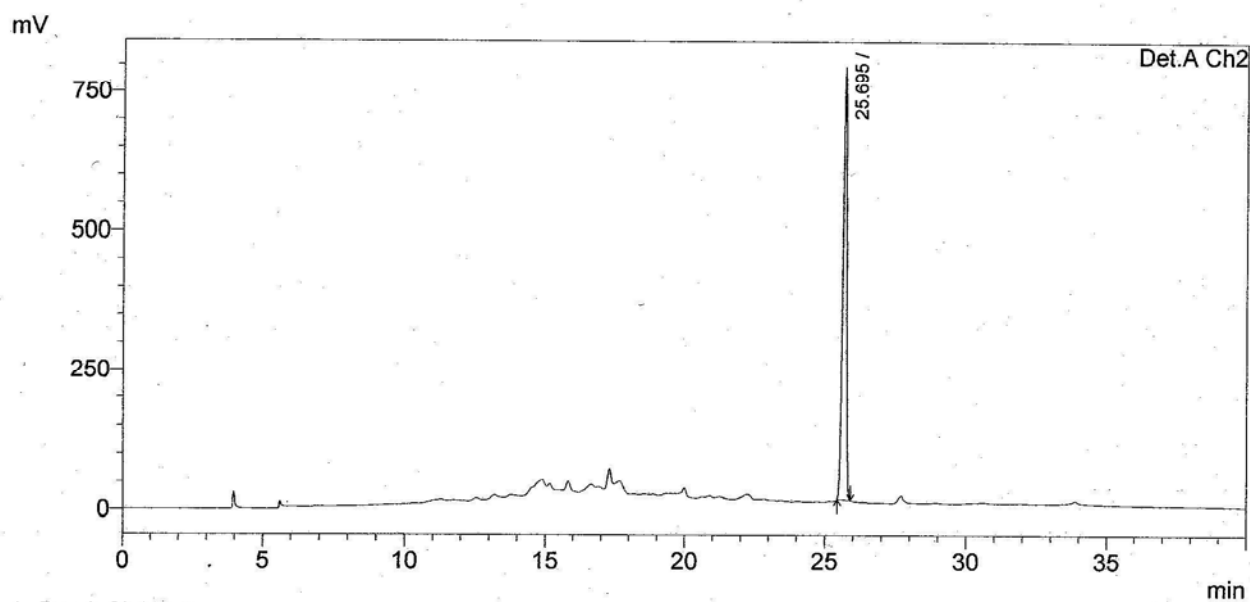

1 Det.A Ch1/224nm  
2 Det.A Ch2/260nm

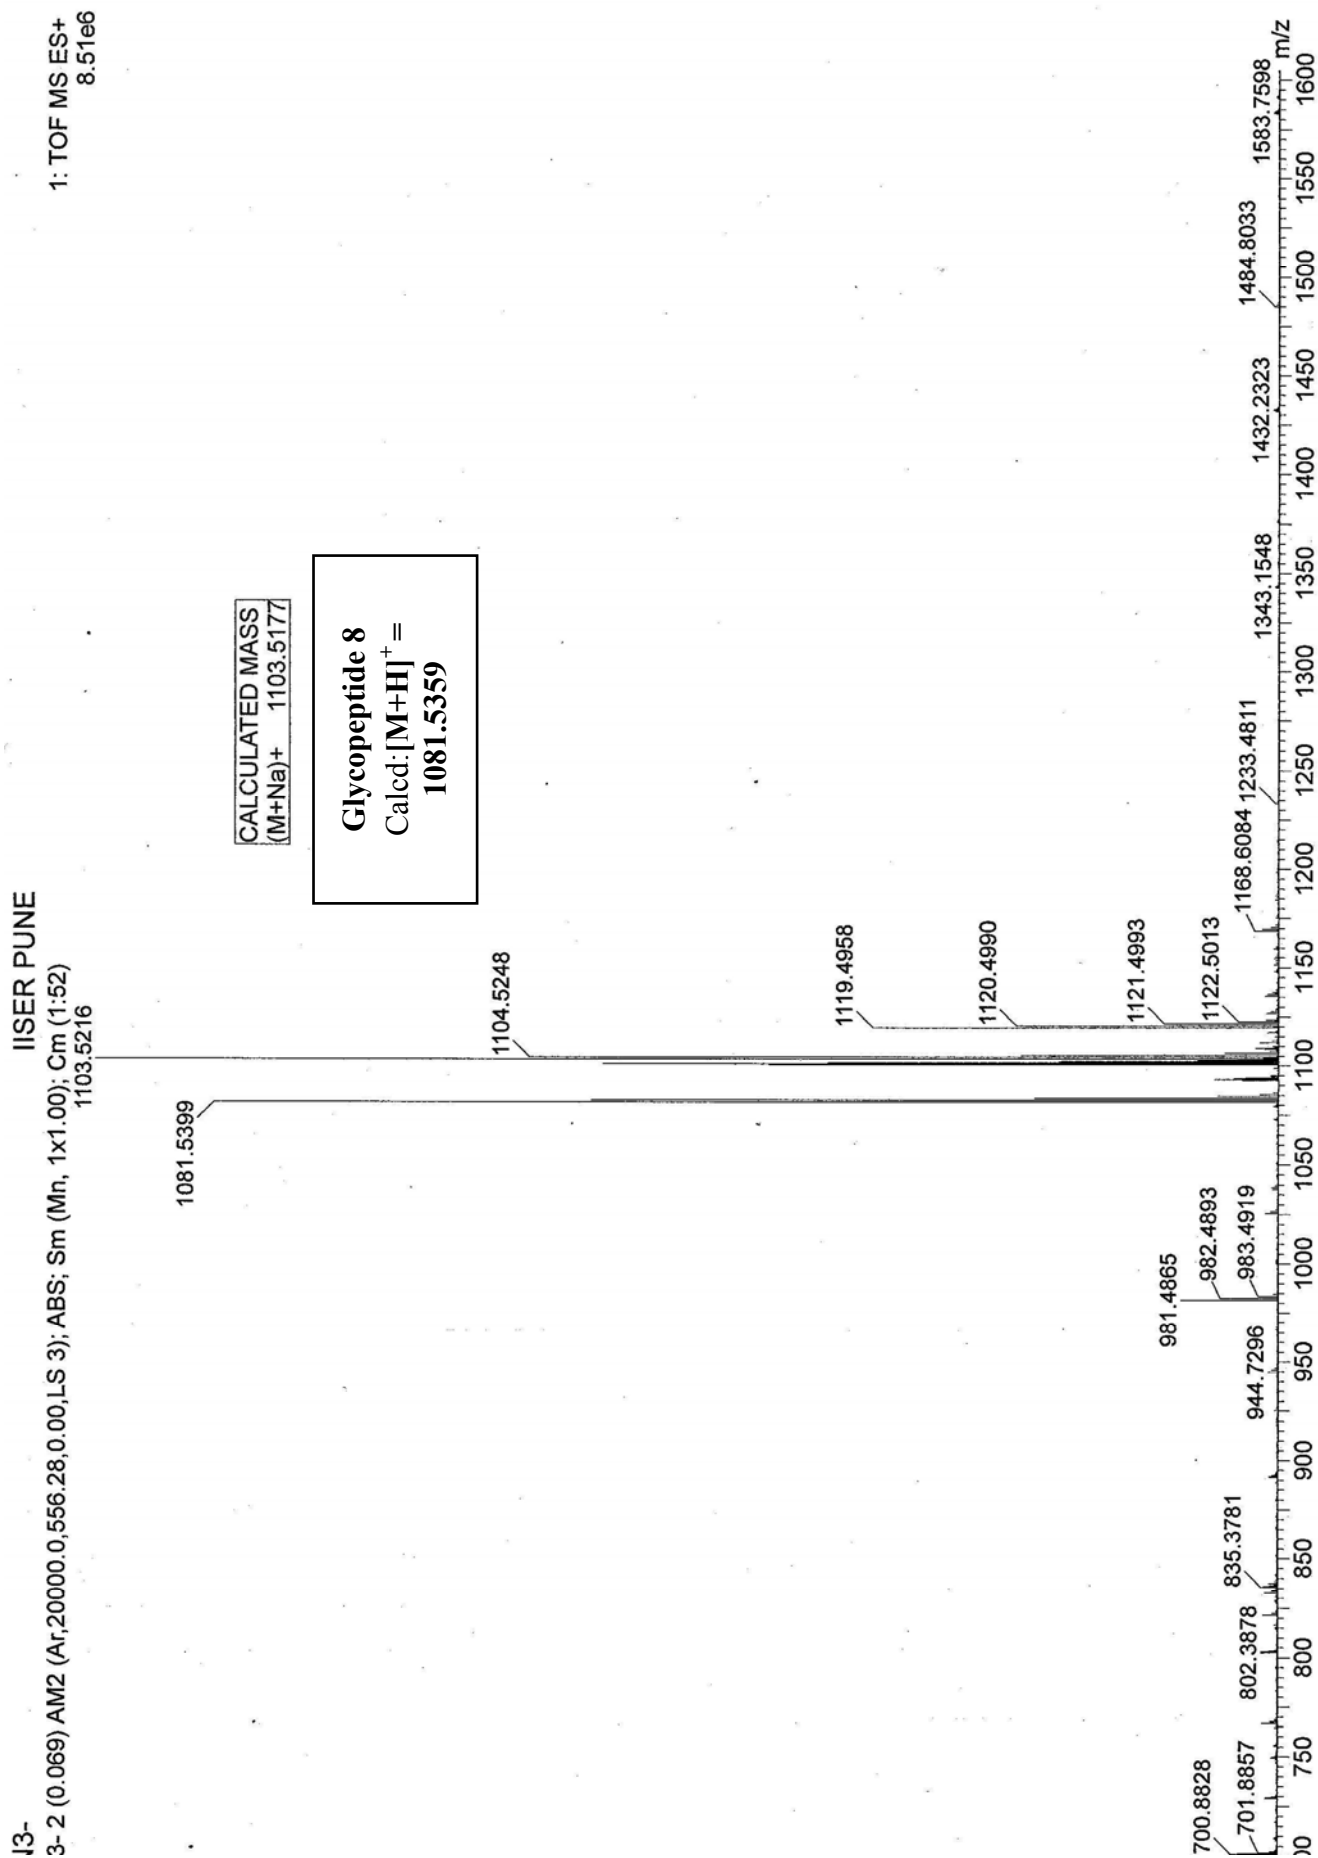

### 2D NMR Studies of Glycopeptide 8 in CD<sub>3</sub>CN on 500MHz at 295K

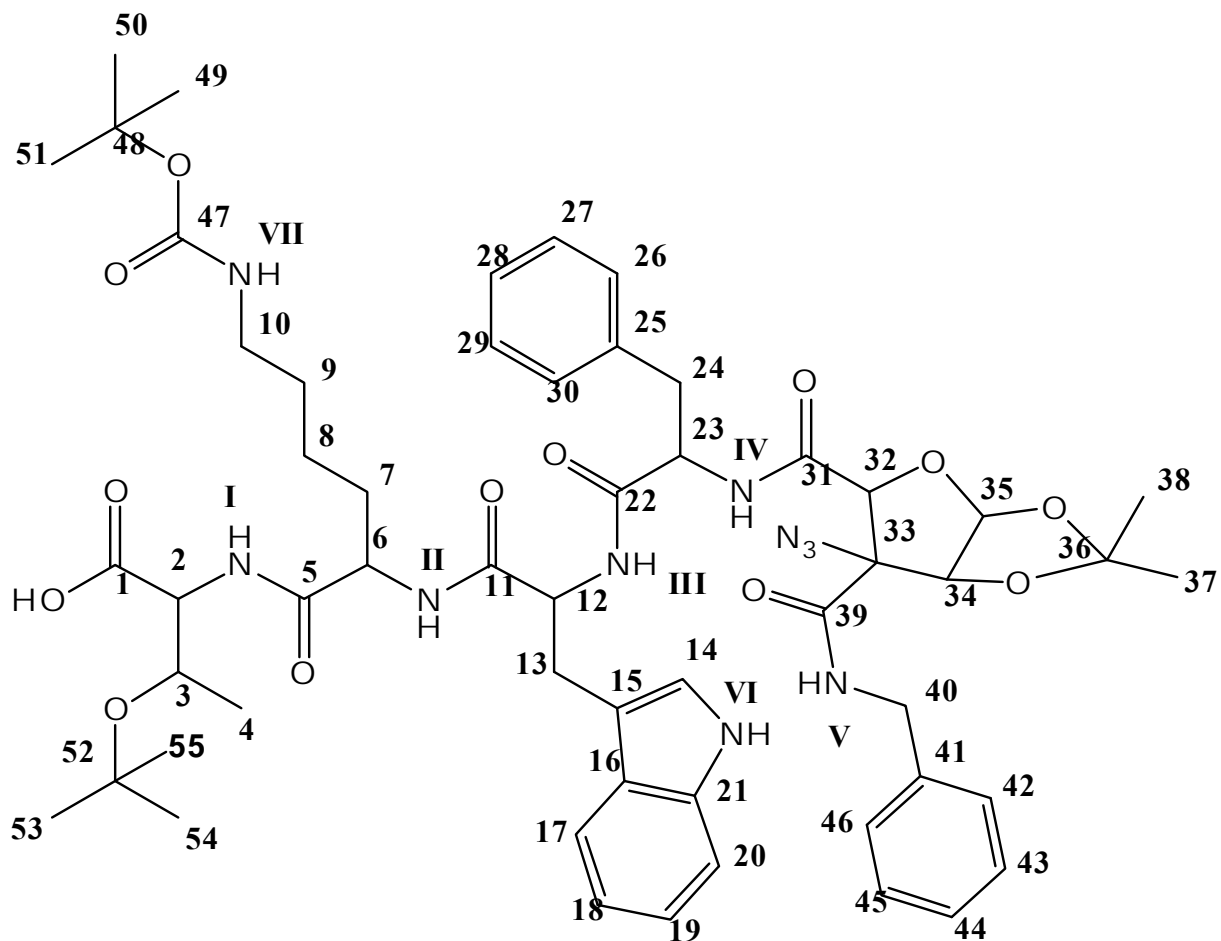

Glycopeptide 8 chemical structure with numbering

| <b>Glycopeptide 8 - <sup>1</sup>H, <sup>13</sup>C HSQC Assignment</b> |                               |
|-----------------------------------------------------------------------|-------------------------------|
| <b><sup>1</sup>H (δ/ppm)</b>                                          | <b><sup>13</sup>C (δ/ppm)</b> |
| 1.16(C53H,C54H,C55H)                                                  | 28.4                          |
| 1.39(C49H,C50H,C51H)                                                  | 28.5                          |
| 4.39(C2H)                                                             | 58.3                          |
| 4.21(C3H)                                                             | 67.7                          |
| 1.11(C4H)                                                             | 20.2                          |
| 4.35(C6H)                                                             | 53.9                          |
| 1.73,1.55(C7H)                                                        | 32.3                          |
| 1.20(C8H)                                                             | 23.2                          |
| 1.36(C9H)                                                             | 30.2                          |
| 2.95(C10H)                                                            | 40.9                          |
| 4.64(C12H)                                                            | 54.9                          |
| 3.22,3.10(C13H)                                                       | 28.5                          |
| 7.09(C14H)                                                            | 124.8                         |
| 7.58(C17H)                                                            | 119.4                         |
| 7.04(C18H)                                                            | 119.9                         |
| 7.11(C19H)                                                            | 122.4                         |
| 7.37(C20H)                                                            | 112.2                         |
| 4.53(C23H)                                                            | 55.2                          |
| 3.04/3.05/3.08/3.07(C24H)                                             | 38.0                          |
| 7.19(C26H),7.16(C30H)                                                 | 130.3                         |
| 7.23(C27H,C29H)                                                       | 129.1                         |
| 7.20(C28H)                                                            | 127.6                         |
| 4.85(C32H)                                                            | 78.8                          |
| 4.86(C34H)                                                            | 85.3                          |
| 5.92(C35H)                                                            | 104.6                         |
| 4.43(C40H)                                                            | 43.8                          |
| 7.29(C42H,C46H)                                                       | 128.0                         |
| 7.27(C44H)                                                            | 128.0                         |
| 7.33(C43H,C45H)                                                       | 129.4                         |
| 1.50(C37H)                                                            | 26.7                          |
| 1.33(C38H)                                                            | 27.1                          |



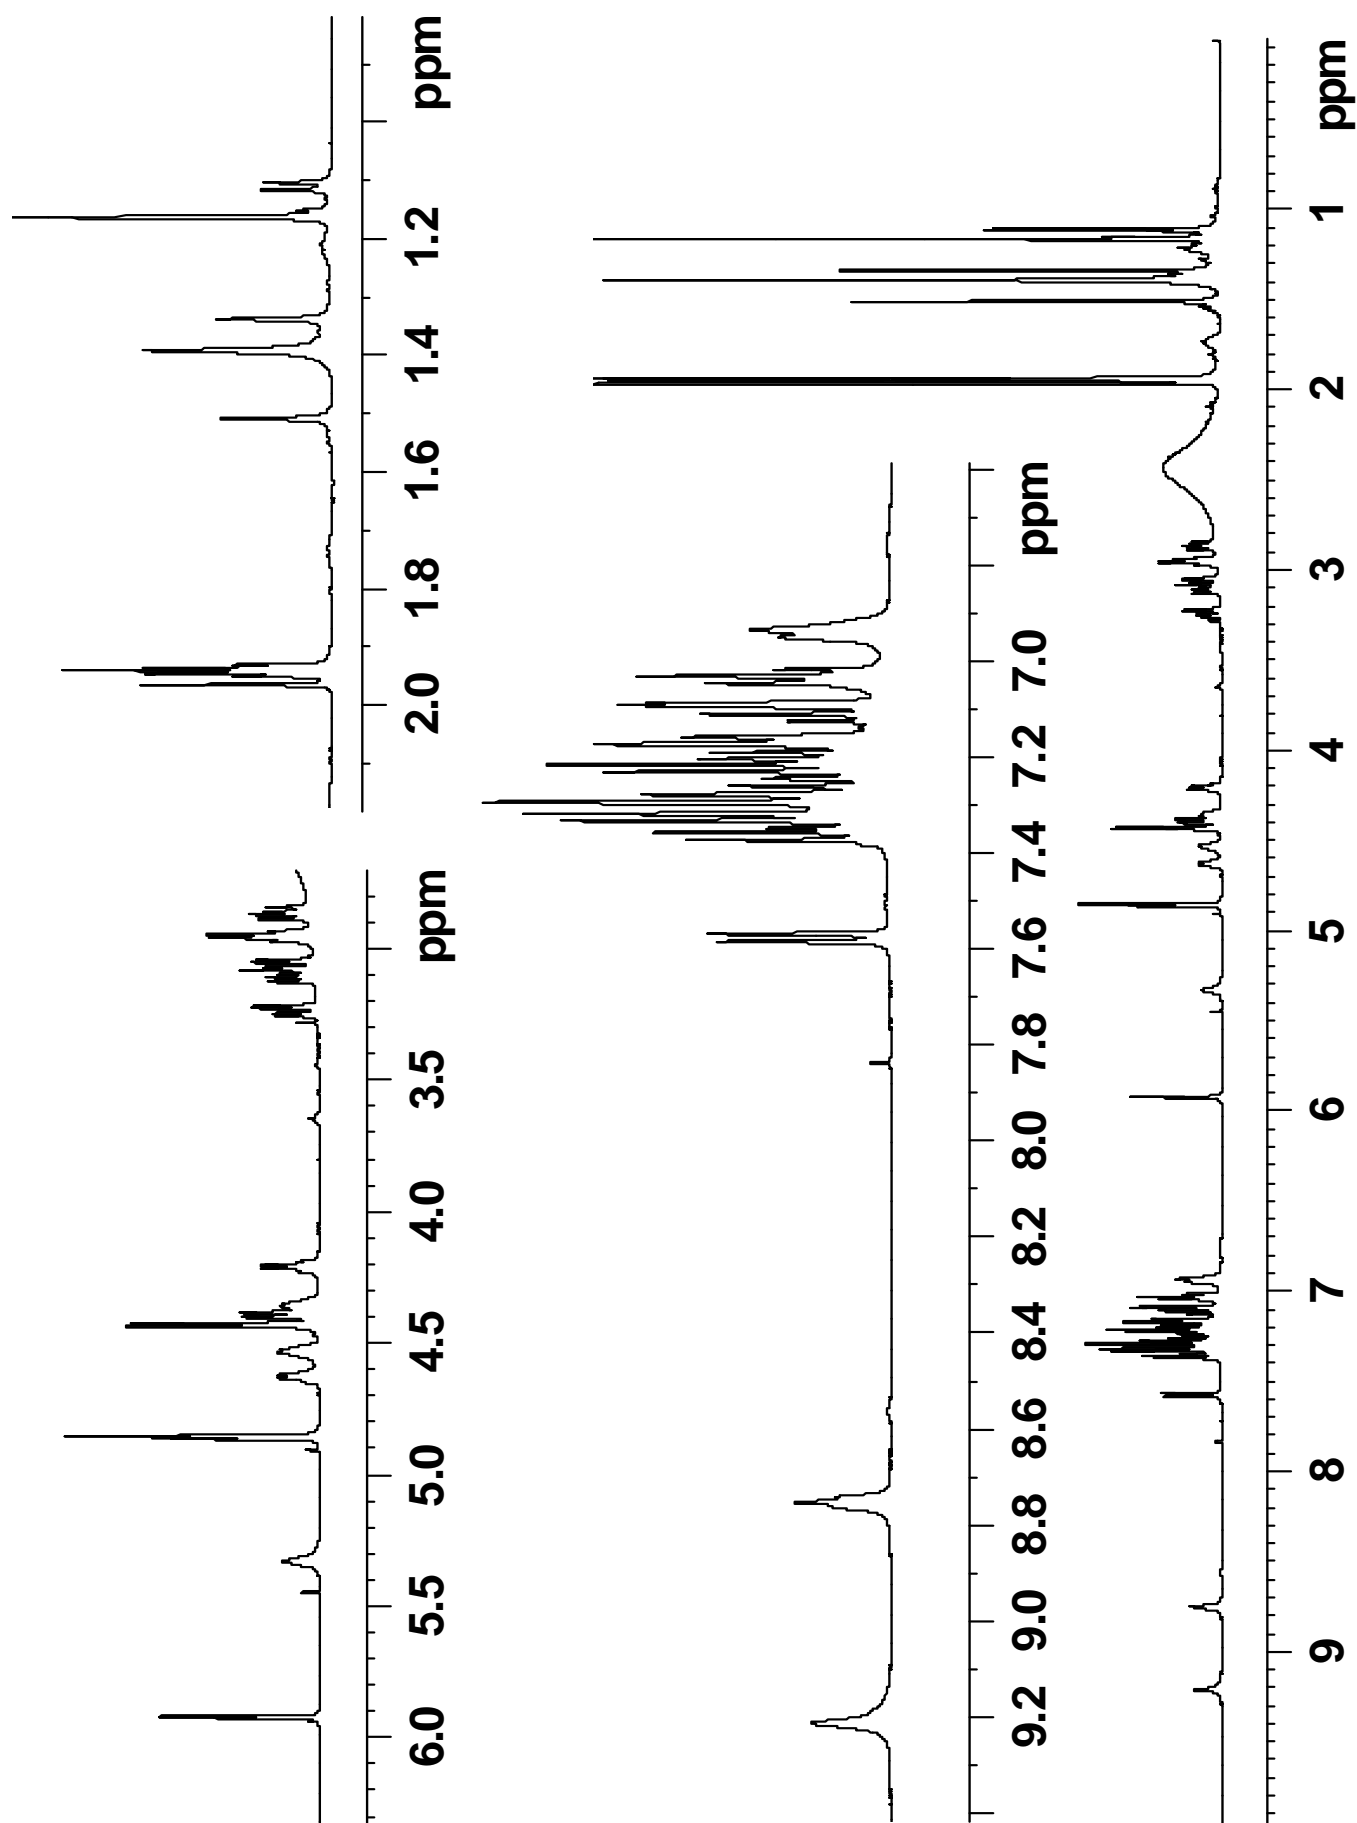

### $^{13}\text{C}$ NMR of Glycopeptide 8

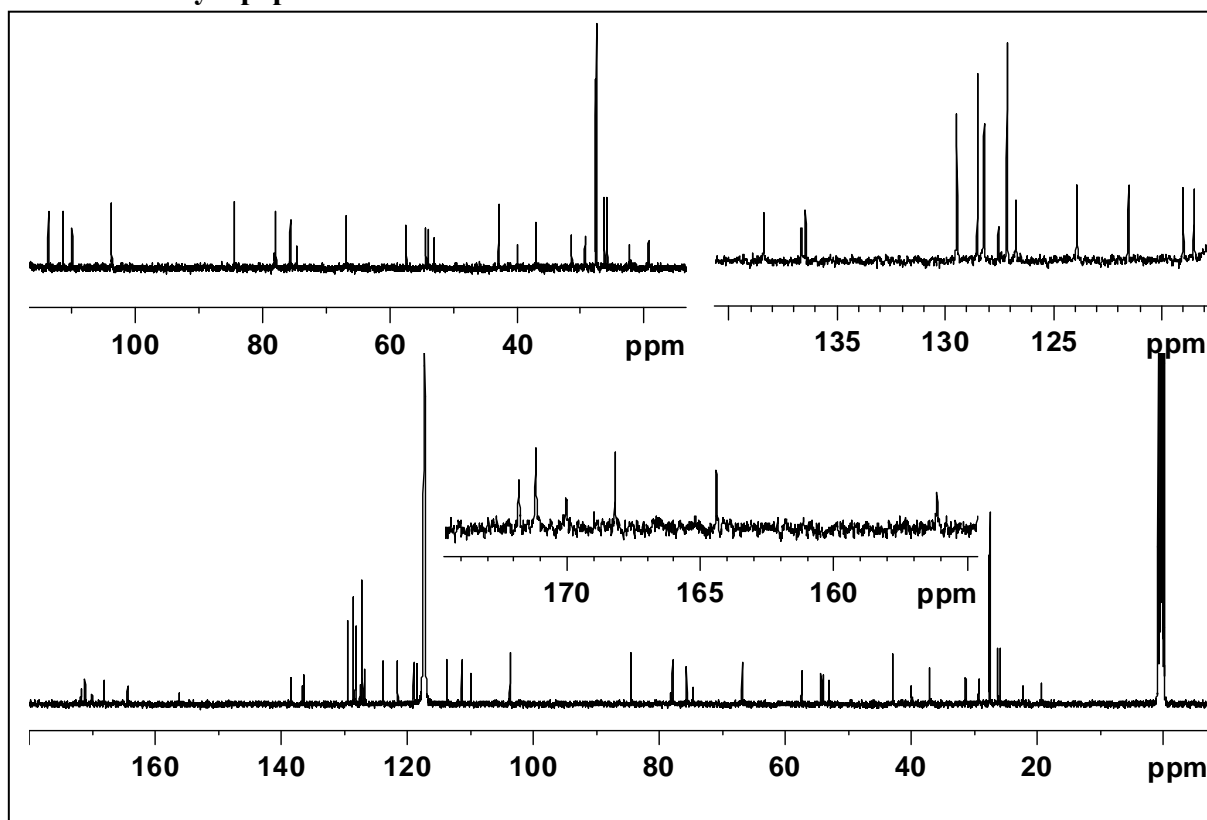

### DEPT

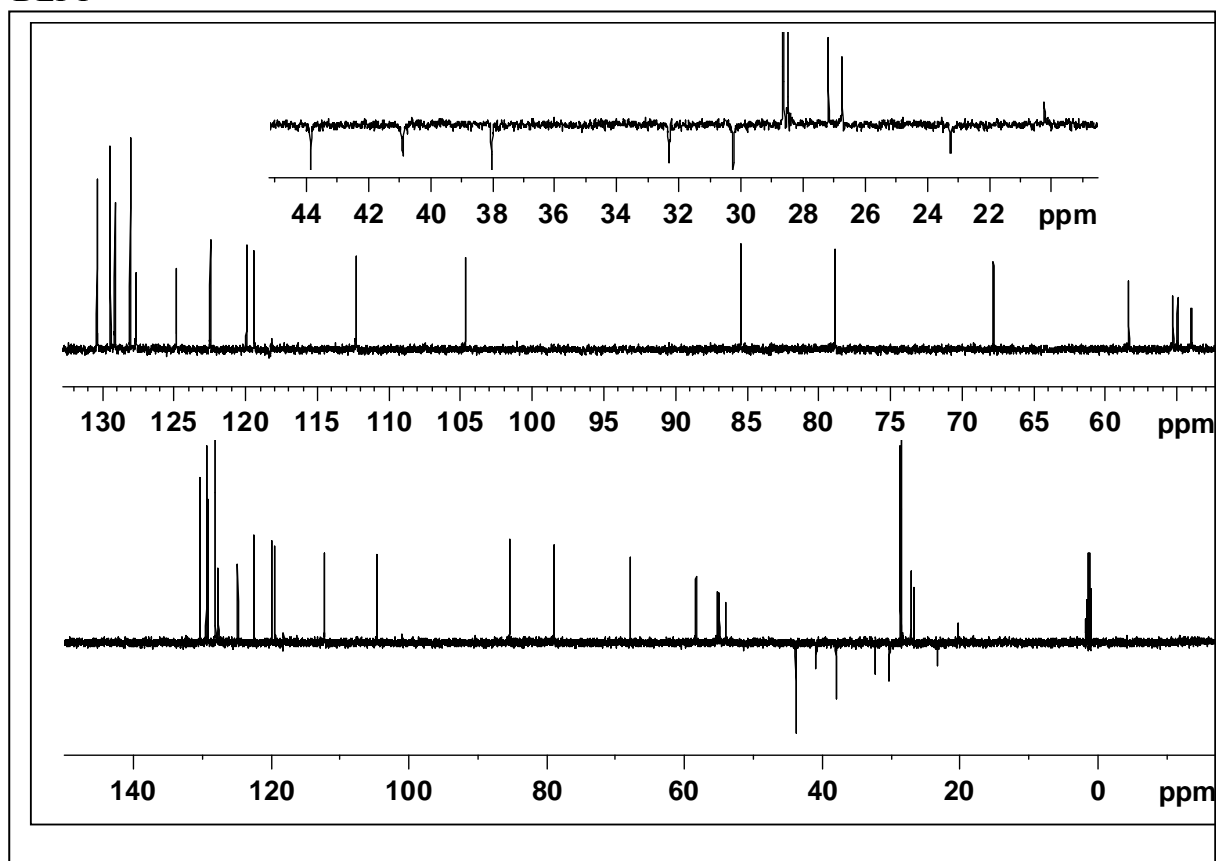

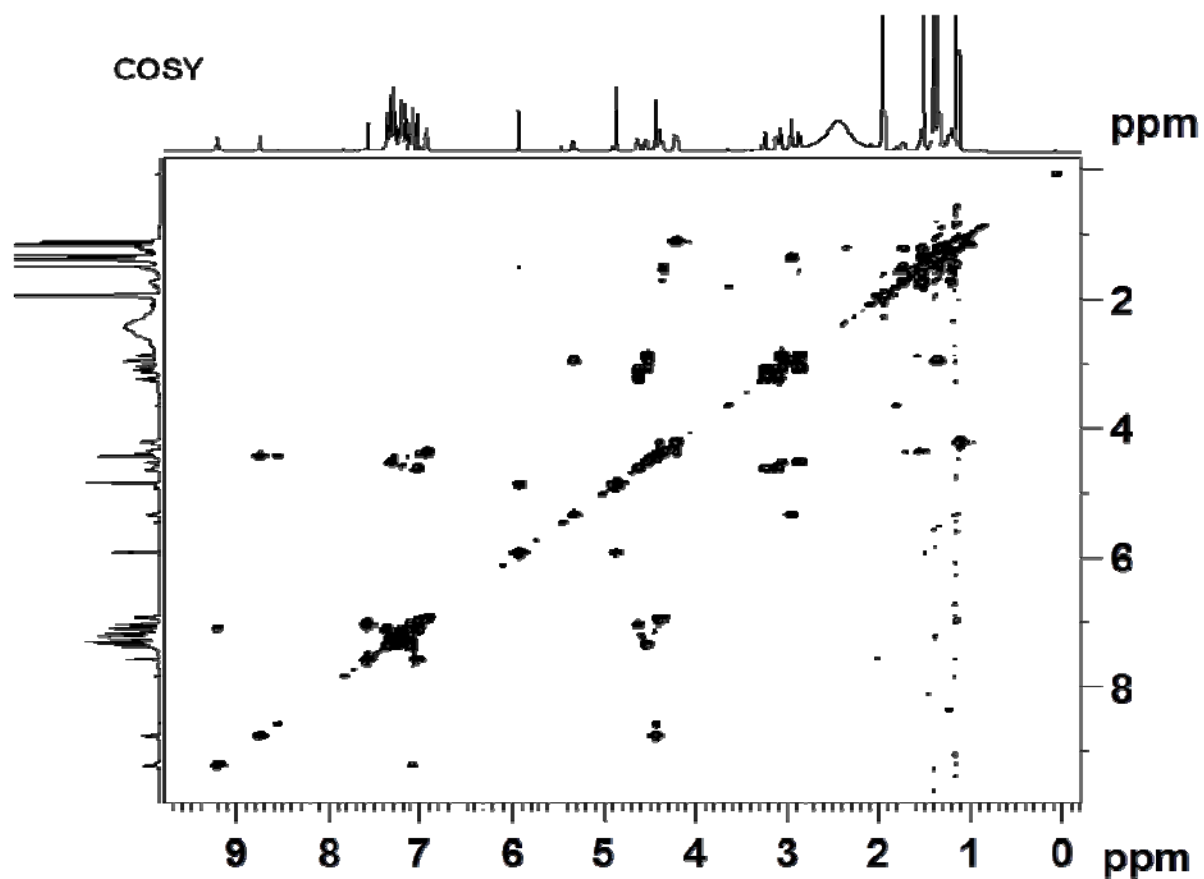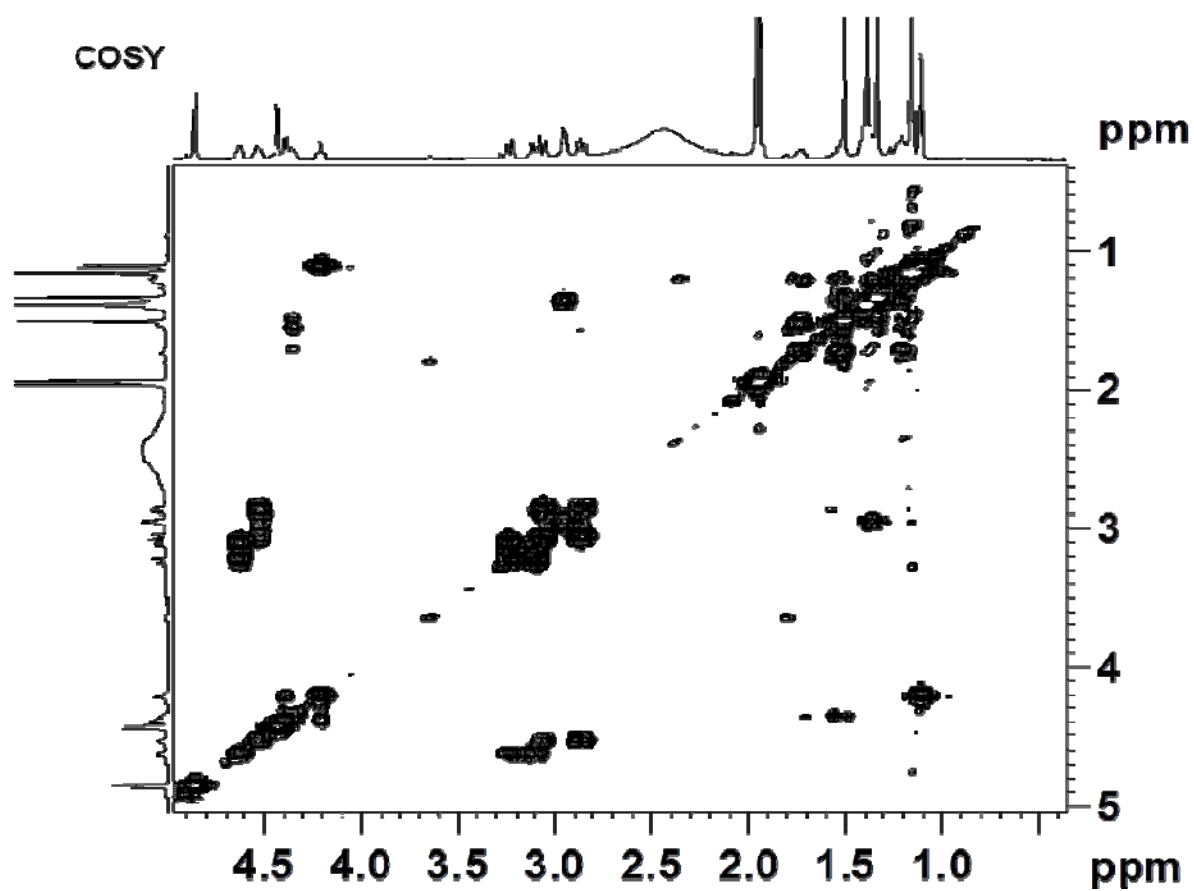

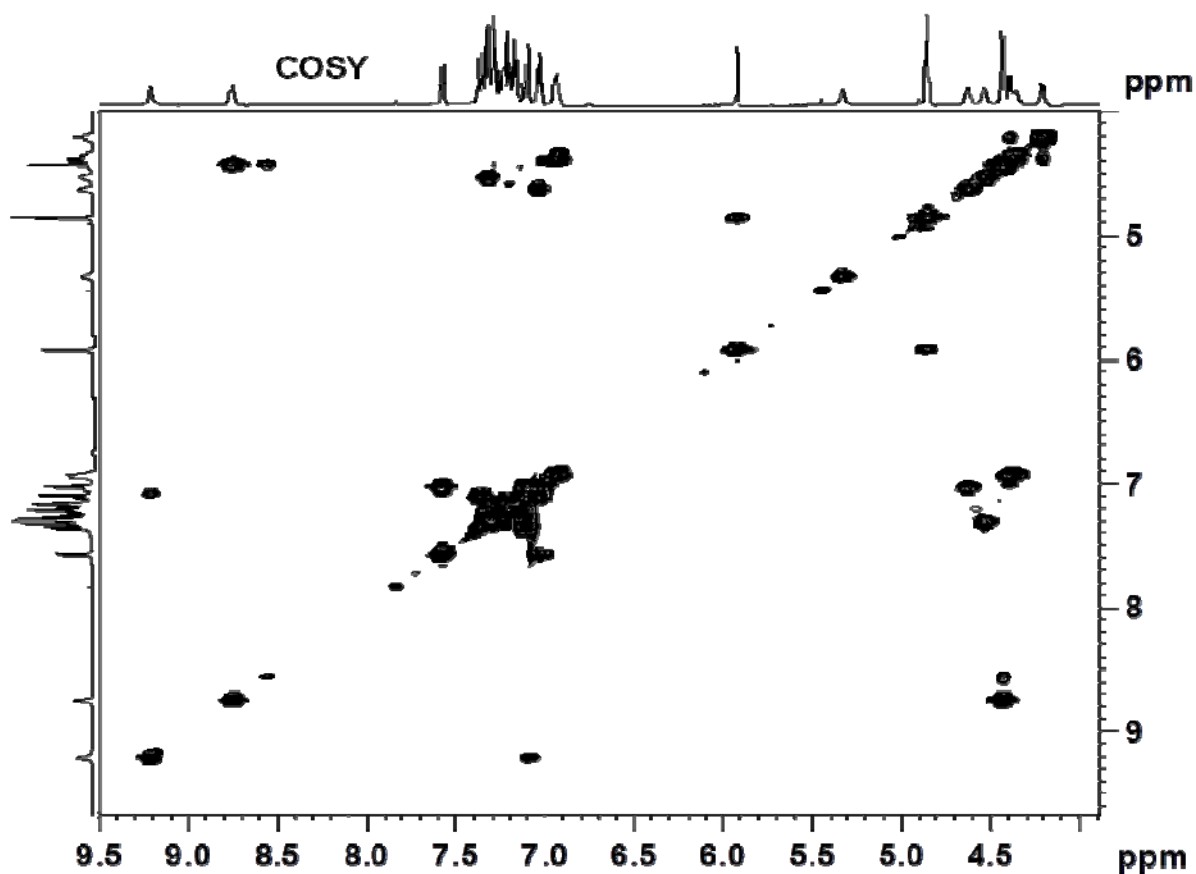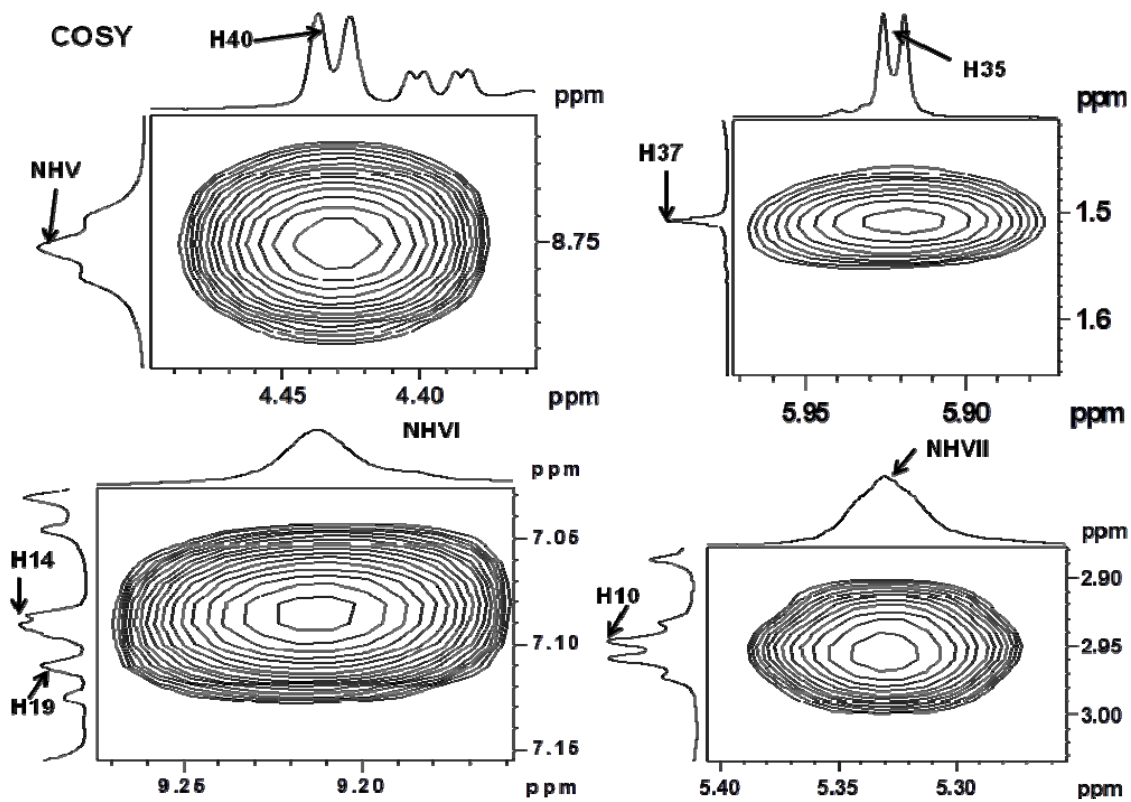

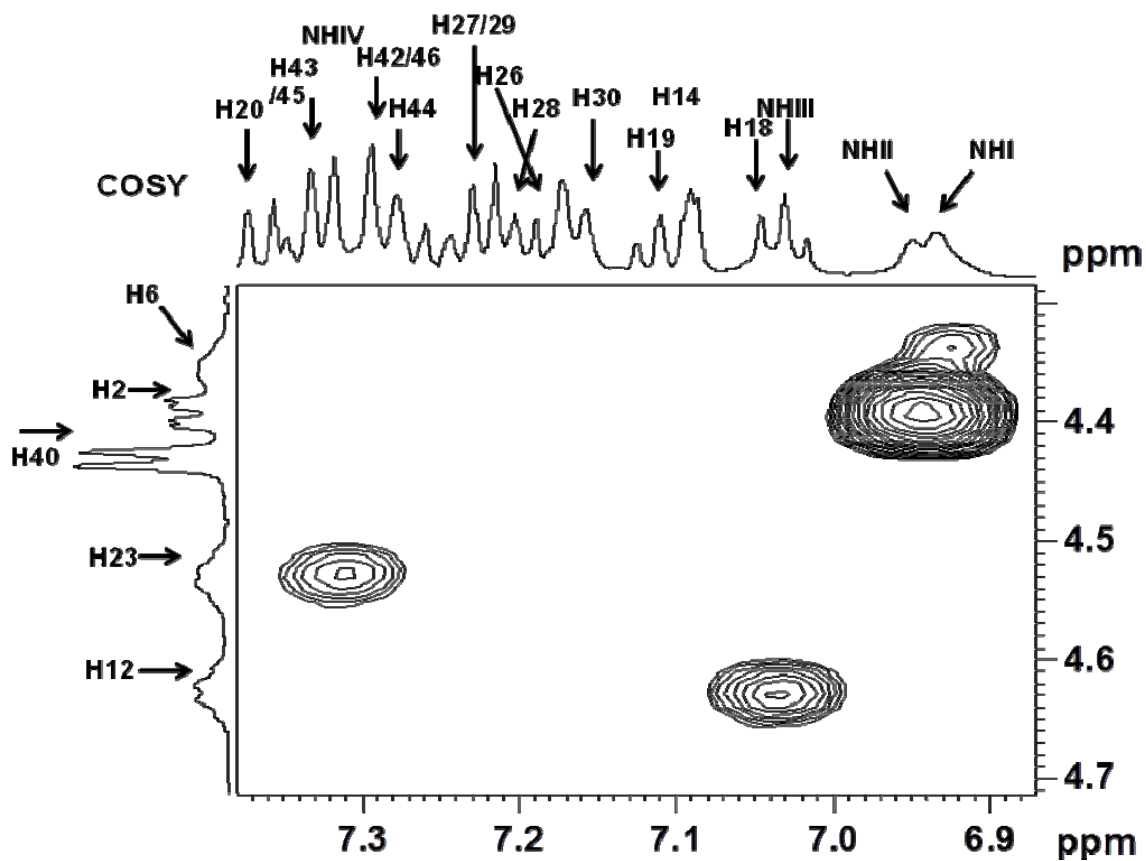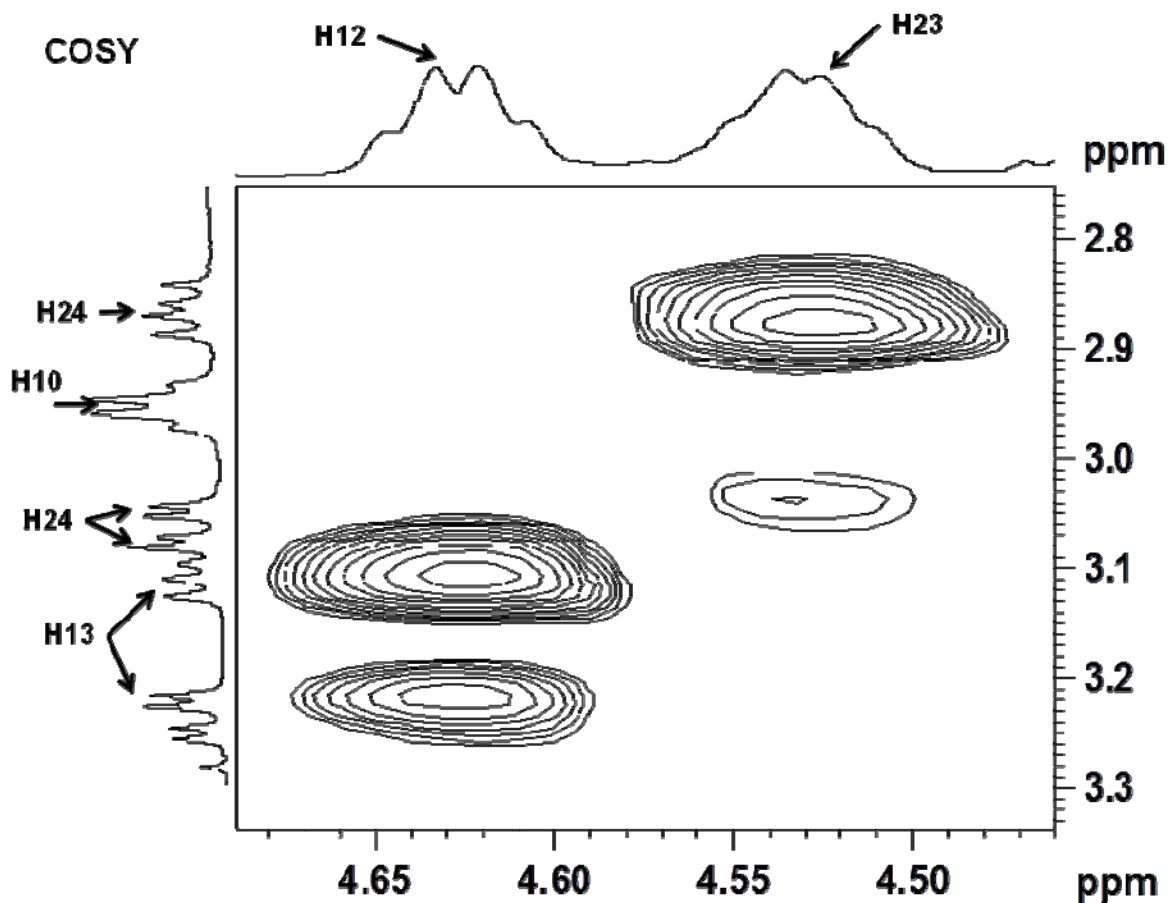

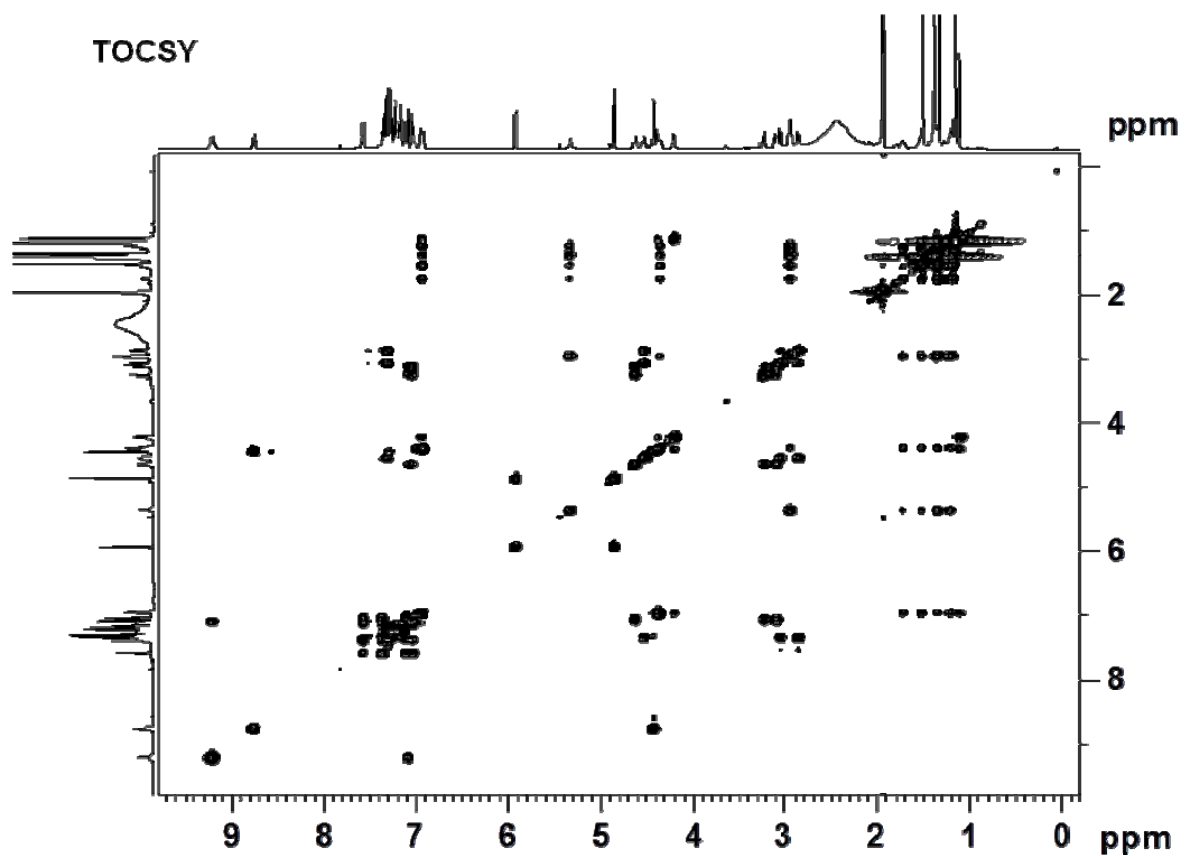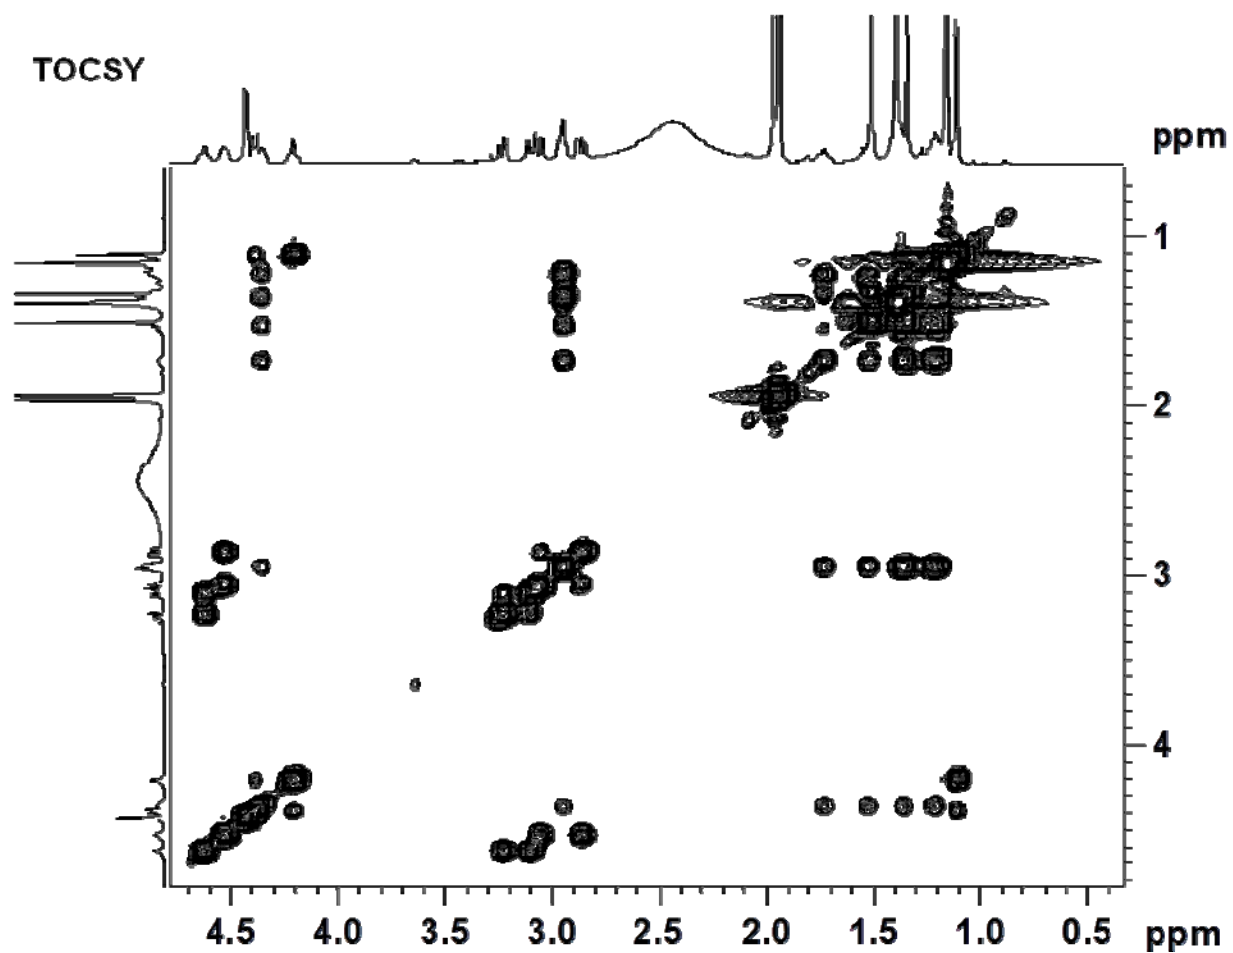

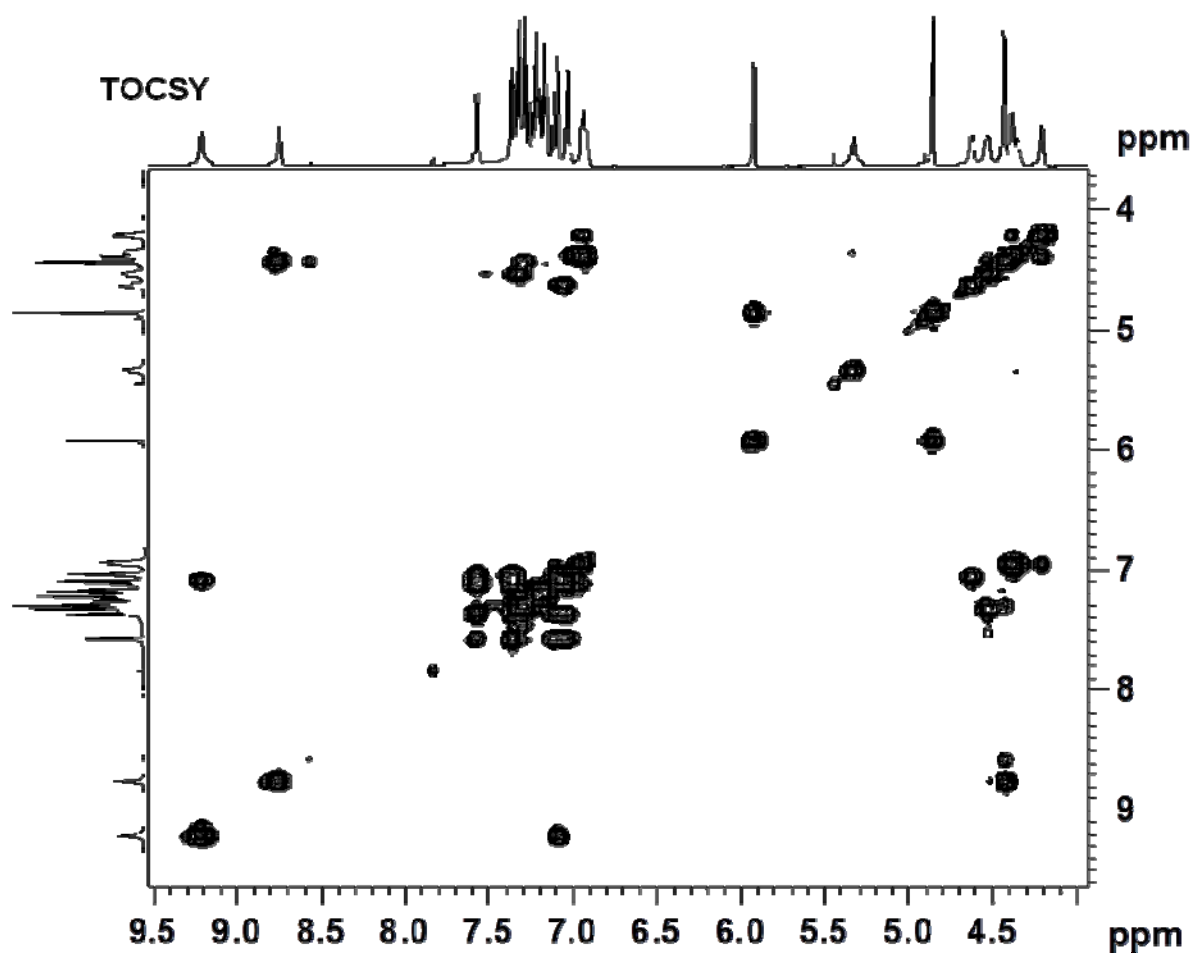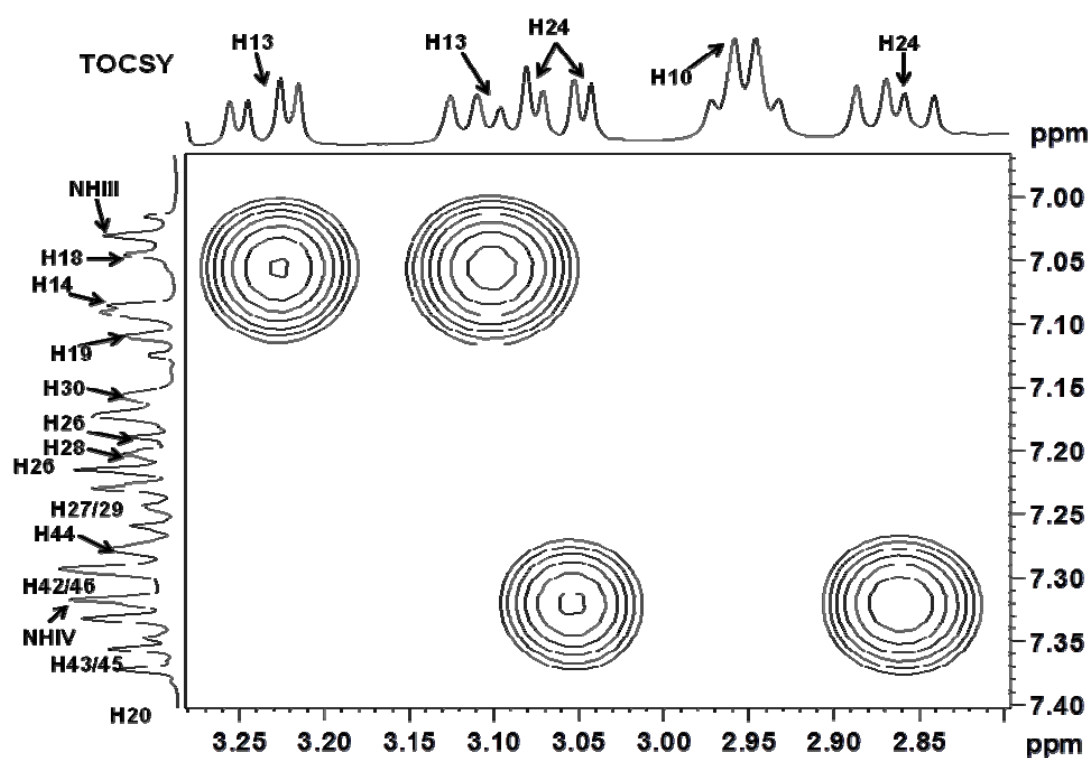



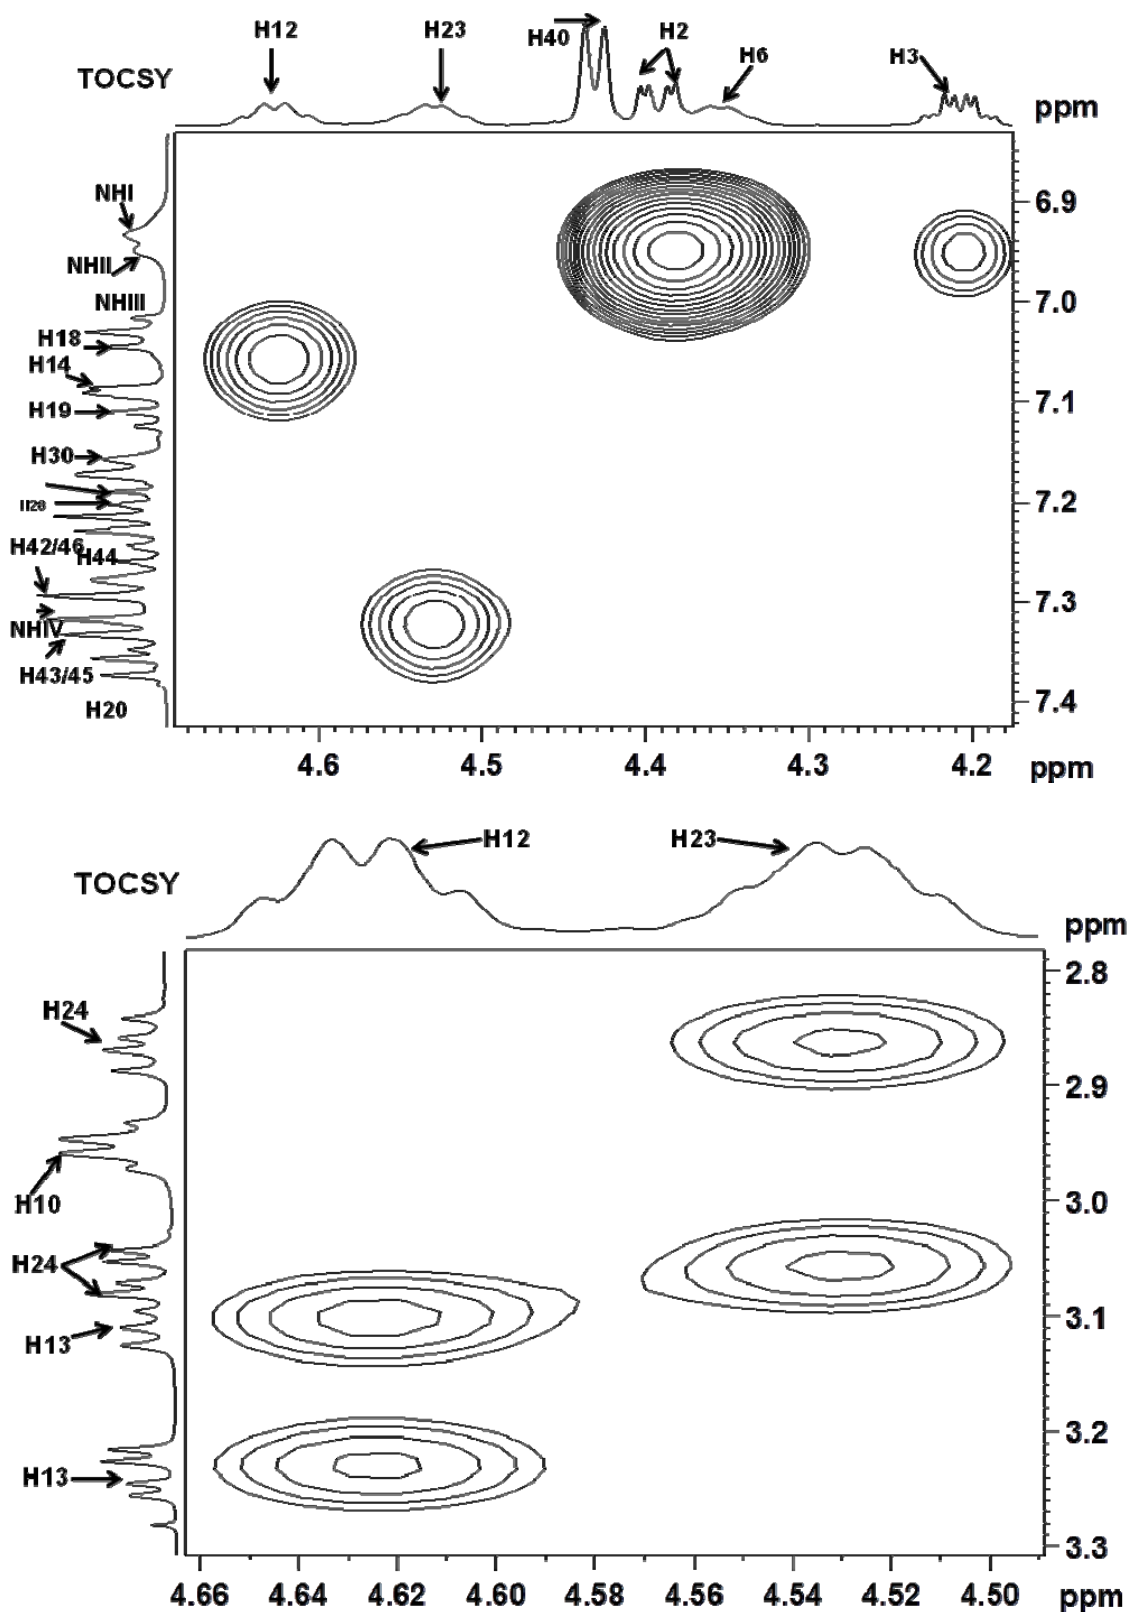

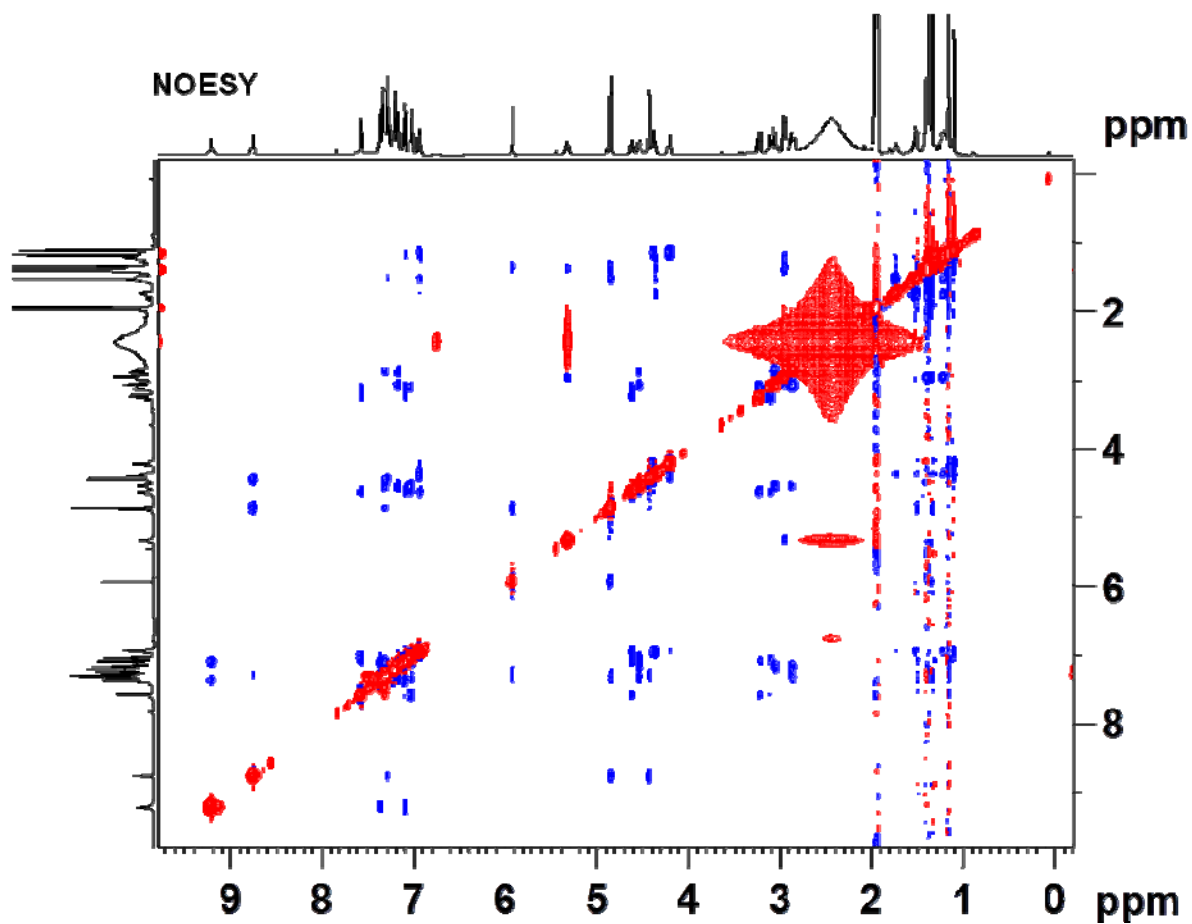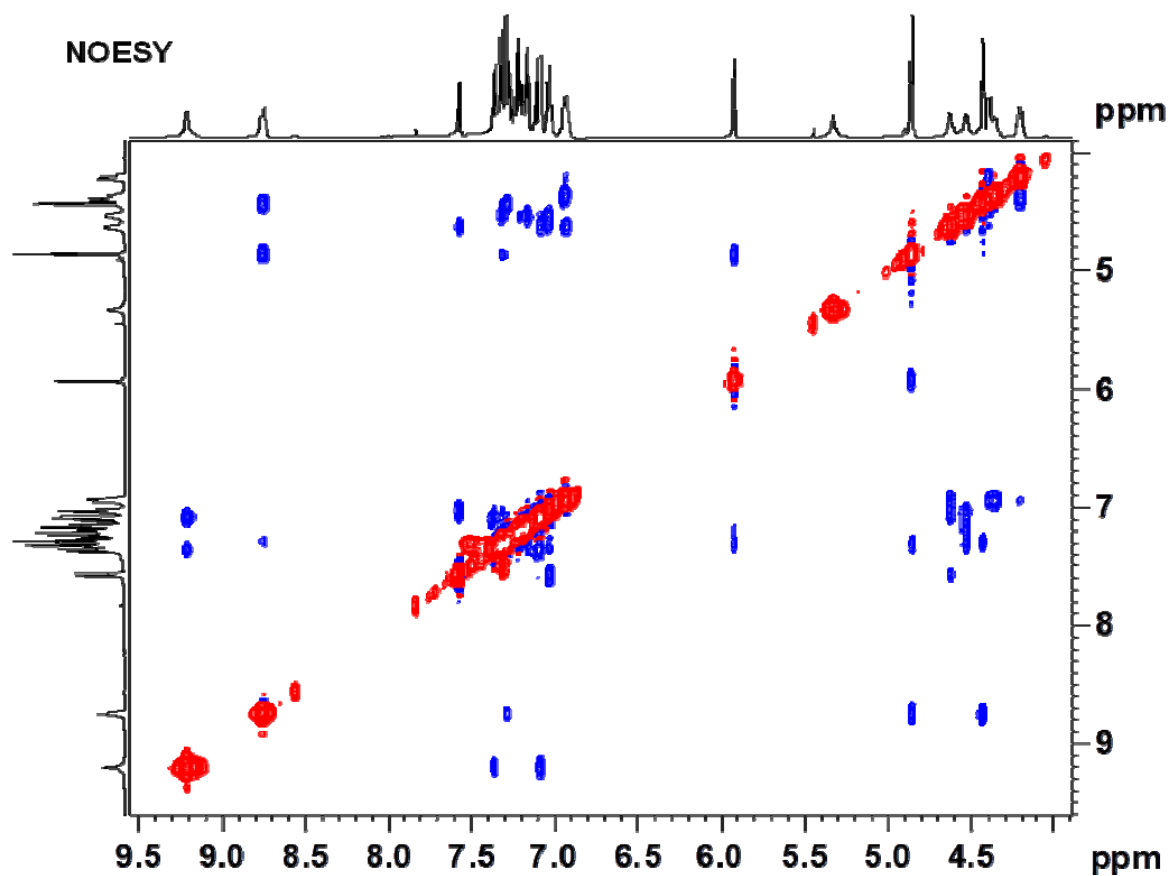

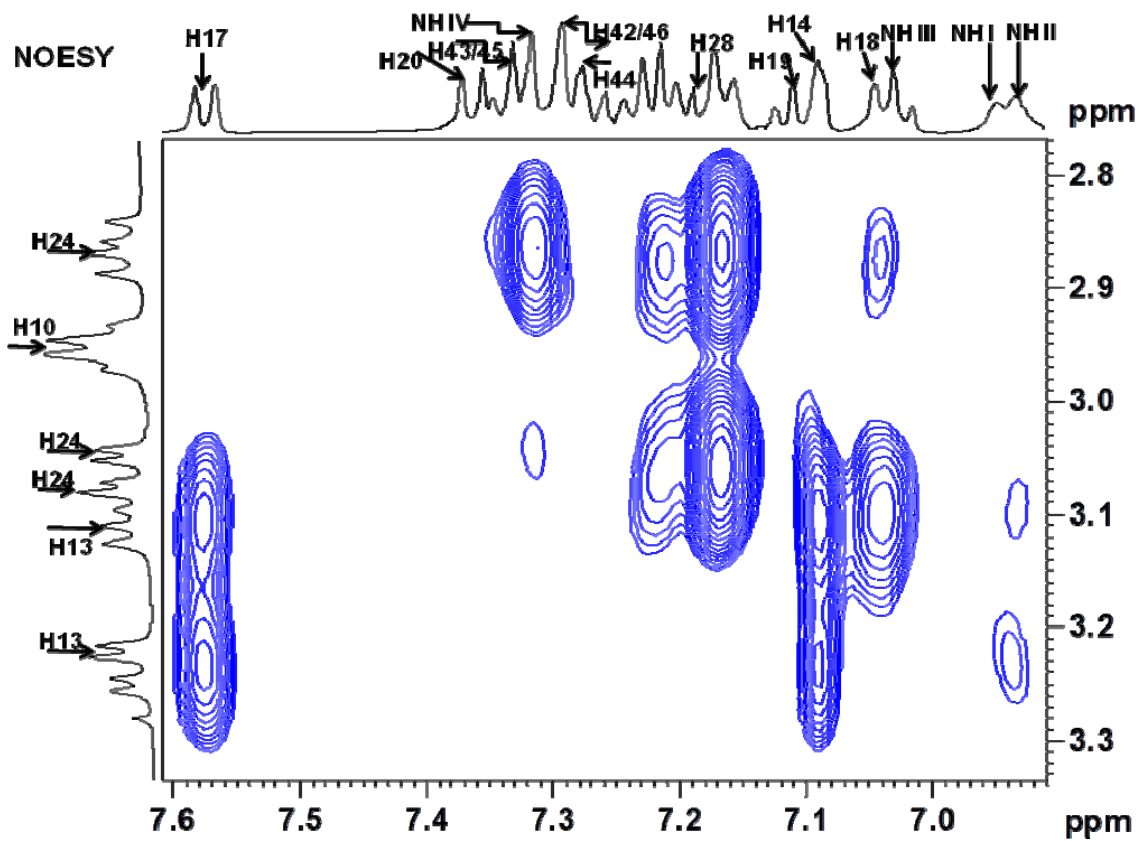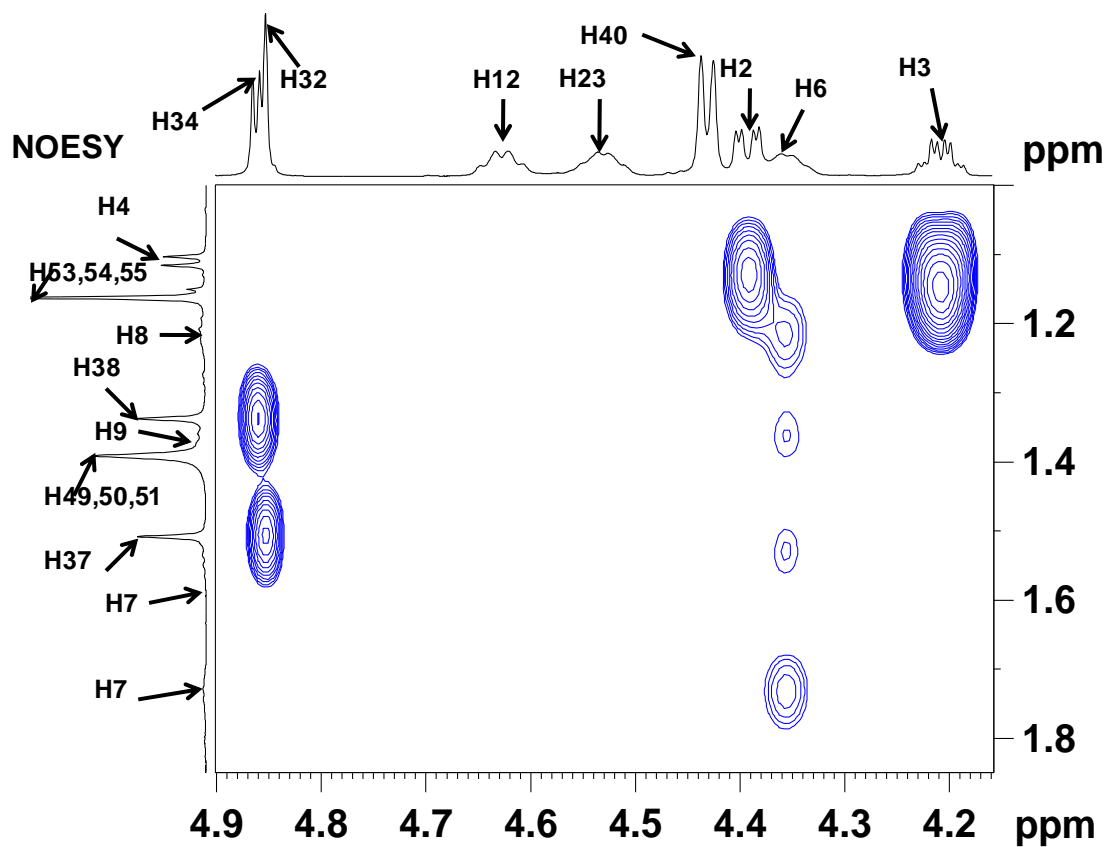

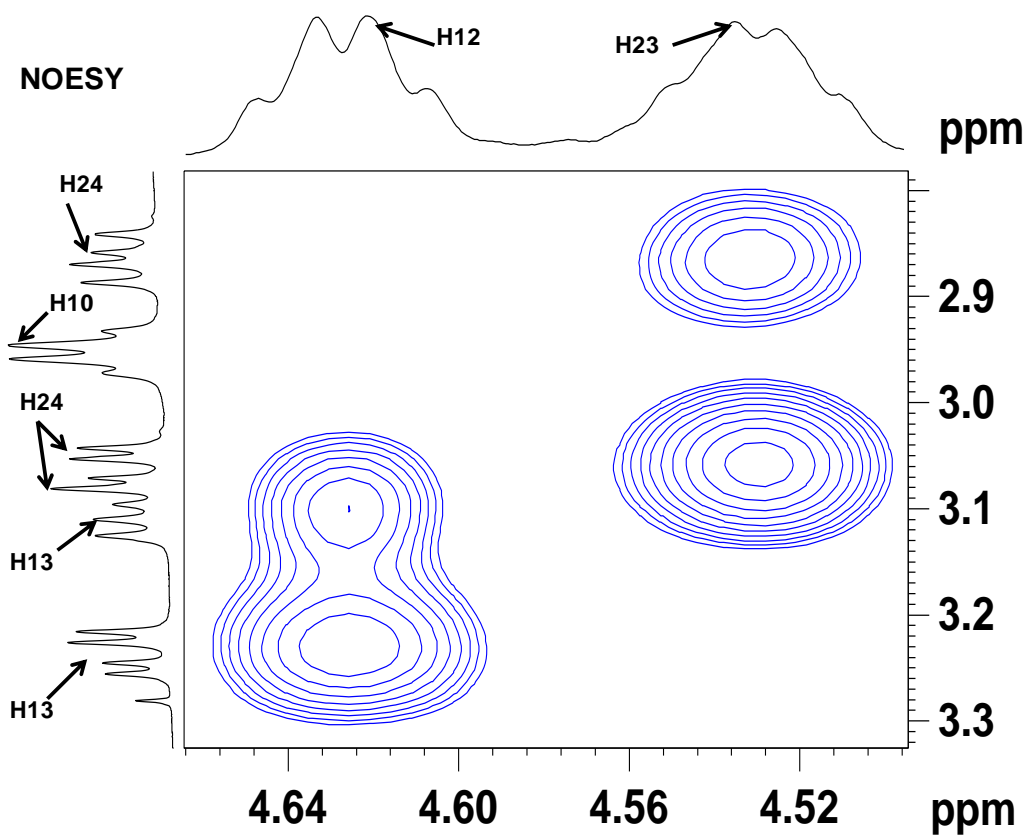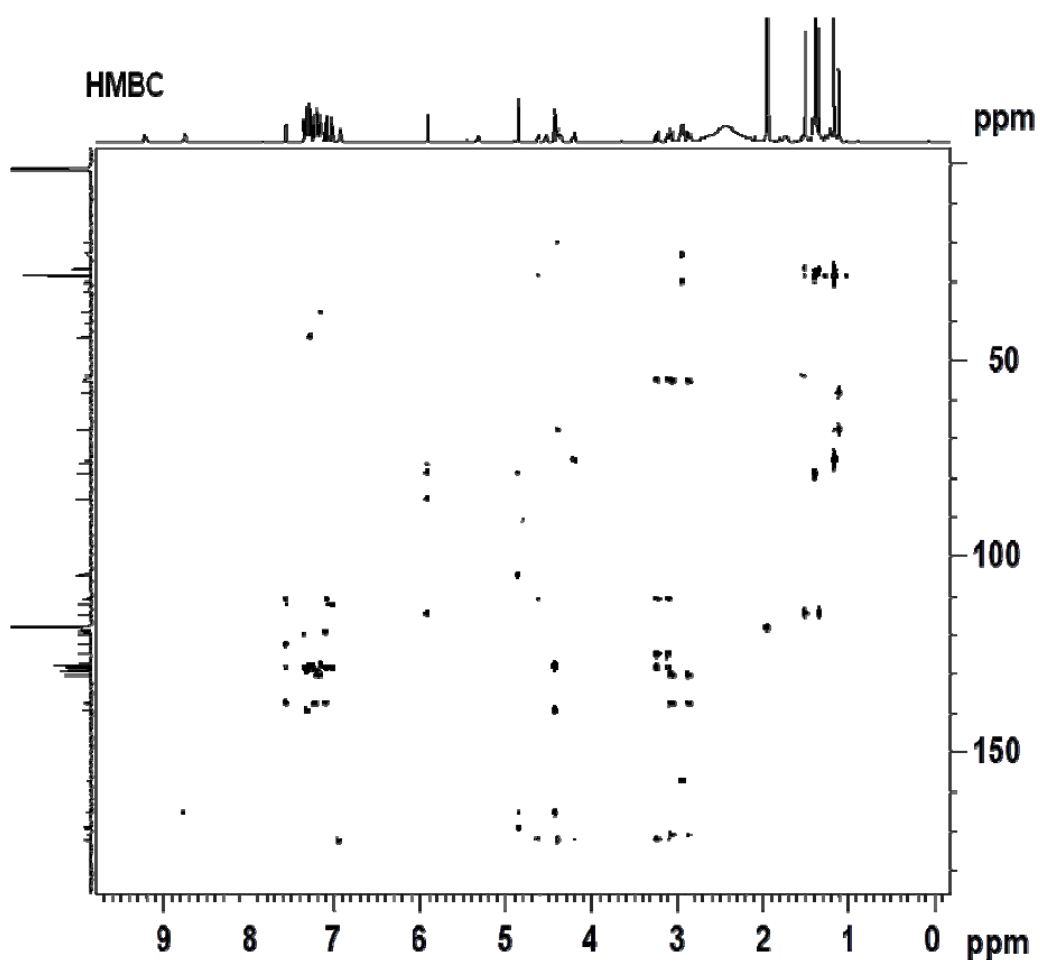

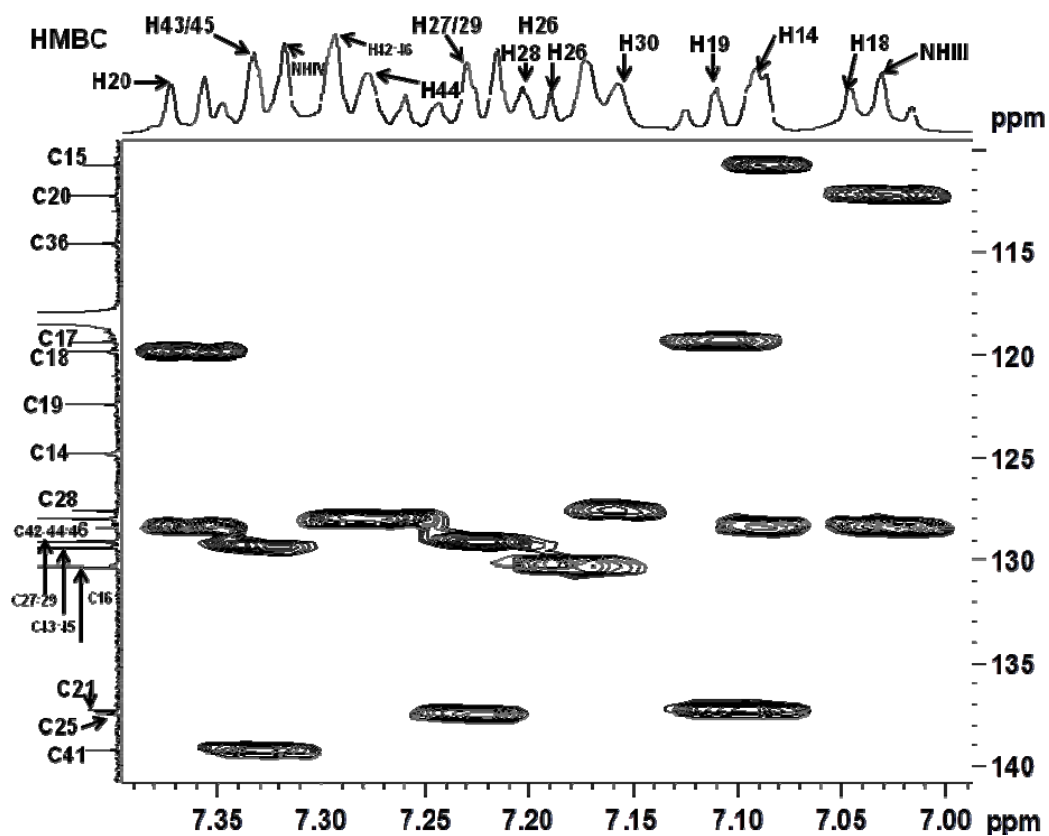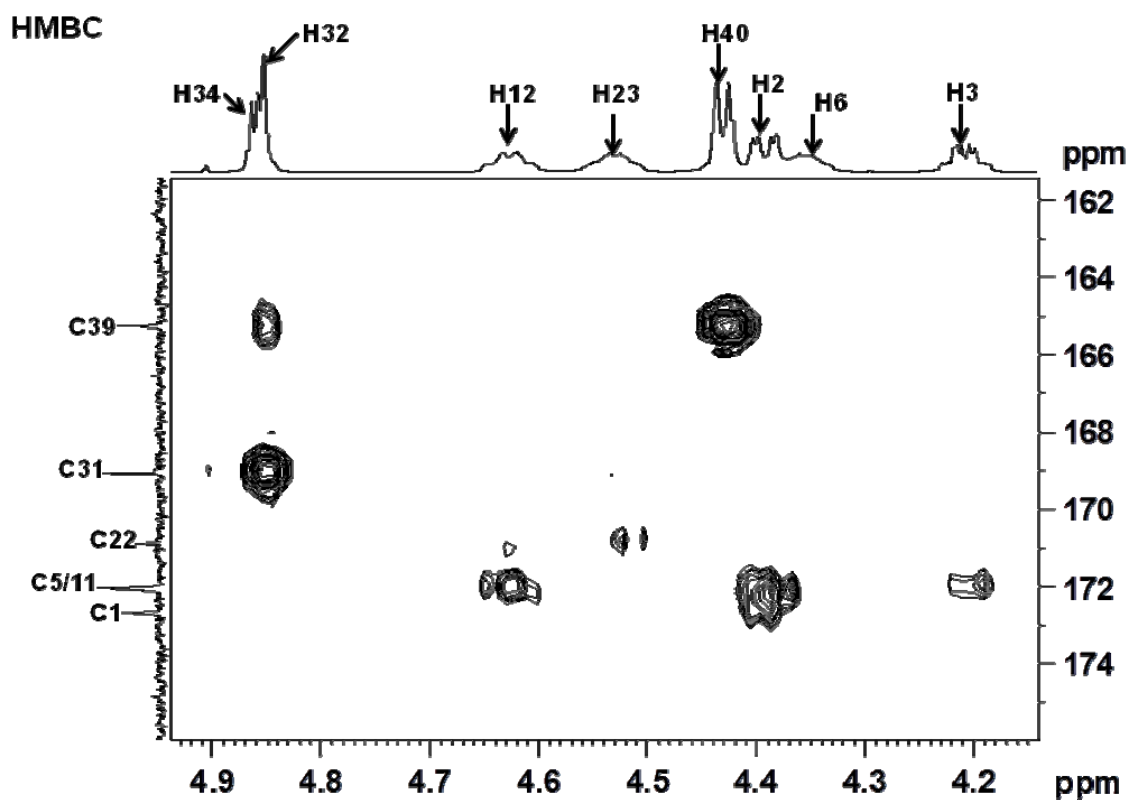

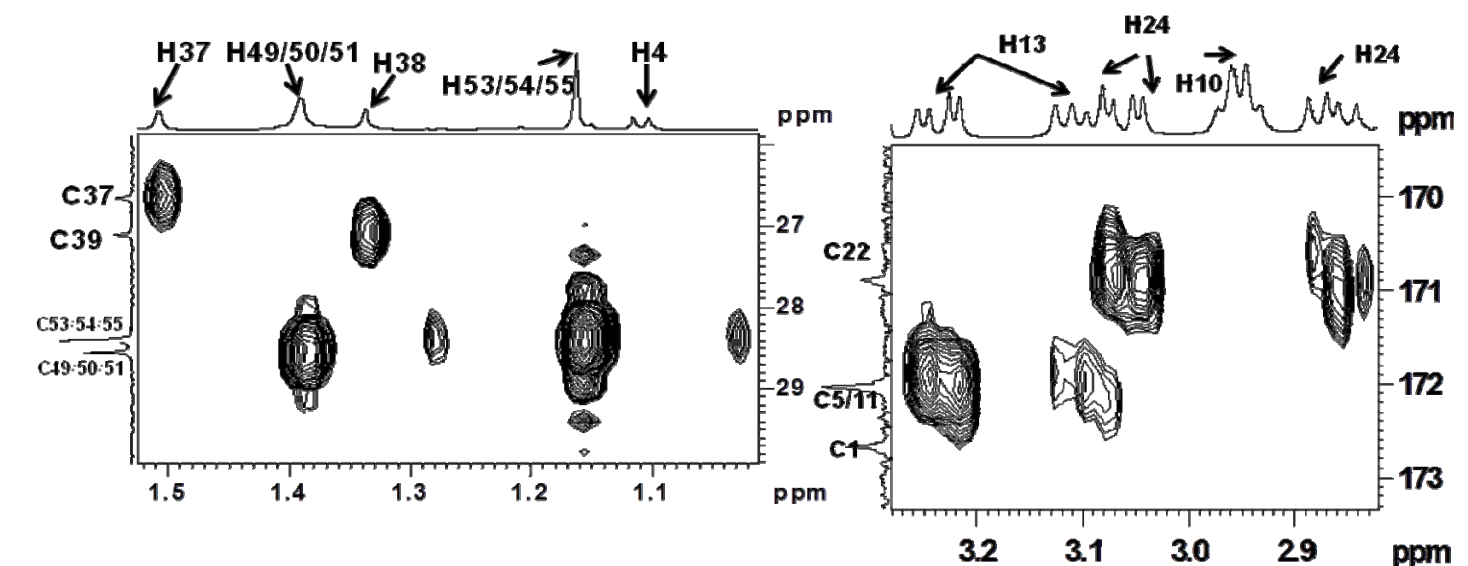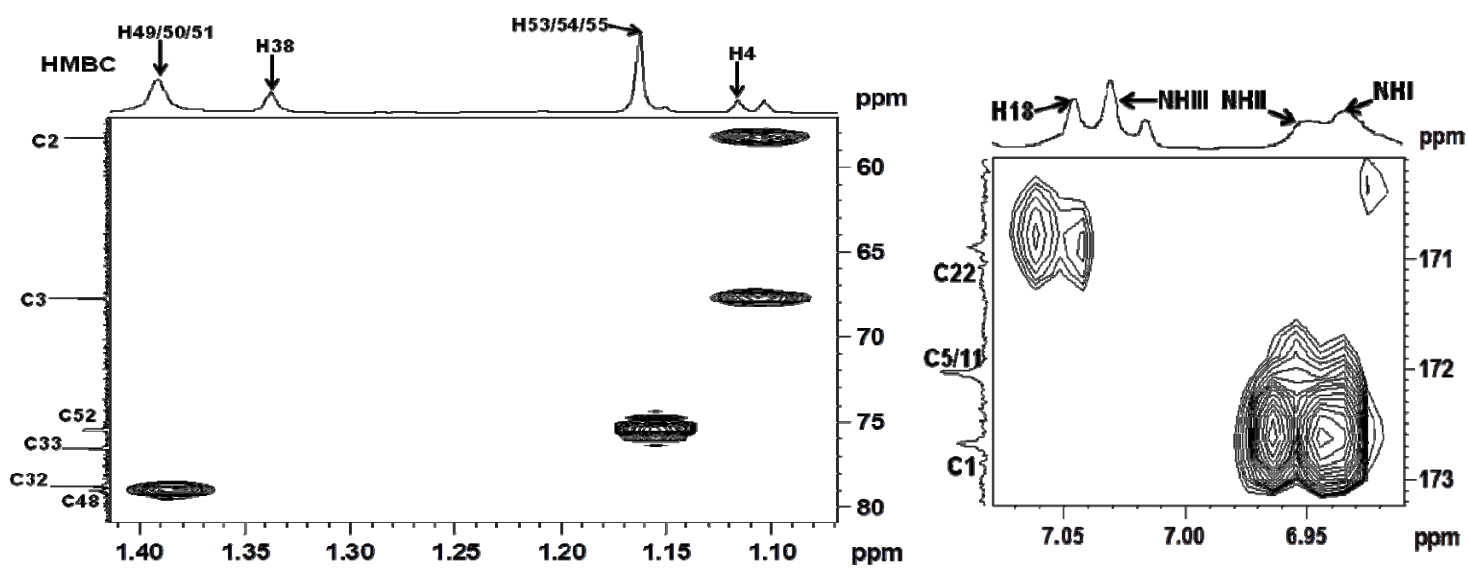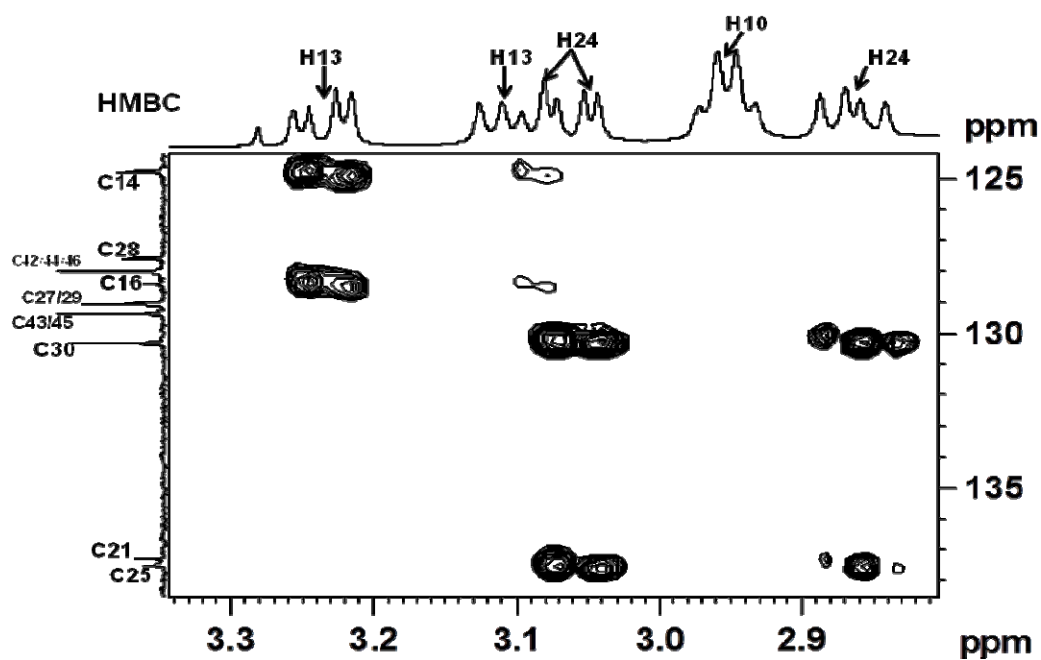

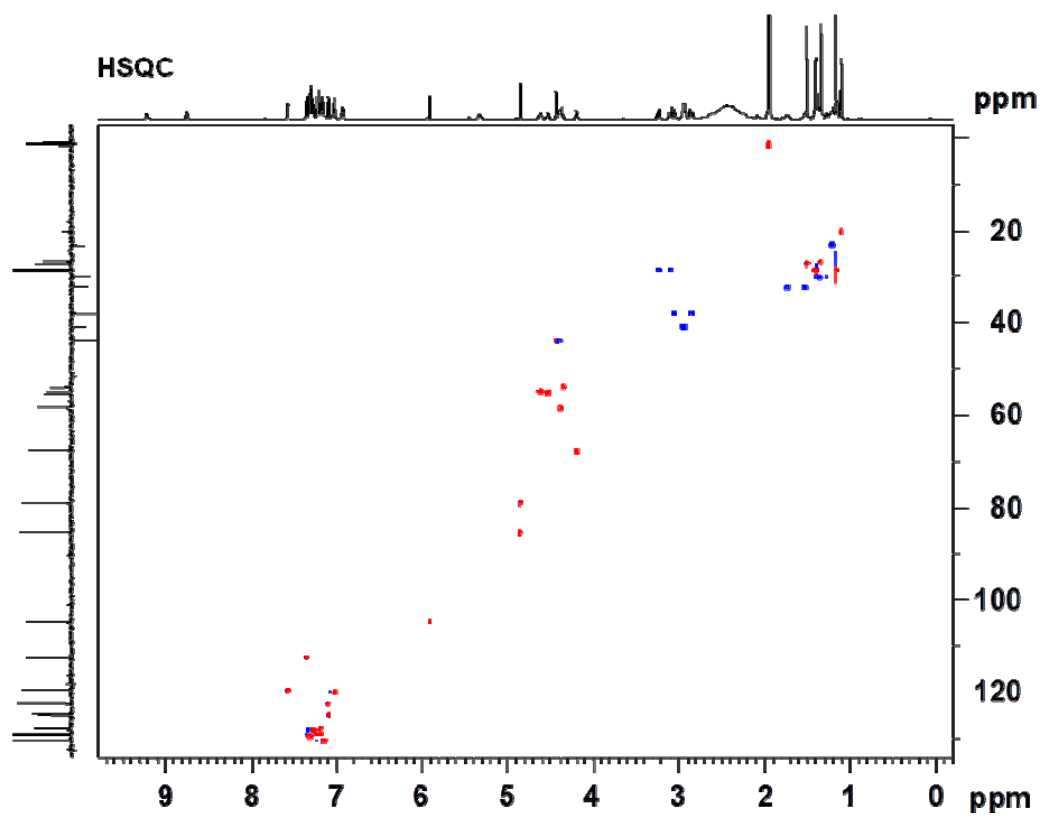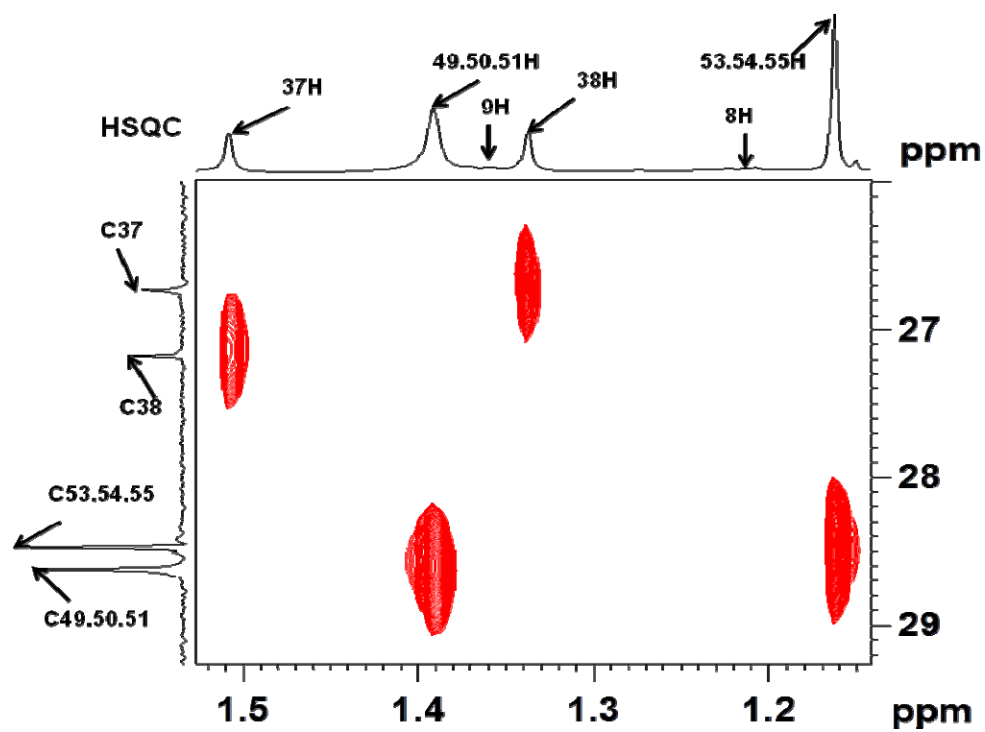

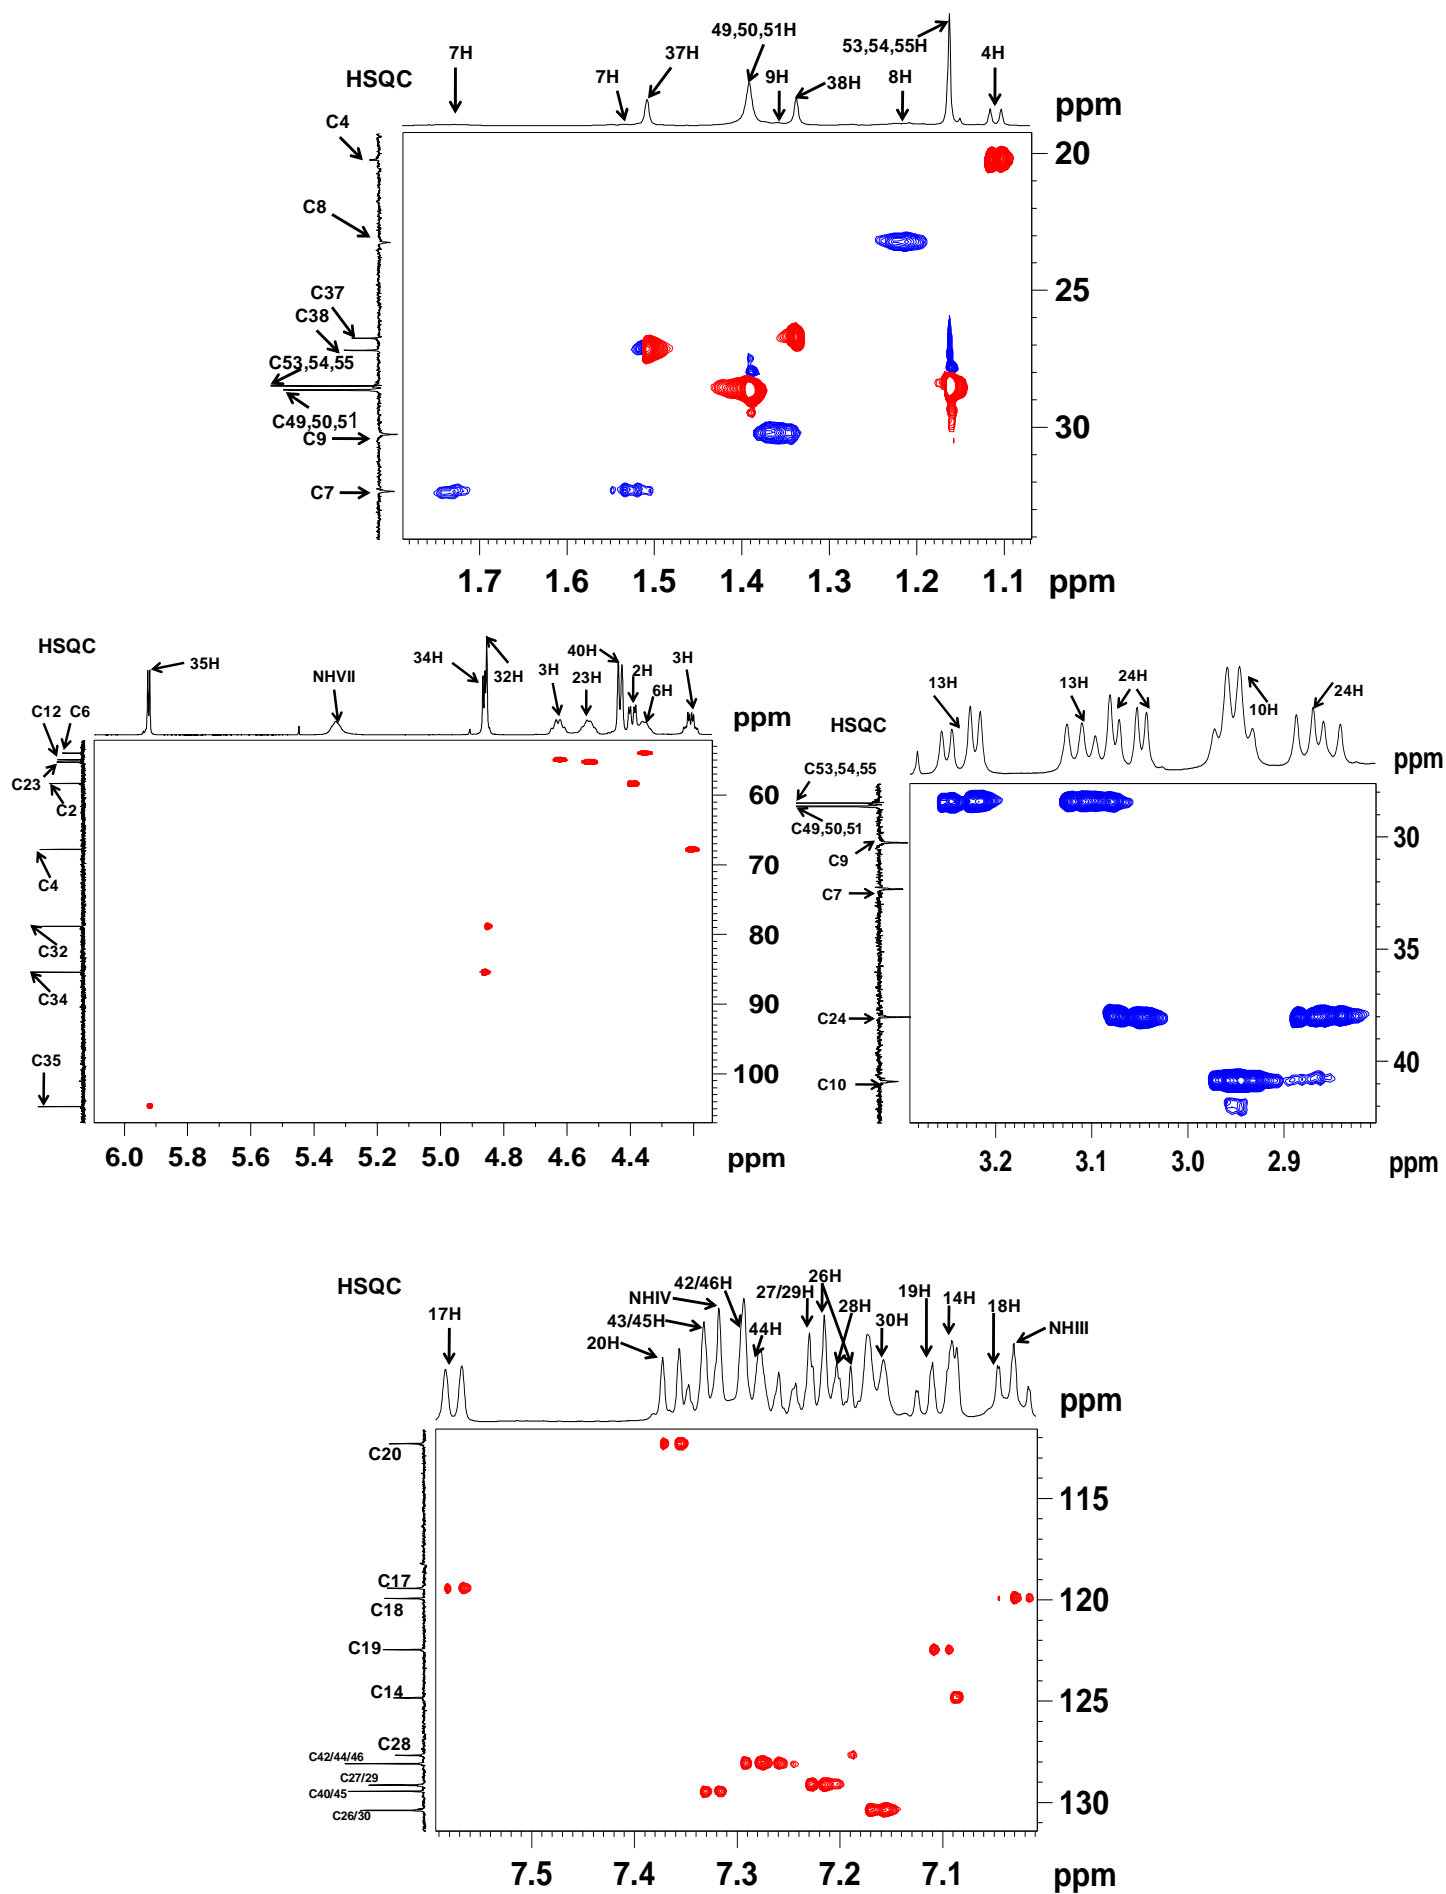



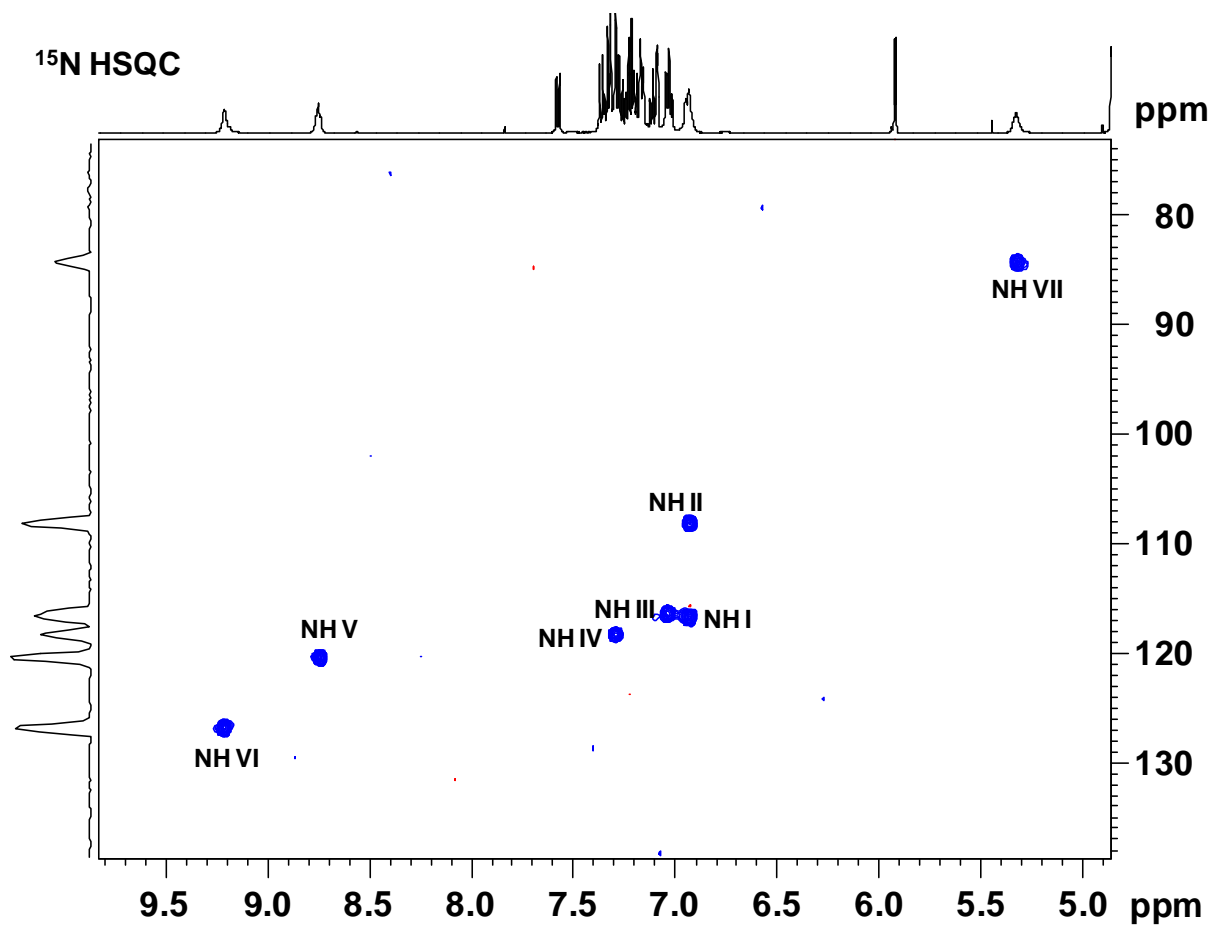

## DMSO Titration Studies

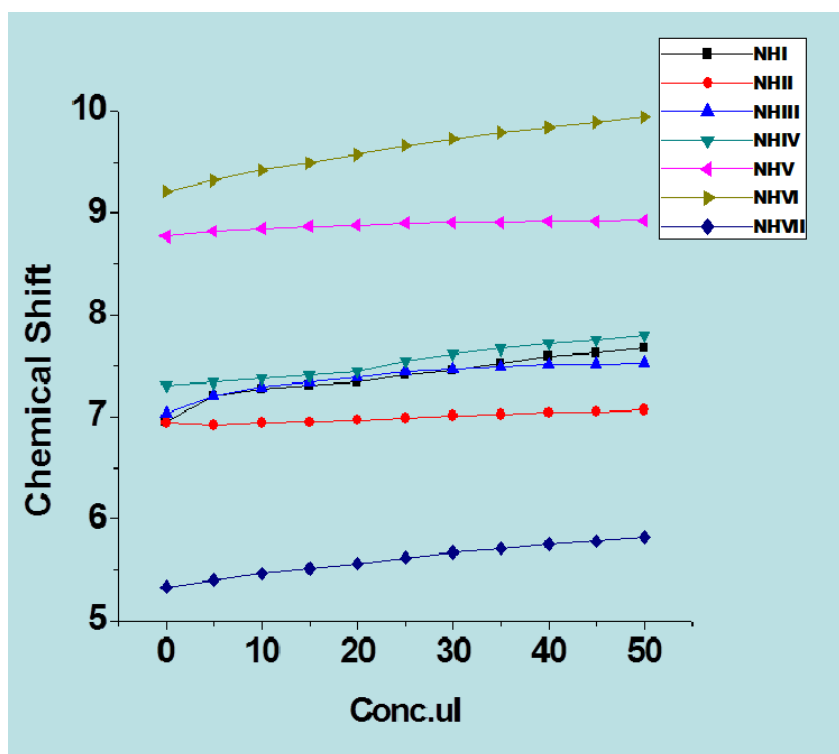

## DMSO Titration Studies –Change in Chemical Shifts

| CONC.<br>(ul)  | Chemical Shift (ppm) |      |       |      |      |      |       |
|----------------|----------------------|------|-------|------|------|------|-------|
|                | NHI                  | NHII | NHIII | NHIV | NHV  | NHVI | NHVII |
| 0              | 6.95                 | 6.94 | 7.03  | 7.31 | 8.77 | 9.21 | 5.33  |
| 5              | 7.21                 | 6.92 | 7.20  | 7.34 | 8.82 | 9.32 | 5.40  |
| 10             | 7.28                 | 6.94 | 7.29  | 7.38 | 8.85 | 9.42 | 5.46  |
| 15             | 7.31                 | 6.95 | 7.34  | 7.41 | 8.87 | 9.49 | 5.51  |
| 20             | 7.34                 | 6.97 | 7.39  | 7.45 | 8.88 | 9.57 | 5.56  |
| 25             | 7.41                 | 6.99 | 7.45  | 7.55 | 8.90 | 9.66 | 5.62  |
| 30             | 7.46                 | 7.01 | 7.47  | 7.62 | 8.91 | 9.73 | 5.67  |
| 35             | 7.53                 | 7.02 | 7.49  | 7.67 | 8.91 | 9.79 | 5.71  |
| 40             | 7.59                 | 7.04 | 7.51  | 7.72 | 8.92 | 9.84 | 5.75  |
| 45             | 7.63                 | 7.05 | 7.52  | 7.76 | 8.92 | 9.89 | 5.78  |
| 50             | 7.67                 | 7.07 | 7.53  | 7.80 | 8.93 | 9.94 | 5.82  |
| $\Delta\delta$ | 0.72                 | 0.13 | 0.5   | 0.49 | 0.16 | 0.73 | 0.49  |

### Distance constraints used in MD calculations for Glycopeptide 8 from NOESY experiment

| Sr.No. | From      | To  | Distance(Å) | Sr.No. | From      | To  | Distance(Å) |
|--------|-----------|-----|-------------|--------|-----------|-----|-------------|
| 1.     | NHV       | 32H | 2.76-2.26   | 7.     | 53/54/55H | 17H | 4.60-3.76   |
| 2.     | NHV       | 19H | 5.44-4.45   | 8.     | 35H       | 38H | 3.46-2.83   |
| 3.     | 17H       | 6H  | 4.86-3.98   | 9.     | 34H       | 38H | 2.94-2.41   |
| 4.     | 53/54/55H | 18H | 4.50-3.68   | 10.    | 32H       | 37H | 3.04-2.49   |
| 5.     | 53/54/55H | 14H | 3.96-3.24   |        |           |     |             |
| 6.     | 42H       | 37H | 4.00-3.27   |        |           |     |             |

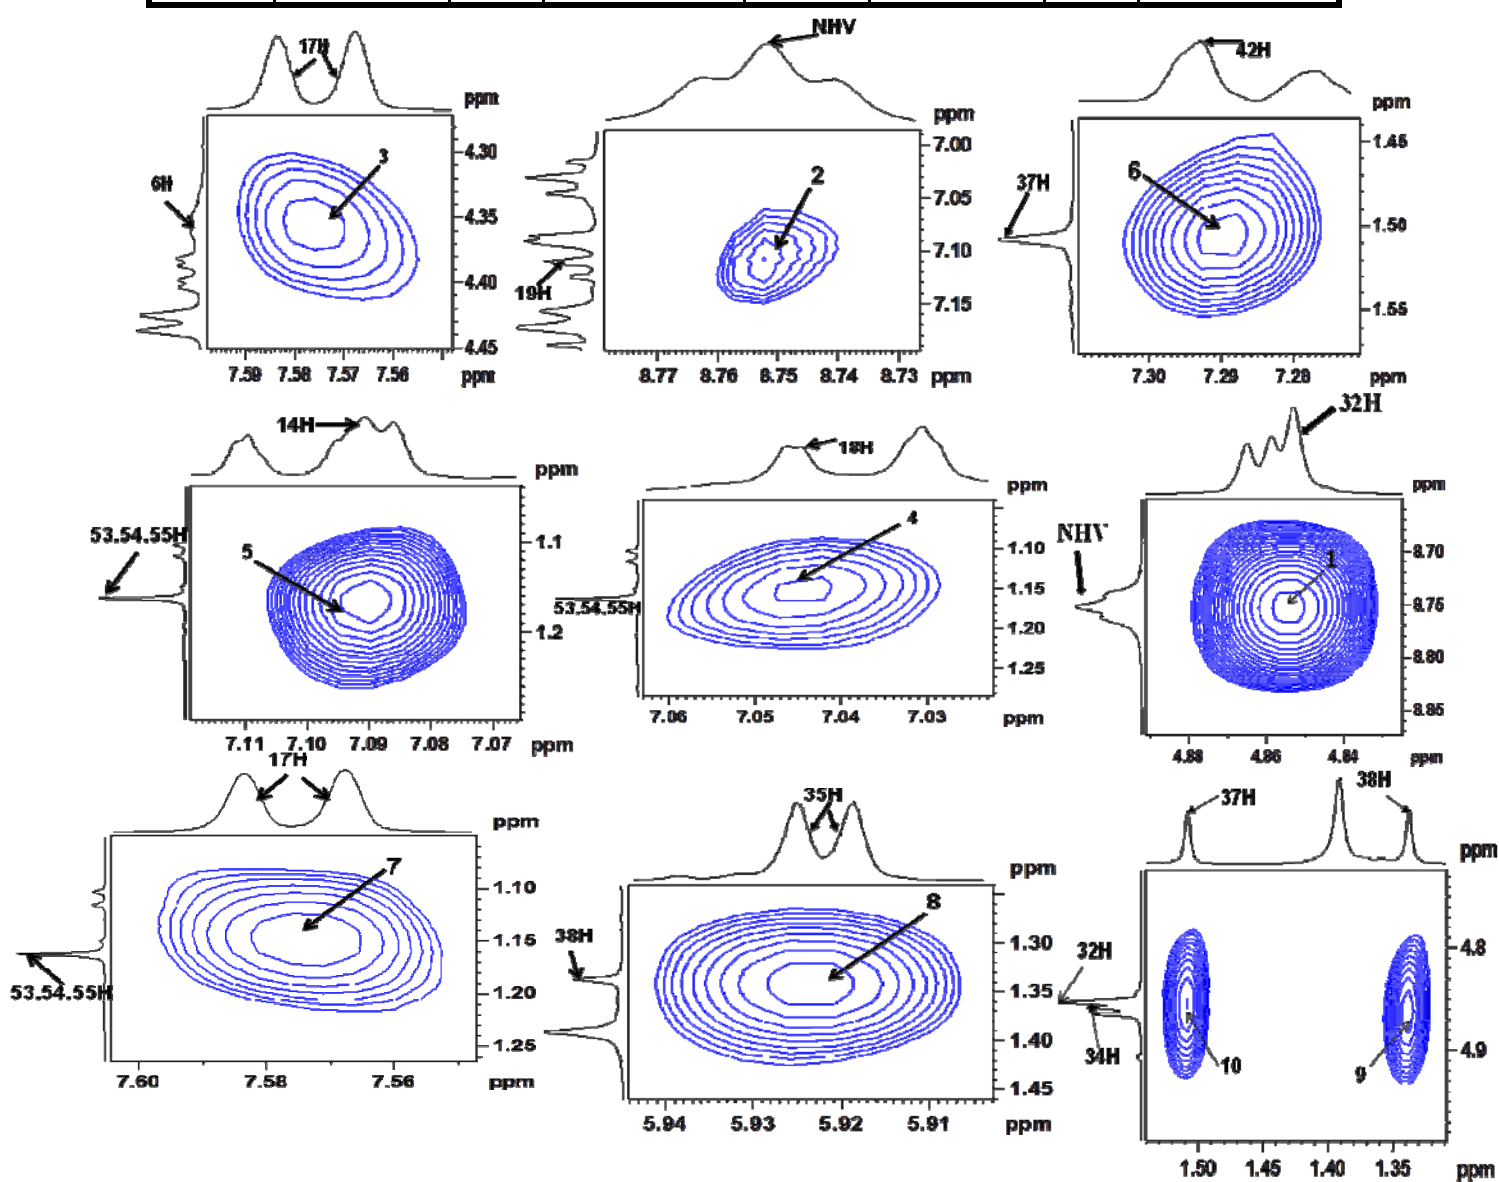

Supplement: c3ob41462k.pdf [file c3ob41462k.pdf]
